# Supplementary material for: An Integrated Analysis of Prognostic Signature and Immune Microenvironment in Tongue Squamous Cell Carcinoma
Source: Front Oncol. 2022 Jul 13;12:891716. doi: 10.3389/fonc.2022.891716 (PMC9326056; doi:10.3389/fonc.2022.891716)
Supplement: Supplementary Table 1 — Cox analysis of prognostic genes in TCGA. [file Table_1.xlsx]

## Sheet: Table 1
Id	HR	HR.95L	HR.95H	p-value
RTL1	1.00102	1.00063	1.0014	2.03e-07
SC5D	1.00013	1.00008	1.00018	2.39e-07
MTHFD2	1.00013	1.00008	1.00018	3.83e-07
DMRTB1	1.01394	1.0085	1.01941	4.53e-07
GNG10	1.00129	1.00078	1.00179	6.7e-07
FGD3	0.999099	0.998742	0.999456	7.63e-07
ZNF266	0.999192	0.99887	0.999514	8.74e-07
SLC25A45	0.996755	0.995461	0.998051	9.4e-07
HPRT1	1.00026	1.00015	1.00037	2.34e-06
ST13	1.00006	1.00004	1.00009	2.6e-06
EFNB2	1.00007	1.00004	1.00011	3.16e-06
NUBPL	1.0008	1.00046	1.00115	3.67e-06
C15orf57	1.00215	1.00122	1.00307	5.12e-06
CAMK2N1	1.00019	1.00011	1.00027	6.17e-06
HOXA1	1.0017	1.00096	1.00243	6.78e-06
MORF4L2	1.00007	1.00004	1.00011	7.19e-06
SZT2	0.999511	0.999296	0.999726	8.09e-06
CORO2B	1.00159	1.00089	1.00229	8.56e-06
TOMM34	1.00028	1.00015	1.0004	1e-05
NMD3	1.00018	1.0001	1.00026	1.05e-05
MTHFS	1.00326	1.0018	1.00472	1.2e-05
P4HA1	1.0001	1.00005	1.00014	1.23e-05
SEC11A	1.00017	1.00009	1.00025	1.3e-05
POLR2C	1.00022	1.00012	1.00032	2.1e-05
STC2	1.0001	1.00005	1.00014	2.16e-05
ZNF101	0.998434	0.997705	0.999164	2.65e-05
PITPNM3	0.999691	0.999546	0.999836	3.06e-05
MRPL10	1.00044	1.00023	1.00065	3.26e-05
PGK1	1.00001	1.00001	1.00002	3.55e-05
NR0B1	1.00041	1.00021	1.0006	4.38e-05
UTY	0.999414	0.999133	0.999696	4.51e-05
FXR1	1.00006	1.00003	1.00009	4.99e-05
STC1	1.00006	1.00003	1.00008	5.03e-05
MAGEB3	1.03475	1.01777	1.05201	5.2e-05
ANKMY1	0.998243	0.997392	0.999095	5.32e-05
C2orf70	1.00705	1.00362	1.01049	5.34e-05
PRDM15	0.998832	0.998265	0.9994	5.57e-05
ZAP70	0.999067	0.998611	0.999522	5.98e-05
SSB	1.00013	1.00007	1.00019	5.98e-05
TMC8	0.999648	0.999476	0.99982	6.08e-05
TRPA1	1.00108	1.00055	1.00161	6.27e-05
SNX14	1.00043	1.00022	1.00065	6.35e-05
FLT3	0.992066	0.988185	0.995962	6.8e-05
TCEAL8	1.00034	1.00017	1.0005	6.9e-05
TMED4	1.00019	1.0001	1.00029	7.1e-05
CYB5B	1.00013	1.00006	1.00019	8.28e-05
PSMC1	1.00051	1.00025	1.00076	8.85e-05
CUL9	0.999698	0.999547	0.999849	8.98e-05
TMCO1	1.00008	1.00004	1.00013	9.06e-05
PSMD7	1.00014	1.00007	1.00021	9.2e-05
PCMT1	1.00019	1.00009	1.00029	9.27e-05
NKX2-8	1.00198	1.00099	1.00298	9.7e-05
RNF121	1.00023	1.00011	1.00034	9.75e-05
SH3BP2	0.999775	0.999662	0.999889	0.000101099
FGB	1.00159	1.00079	1.00239	0.000104365
ARRDC5	0.962565	0.944172	0.981317	0.000106238
LASP1	1.00005	1.00003	1.00008	0.000107162
CYP19A1	1.00607	1.00299	1.00916	0.000108527
RP11-12J10.3	0.96886	0.95343	0.98454	0.000112449
CFAP20	1.00038	1.00019	1.00057	0.000117156
RP11-295P9.3	0.997727	0.996571	0.998883	0.000117957
CD6	0.999364	0.99904	0.999688	0.000121526
ZC3H12D	0.996767	0.995122	0.998415	0.000122375
AIG1	1.00014	1.00007	1.00021	0.00012479
PCGF2	1.00029	1.00014	1.00044	0.000129708
MAP7D3	1.00054	1.00026	1.00082	0.000130624
CDH6	1.00047	1.00023	1.00072	0.000131766
CDK8	1.00081	1.00039	1.00122	0.000134682
KIR3DX1	0.936847	0.905952	0.968796	0.000137388
PASK	0.999055	0.99857	0.999541	0.000139937
RRAS2	1.0002	1.00009	1.0003	0.000145349
C16orf87	1.00101	1.00049	1.00153	0.000145913
KLHL1	1.03348	1.016	1.05126	0.000154021
CHGB	1.00001	1	1.00001	0.000155204
AIMP2	1.00035	1.00017	1.00054	0.000156001
PCTP	1.00057	1.00027	1.00087	0.000158674
GPR50	1.00028	1.00013	1.00042	0.000172883
CRLF2	0.974764	0.961822	0.987881	0.00017828
KIAA1279	1.00057	1.00027	1.00086	0.000186269
SMAP2	0.999705	0.99955	0.99986	0.000186827
SLC2A3	1.00006	1.00003	1.00009	0.000187829
CLNK	0.98744	0.980912	0.994011	0.000187848
HSPC047	1.06518	1.03046	1.10107	0.000187936
SH2D3C	0.999224	0.998817	0.999631	0.000188463
FZD3	1.00064	1.0003	1.00097	0.000190977
OTUD7A	0.997149	0.995648	0.998652	0.000202339
HOXA11	1.00146	1.00069	1.00223	0.000202365
PCDH9	1.00068	1.00032	1.00104	0.000211235
PDGFA	1.0002	1.00009	1.0003	0.000211778
TRAF3IP3	0.998844	0.998231	0.999457	0.000220304
TOR1A	1.00034	1.00016	1.00051	0.000222352
SLC35E2B	0.999524	0.999271	0.999777	0.0002233
SPNS3	0.988647	0.982666	0.994663	0.000225387
MAP2K7	0.999572	0.999345	0.999799	0.000226352
RLTPR	0.998155	0.997175	0.999135	0.000227184
KLRK1	0.980275	0.969935	0.990724	0.000230997
PTH2	1.04132	1.01911	1.06402	0.000232353
TXNDC9	1.00024	1.00011	1.00036	0.000233354
NLRC3	0.998623	0.99789	0.999356	0.000233593
PPID	1.00055	1.00026	1.00085	0.000234851
ZNF700	0.998356	0.99748	0.999232	0.000236805
ZNF414	0.998631	0.997901	0.999361	0.000237729
BTLA	0.992951	0.989213	0.996704	0.000237877
ZNF831	0.996915	0.995273	0.998561	0.000240687
YIPF6	1.00029	1.00013	1.00044	0.000244438
PARP15	0.996416	0.994505	0.998331	0.000247325
MAP2K1	1.00019	1.00009	1.00028	0.000249769
FCRL3	0.996939	0.995302	0.998579	0.000257274
CD5	0.999233	0.99882	0.999645	0.000267739
C1GALT1	1.00028	1.00013	1.00043	0.000275926
NR2C2	0.999635	0.999439	0.999832	0.000276156
MXD4	0.999824	0.999729	0.999919	0.000281922
NDFIP1	1.00017	1.00008	1.00026	0.000282188
NOSTRIN	0.994026	0.990808	0.997255	0.000293365
KLRC4-KLRK1	0.947995	0.920977	0.975805	0.000294326
TP53INP1	0.999674	0.999498	0.999851	0.000300391
SYT1	1.00051	1.00023	1.00079	0.000309932
TEX19	1.01659	1.00754	1.02573	0.000312066
INSIG2	1.00041	1.00019	1.00064	0.000314274
TAF7	1.00013	1.00006	1.00021	0.000314651
LIMD2	0.999595	0.999375	0.999816	0.000317156
CCDC43	1.00063	1.00029	1.00098	0.000319325
PIK3R3	0.999656	0.999468	0.999843	0.000322546
UPK2	1.00307	1.0014	1.00475	0.000322776
USP9Y	0.999579	0.999349	0.999808	0.000324926
CALCA	1.00164	1.00074	1.00253	0.000333807
TXK	0.989704	0.984123	0.995316	0.000334125
PRPS1	1.00021	1.0001	1.00032	0.000334525
SDCBP	1.0001	1.00004	1.00015	0.000335532
FTH1	1.00001	1.00001	1.00002	0.000338005
SLC35E2	0.99029	0.985018	0.99559	0.00033954
AKNA	0.999753	0.999617	0.999888	0.000347572
DNASE1L1	1.0003	1.00014	1.00047	0.000349678
RNF6	1.00025	1.00011	1.00038	0.00034973
SRP54	1.00019	1.00009	1.00029	0.000356208
CLEC2D	0.998986	0.99843	0.999543	0.000361638
PEX11A	1.00149	1.00067	1.00231	0.000362709
PLGLB1	0.924241	0.885024	0.965196	0.00036904
TBC1D10C	0.999269	0.998867	0.999672	0.000371877
CCBE1	1.00057	1.00026	1.00088	0.000377365
SGSM2	0.999668	0.999485	0.999851	0.000379081
2021-09-01	0.999214	0.998781	0.999648	0.000380006
SELT	1.00008	1.00003	1.00012	0.000403923
DENND1C	0.999383	0.999041	0.999725	0.000408817
KDM2B	0.999593	0.999367	0.999819	0.000420526
ZCRB1	1.00037	1.00016	1.00058	0.000432192
ZP3	1.00025	1.00011	1.00038	0.00043324
RAB37	0.996449	0.994477	0.998426	0.000434004
TCEAL4	1.00014	1.00006	1.00022	0.000435505
METTL5	1.00032	1.00014	1.0005	0.000440047
TTC24	0.984495	0.975945	0.99312	0.000446064
CSNK2A2	1.00014	1.00006	1.00022	0.000453492
ATAD1	1.00032	1.00014	1.0005	0.000454086
TAX1BP1	1.0001	1.00004	1.00015	0.000455327
FHL2	1.00006	1.00003	1.00009	0.000462042
CDY1	334.722	12.8645	8709.17	0.00047175
USP10	1.00016	1.00007	1.00025	0.000473028
SEC62	1.00007	1.00003	1.00011	0.00047396
A3GALT2	0.913626	0.868495	0.961103	0.000474274
DCLRE1C	0.998659	0.997907	0.999412	0.000482016
SLC23A1	0.993426	0.989752	0.997113	0.000483655
KLHL7	1.00037	1.00016	1.00057	0.000490643
ALG5	1.00038	1.00017	1.0006	0.000492322
RALB	1.00006	1.00003	1.0001	0.000511795
ZNF557	0.997954	0.996802	0.999109	0.000516347
PSMA6	1.00015	1.00006	1.00023	0.00051696
KDM5D	0.999717	0.999556	0.999877	0.000524774
DOT1L	0.999737	0.999589	0.999886	0.000533154
DENND2D	0.999646	0.999446	0.999846	0.000533236
ADA	1.00015	1.00006	1.00023	0.000544605
ZNF823	0.997594	0.996232	0.998958	0.000550591
HIBADH	1.0003	1.00013	1.00047	0.000551917
DDC	1.00056	1.00024	1.00088	0.000552344
ZNF775	0.998794	0.99811	0.999479	0.000556043
ANO1	1.00001	1	1.00001	0.000559699
PON1	1.01824	1.00784	1.02874	0.000560843
HK1	1.00003	1.00001	1.00005	0.00056453
CCDC18	0.99809	0.997004	0.999177	0.000574589
RASGEF1B	0.999435	0.999113	0.999757	0.00057709
RPL10L	1.00201	1.00087	1.00316	0.00057809
ANXA5	1.00003	1.00001	1.00005	0.000581073
SCML4	0.994919	0.992036	0.997811	0.000582096
PLS3	1.00005	1.00002	1.00008	0.000586582
MYO1H	0.993211	0.989349	0.997087	0.000608614
NLGN4Y	0.999254	0.998827	0.999682	0.000627441
LAT	0.985994	0.978054	0.993998	0.000628136
SLAMF6	0.998862	0.99821	0.999514	0.000629392
COMMD10	1.00058	1.00025	1.00091	0.000632825
PPP1R16B	0.999502	0.999216	0.999787	0.00063293
ADPRHL1	1.00052	1.00022	1.00083	0.000635236
PLAU	1.00001	1.00001	1.00002	0.000640942
NAT10	1.00008	1.00004	1.00013	0.000651123
CEACAM21	0.995434	0.992815	0.99806	0.000662518
PRSS12	0.999756	0.999615	0.999896	0.000665333
IKBKB	0.999707	0.999538	0.999876	0.000670599
STARD9	0.998581	0.997764	0.999399	0.00067473
PARN	1.00028	1.00012	1.00044	0.000681047
CYP2D6	0.99036	0.98484	0.99591	0.000681197
APP	1.00001	1	1.00001	0.000689741
GZMM	0.99706	0.995365	0.998758	0.000695812
MAP4K1	0.999317	0.998922	0.999712	0.000696613
DCBLD2	1.00006	1.00002	1.00009	0.00070031
IKZF3	0.999711	0.999544	0.999878	0.00070291
COPB1	1.00008	1.00003	1.00013	0.000703106
SDPR	1.00014	1.00006	1.00021	0.000718152
YWHAG	1.00003	1.00001	1.00005	0.000720779
RASGRF1	1.00177	1.00074	1.00279	0.000727543
FAM53B	0.999831	0.999733	0.999929	0.000728592
PGRMC1	1.0001	1.00004	1.00016	0.000729543
MMADHC	1.00012	1.00005	1.00019	0.000738851
SH2D1A	0.99806	0.996935	0.999187	0.000741086
HBQ1	1.00212	1.00089	1.00336	0.000742711
KRTAP20-2	1.16169	1.06479	1.26741	0.000744588
ABCB1	0.997093	0.995408	0.998782	0.000747586
TNFRSF12A	1.00005	1.00002	1.00008	0.000753922
RBM18	1.00035	1.00014	1.00055	0.000765545
ITK	0.99898	0.998387	0.999574	0.000769036
PLOD2	1.00005	1.00002	1.00008	0.000770633
VAT1L	1.0016	1.00067	1.00254	0.000785334
ZNF558	0.999198	0.99873	0.999667	0.000791591
SAP30L	0.999584	0.999341	0.999828	0.000812356
SPINK4	1.02229	1.00917	1.03558	0.00082124
PSMD10	1.00024	1.0001	1.00038	0.00082243
ANKRD44	0.999128	0.998617	0.999639	0.000831601
ZFP69	0.99696	0.995181	0.998742	0.000833262
RASAL3	0.999392	0.999035	0.999749	0.000844606
LCK	0.999529	0.999252	0.999806	0.000846532
NKX6-2	1.04179	1.01704	1.06715	0.000846595
CCNDBP1	1.00029	1.00012	1.00046	0.000848107
ZBTB49	0.995825	0.993374	0.998281	0.000873971
NKTR	0.999685	0.999499	0.99987	0.000881794
TLL2	1.00076	1.00031	1.00121	0.000889765
ZNF20	0.975149	0.960781	0.989732	0.000891193
VBP1	1.00022	1.00009	1.00034	0.000896261
MORF4L1	1.00006	1.00003	1.0001	0.000900969
SPESP1	1.00102	1.00042	1.00163	0.000900981
SMIM14	0.999855	0.99977	0.999941	0.000904154
WNT7A	1.00028	1.00011	1.00044	0.000920201
IL16	0.999529	0.999251	0.999808	0.000928785
MKRN3	1.0017	1.00069	1.0027	0.000937647
DDX19A	1.00036	1.00015	1.00057	0.000938505
ZDHHC4	1.00023	1.00009	1.00036	0.000950283
ZNF763	0.983672	0.974115	0.993324	0.000950992
FAM212B	0.999213	0.998746	0.99968	0.000958934
LCLAT1	1.00031	1.00012	1.00049	0.000981267
EIF5A2	1.00034	1.00014	1.00055	0.000983362
ZNF621	0.999077	0.998529	0.999626	0.000984277
WDFY4	0.999528	0.999248	0.999809	0.000985947
CORO1A	0.999893	0.999829	0.999957	0.000987896
KLRG1	0.990405	0.984737	0.996104	0.000990768
PAPPA2	1.00097	1.00039	1.00155	0.000991433
NUDT7	1.00377	1.00152	1.00602	0.00099312
ANAPC10	1.00134	1.00054	1.00213	0.000993604
IL1RAP	1.00007	1.00003	1.00011	0.00100936
UFM1	1.00017	1.00007	1.00028	0.00101405
FAM160B2	0.999782	0.999653	0.999912	0.00101667
FADD	1.00011	1.00004	1.00017	0.00102557
ZMAT1	0.997761	0.996426	0.999097	0.00102711
GPR171	0.996781	0.994862	0.998705	0.00104542
CD3E	0.999723	0.999558	0.999889	0.00104803
OSR2	0.999467	0.999148	0.999786	0.00105552
SFTPB	1.00049	1.0002	1.00079	0.00105788
MEIS1	0.99951	0.999217	0.999803	0.00106186
DDX3Y	0.999856	0.99977	0.999942	0.00106917
SNX6	1.00011	1.00004	1.00017	0.00106973
CDKN2A	0.999924	0.999878	0.999969	0.00108349
COX7A2L	1.00016	1.00006	1.00025	0.00110056
CHD1L	1.00031	1.00012	1.0005	0.00113756
GFY	1.00029	1.00012	1.00047	0.0011422
NFU1	1.00047	1.00019	1.00076	0.00114914
ODF4	0.908558	0.857497	0.96266	0.00115626
PSMD14	1.00012	1.00005	1.00019	0.00116287
CABS1	1.05091	1.01988	1.08288	0.00116362
TMEM144	1.00148	1.00059	1.00238	0.00116766
STAMBP	1.00026	1.0001	1.00042	0.00116908
SLC26A1	0.994968	0.991942	0.998004	0.00117206
ESD	1.00015	1.00006	1.00024	0.00118188
CXCL5	1.0001	1.00004	1.00016	0.00119213
S1PR4	0.998754	0.998	0.999507	0.00119318
ZFP3	0.998808	0.998088	0.99953	0.0012055
UBASH3A	0.997558	0.996083	0.999036	0.00120866
FITM2	1.00089	1.00035	1.00143	0.00120997
VWCE	0.992852	0.988547	0.997176	0.00121323
ZNF589	0.999263	0.998817	0.99971	0.00121568
CD27	0.999294	0.998867	0.999722	0.00121909
CD40LG	0.992267	0.987589	0.996967	0.00128184
C7orf25	1.01122	1.00437	1.01811	0.00130031
NUDT11	1.00046	1.00018	1.00075	0.00130032
HOXA10	1.00072	1.00028	1.00116	0.00130703
UNC50	1.00046	1.00018	1.00074	0.00131168
HNRNPC	1.00004	1.00001	1.00006	0.00133632
FGF9	1.00411	1.0016	1.00663	0.00133849
CWC22	1.00039	1.00015	1.00063	0.00134989
SET	1.00003	1.00001	1.00005	0.00135094
USP49	0.998533	0.997637	0.99943	0.00135851
SERINC3	1.00006	1.00002	1.0001	0.00135936
L1CAM	1.00006	1.00002	1.0001	0.00136177
EPHX3	0.999814	0.999701	0.999928	0.00137757
ASS1	1.00002	1.00001	1.00004	0.00137908
NOG	1.00046	1.00018	1.00074	0.00139756
PTDSS1	1.00006	1.00002	1.00009	0.00139883
SPCS3	1.0001	1.00004	1.00015	0.00140454
IPO5	1.00006	1.00002	1.00009	0.00140982
JAK3	0.999702	0.999519	0.999885	0.0014191
CLEC9A	0.98864	0.981724	0.995606	0.00142647
SLAMF1	0.99829	0.99724	0.999341	0.00143209
BOD1	1.00025	1.0001	1.0004	0.0014343
KLRB1	0.99721	0.995497	0.998926	0.00144923
ATP2A3	0.999824	0.999715	0.999932	0.00145532
EIF3E	1.00003	1.00001	1.00005	0.00145956
FRAT1	0.997868	0.996556	0.999182	0.00148146
C10orf35	1.00076	1.00029	1.00122	0.00148805
P2RY8	0.999106	0.998555	0.999658	0.00149517
TMEM220	0.997208	0.995486	0.998932	0.00151447
ZNF862	0.99893	0.99827	0.999591	0.00151527
DPY19L3	0.999258	0.998799	0.999717	0.00151993
RBM33	0.999667	0.999461	0.999873	0.00152996
TIMP4	1.00411	1.00157	1.00667	0.00154243
NPM1	1.00002	1.00001	1.00003	0.00154392
ACADL	1.00052	1.0002	1.00084	0.00154493
ATF6	1.00019	1.00007	1.00031	0.00154748
DNAH1	0.99829	0.997233	0.999349	0.00154895
BATF	0.999025	0.998421	0.999629	0.0015672
FAM193A	0.999426	0.999071	0.999782	0.00156807
RTN4R	1.00042	1.00016	1.00068	0.00157113
EZH1	0.999358	0.99896	0.999756	0.00158188
RGS13	0.982732	0.972151	0.993429	0.00161334
ING5	0.99932	0.998897	0.999743	0.00161472
CCR7	0.99936	0.998963	0.999758	0.00161762
ACAP1	0.999521	0.999223	0.999819	0.00162971
ZNF791	0.999242	0.99877	0.999714	0.00165868
HNRNPH2	1.00013	1.00005	1.00021	0.00166006
KCNJ15	1.00011	1.00004	1.00018	0.00166393
SPANXA1	1.04336	1.01612	1.07132	0.00166408
DARS	1.00012	1.00005	1.0002	0.00166707
ZNF347	0.998505	0.997574	0.999437	0.00166787
KCNG1	1.00043	1.00016	1.0007	0.00166838
FRMD4A	0.999507	0.9992	0.999814	0.00166925
PJA1	1.00024	1.00009	1.00039	0.00167739
PPFIBP2	0.999784	0.999649	0.999919	0.00168775
SLC30A10	1.00235	1.00088	1.00383	0.00169776
OLFM4	1.00005	1.00002	1.00009	0.00178016
GPR174	0.992414	0.987685	0.997166	0.00178268
CD247	0.999248	0.998776	0.99972	0.00179688
CCL1	1.01336	1.00495	1.02184	0.00180995
SIRPG	0.998655	0.99781	0.9995	0.00182115
TM9SF2	1.00005	1.00002	1.00009	0.00184447
QPCT	1.00024	1.00009	1.00039	0.00185084
DDX18	1.00011	1.00004	1.00017	0.001882
SPG21	1.00018	1.00007	1.00029	0.00189162
SFTPA2	1.0004	1.00015	1.00065	0.00192049
DNAJA2	1.00015	1.00005	1.00024	0.0019258
BFAR	1.00021	1.00008	1.00035	0.00195364
TAS2R3	0.813923	0.71444	0.927258	0.00196549
RSL24D1	1.0001	1.00004	1.00017	0.00197237
GNG7	0.99803	0.996784	0.999277	0.00197413
RAB11B	0.999844	0.999745	0.999943	0.0019768
ZNF541	0.999085	0.998505	0.999665	0.00198062
ZFAND1	1.00023	1.00009	1.00038	0.00199223
TMED7-TICAM2	1.01176	1.00429	1.01929	0.00199263
ASNS	1.00009	1.00003	1.00015	0.00199382
C15orf53	0.927892	0.884886	0.972988	0.0019956
ZNF134	1.00048	1.00017	1.00078	0.00202028
GPN3	1.00049	1.00018	1.00081	0.00202134
STARD3NL	1.00022	1.00008	1.00036	0.00202146
EXPH5	0.999624	0.999386	0.999863	0.00202411
TWISTNB	1.00035	1.00013	1.00058	0.00203332
USP41	1.02047	1.00742	1.0337	0.00203805
LSM12	1.00109	1.0004	1.00178	0.00204098
DHCR7	1.00002	1.00001	1.00003	0.00204302
CCDC88C	0.999853	0.99976	0.999946	0.00204302
P2RY10	0.997481	0.995884	0.999082	0.00204573
CD226	0.997591	0.996063	0.999122	0.00205593
SIT1	0.998304	0.997227	0.999382	0.00206032
RELT	1.00026	1.0001	1.00043	0.00207057
ALX1	1.00055	1.0002	1.00089	0.0020779
C19orf57	0.999112	0.998546	0.999677	0.002091
SLC7A6OS	1.00174	1.00063	1.00286	0.00209323
MAST4	0.999922	0.999873	0.999972	0.00209364
NUGGC	0.996232	0.993839	0.998631	0.0020947
GLTSCR1L	0.999502	0.999185	0.999819	0.00210863
CCDC146	0.999074	0.998484	0.999664	0.0021158
MLLT1	0.999816	0.999699	0.999934	0.0021174
GARS	1.00006	1.00002	1.00009	0.00212156
CGA	1.00165	1.0006	1.0027	0.00213547
STIP1	1.00003	1.00001	1.00005	0.00214699
ZNF44	0.998524	0.997583	0.999467	0.00214802
CRTAM	0.996618	0.994464	0.998777	0.00214827
CEBPZOS	1.00026	1.0001	1.00043	0.00215736
TIGIT	0.999403	0.999022	0.999784	0.00216054
MDGA2	1.00381	1.00137	1.00625	0.00216321
IKZF1	0.999656	0.999436	0.999876	0.00218467
WBP5	1.00012	1.00004	1.0002	0.00218883
NEU1	1.00015	1.00005	1.00024	0.00221345
DIABLO	1.00125	1.00045	1.00205	0.00221994
CD28	0.998524	0.997579	0.999469	0.00222103
EOMES	0.997886	0.996534	0.99924	0.0022239
SLC12A3	0.982393	0.97127	0.993644	0.00223152
CCR4	0.998513	0.99756	0.999466	0.00223883
UTP14A	1.00028	1.0001	1.00046	0.00224324
GAK	0.999864	0.999776	0.999951	0.00224639
ITGA5	1.00002	1.00001	1.00003	0.00224739
OAF	1.00012	1.00004	1.00019	0.00225609
GPR114	0.998569	0.997651	0.999487	0.00226166
ITFG1	1.0002	1.00007	1.00032	0.00228574
GRAP	0.992256	0.987309	0.997227	0.0022973
NOB1	1.00017	1.00006	1.00027	0.00230598
VPS35	1.00008	1.00003	1.00014	0.0023065
TTC21A	0.995314	0.99231	0.998326	0.00231797
ZC3H4	0.999699	0.999505	0.999893	0.00231937
CCDC64	0.999709	0.999522	0.999896	0.00232446
PHF5A	1.00018	1.00006	1.0003	0.0023273
OXCT2	1.00286	1.00102	1.0047	0.00233034
PSMD11	1.00007	1.00003	1.00012	0.0023464
PPIL4	1.00053	1.00019	1.00087	0.00237989
GNPDA1	1.0003	1.00011	1.0005	0.0023948
KDELC1	1.00067	1.00024	1.0011	0.00239601
ATXN7	0.999521	0.999213	0.99983	0.00239792
RSPRY1	1.00034	1.00012	1.00056	0.00241387
PDIK1L	0.999178	0.998648	0.999709	0.00242441
AMZ2	1.00021	1.00008	1.00035	0.00242501
ZYG11A	0.998514	0.997555	0.999475	0.00243159
DYNC1I1	1.00058	1.0002	1.00095	0.00243193
LRRTM4	1.01093	1.00385	1.01806	0.00243269
PIK3C2B	0.999698	0.999502	0.999893	0.00243918
YIPF5	1.00021	1.00007	1.00035	0.0024394
CCNC	1.00013	1.00005	1.00022	0.00246325
AC069368.3	1.07442	1.02562	1.12553	0.00247053
CAV2	1.00004	1.00001	1.00007	0.00247596
GPR18	0.99357	0.989428	0.99773	0.00247808
ZNF554	0.997548	0.995961	0.999137	0.00249914
CDC27	1.00019	1.00007	1.00031	0.00251246
CD3D	0.999436	0.99907	0.999802	0.00251409
OLA1	1.00007	1.00002	1.00011	0.00251794
DNAH14	1.00109	1.00038	1.00179	0.00252682
TBC1D2	1.00006	1.00002	1.0001	0.00253012
TSSK4	0.990305	0.984059	0.99659	0.00254499
GTSF1L	0.941782	0.9058	0.979194	0.00254588
IMPG2	0.975587	0.960051	0.991375	0.00254835
SNRNP27	1.0006	1.00021	1.00099	0.00256468
SAMD3	0.993949	0.990035	0.997879	0.00257005
THBS1	1.00001	1	1.00001	0.00257038
FCRLA	0.998242	0.997101	0.999385	0.00257862
ZNF846	0.998088	0.996846	0.999331	0.00258442
RGL4	0.992583	0.987788	0.997401	0.00258494
ICOS	0.998664	0.997796	0.999533	0.00259883
TMEM261	1.00016	1.00006	1.00027	0.00260065
ROBO1	0.999925	0.999876	0.999974	0.00260587
LY9	0.998338	0.997256	0.999422	0.00264828
DCP2	0.999552	0.999261	0.999844	0.00265346
DDX10	1.00023	1.00008	1.00038	0.00266989
EMC7	1.00022	1.00008	1.00036	0.0027014
RRN3	1.00032	1.00011	1.00053	0.00270979
FAM177B	0.986906	0.978439	0.995445	0.0027132
TMEM106B	1.00011	1.00004	1.00019	0.0027274
KIR3DL2	0.958763	0.932718	0.985536	0.00272812
GMIP	0.999477	0.999135	0.999819	0.00272871
RP11-244H3.4	0.941868	0.905683	0.979498	0.00273246
FAM78A	0.999258	0.998772	0.999743	0.00273749
FUT7	0.996804	0.994718	0.998894	0.00273783
PRAMEF6	1.01177	1.00405	1.01955	0.00275762
UVSSA	0.998745	0.997923	0.999567	0.00276722
ZNF546	0.995614	0.992751	0.998484	0.00276737
ATXN7L2	0.997837	0.996422	0.999253	0.00277098
NUPL2	1.00051	1.00018	1.00085	0.00277785
RASGRP2	0.998306	0.997197	0.999417	0.00280019
TNFRSF25	0.999639	0.999402	0.999876	0.00281001
TYK2	0.999831	0.99972	0.999942	0.00282175
ZFY	0.999554	0.999261	0.999847	0.00283499
POLR1D	1.00007	1.00002	1.00011	0.00285148
SASH3	0.999692	0.99949	0.999895	0.00286437
TXLNA	0.999878	0.999798	0.999958	0.00287869
TESPA1	0.997945	0.996595	0.999296	0.00288716
TMLHE	1.00114	1.00039	1.00189	0.00289295
PCK1	1.00052	1.00018	1.00086	0.0028931
ABL2	1.00012	1.00004	1.00019	0.00292465
PPME1	1.00006	1.00002	1.0001	0.00293413
RAB5C	1.00018	1.00006	1.00029	0.00295468
PTPLAD1	1.00011	1.00004	1.00018	0.00296164
EIF3J	1.00015	1.00005	1.00025	0.00296192
CELSR3	0.999675	0.99946	0.999889	0.0029668
FGF14	1.00121	1.00041	1.002	0.00296873
DNAJB4	1.00023	1.00008	1.00037	0.00298581
TATDN2	0.99953	0.99922	0.99984	0.00299766
C1QL1	1.00063	1.00021	1.00104	0.00301521
SLC25A17	1.00035	1.00012	1.00057	0.0030165
ARHGAP9	0.999456	0.999097	0.999816	0.00302446
TMEM55A	1.00075	1.00026	1.00125	0.00303157
DTX1	0.998922	0.998209	0.999635	0.0030525
SREK1	0.999697	0.999497	0.999898	0.00305952
CYTIP	0.999544	0.999242	0.999846	0.00309391
ZNF497	0.994618	0.991065	0.998184	0.00312252
PSEN2	1.00046	1.00016	1.00077	0.00312689
PIGF	1.00094	1.00032	1.00157	0.00312931
SFTPA1	1.00048	1.00016	1.00081	0.00313146
SEMA3A	1.00021	1.00007	1.00035	0.00314302
ZMAT2	1.00013	1.00004	1.00021	0.00315321
WDR48	0.999596	0.999328	0.999864	0.00315744
SUPT3H	1.00087	1.00029	1.00144	0.00321533
GAST	1.00056	1.00019	1.00094	0.00323741
GNRH1	0.993591	0.989347	0.997854	0.00324563
PSMD2	1.00002	1.00001	1.00003	0.00326723
LRRC9	1.0094	1.00313	1.01572	0.00326864
TCEAL1	1.00081	1.00027	1.00135	0.00327519
NFIA	0.999753	0.999588	0.999917	0.00327724
WDR54	1.00019	1.00006	1.00032	0.00329001
ARHGAP15	0.99876	0.997933	0.999587	0.00329879
AVPR2	0.990064	0.983489	0.996683	0.00331118
INPP5B	0.999198	0.998663	0.999733	0.0033143
DSCAM	1.00116	1.00039	1.00194	0.0033178
TBCK	1.00051	1.00017	1.00085	0.00333166
RP11-216L13.17	1.06552	1.02131	1.11164	0.00333493
PRR11	1.00019	1.00006	1.00032	0.00333829
PNO1	1.00024	1.00008	1.00039	0.00337063
SNX22	0.997692	0.996152	0.999235	0.00337465
CPNE5	0.999178	0.998629	0.999728	0.00338399
ZP1	1.00869	1.00287	1.01455	0.00338785
C1orf228	0.993677	0.989466	0.997905	0.00341434
CCZ1B	1.00095	1.00031	1.00158	0.00342716
WBSCR28	1.00644	1.00212	1.01078	0.00347122
ITGAL	0.999775	0.999625	0.999926	0.00347296
CT45A5	1.02605	1.0085	1.04391	0.00347779
ZNF837	0.995995	0.993315	0.998682	0.00350914
KNSTRN	1.00034	1.00011	1.00057	0.00352479
PDIA6	1.00004	1.00001	1.00006	0.00352527
CCR6	0.978033	0.963545	0.99274	0.00353533
HMHA1	0.999804	0.999672	0.999936	0.00353656
CDK19	0.999583	0.999304	0.999863	0.00355206
SENP7	0.999219	0.998695	0.999744	0.0035582
GIMAP7	0.99925	0.998746	0.999754	0.00356195
RMDN3	1.00029	1.00009	1.00048	0.00356861
SYT6	1.00333	1.00109	1.00558	0.003575
WNK3	0.997867	0.996435	0.999302	0.00357823
C17orf107	0.997953	0.996577	0.99933	0.00359322
CD96	0.999355	0.998921	0.999789	0.00359359
TRMT12	1.00047	1.00015	1.00078	0.00359999
CCDC126	1.00084	1.00028	1.00141	0.00361199
AGPAT6	0.99982	0.999699	0.999941	0.00364442
CD37	0.999696	0.999491	0.999901	0.0036581
PGM3	1.00015	1.00005	1.00025	0.00366397
NCR3	0.992081	0.986774	0.997416	0.00366839
CPVL	1.00022	1.00007	1.00037	0.00369955
CELF2	0.999713	0.999519	0.999907	0.00371175
HPSE2	1.00362	1.00117	1.00607	0.00372763
OR52N4	0.925257	0.877934	0.97513	0.00372979
SMS	1.00005	1.00002	1.00009	0.00376767
ZNF335	0.999492	0.999148	0.999836	0.00377212
CENPC	0.999393	0.998983	0.999804	0.00377935
CD52	0.99972	0.999531	0.99991	0.00378378
CLECL1	0.989622	0.982654	0.996639	0.0038043
ETFA	1.00013	1.00004	1.00021	0.00381159
MYH11	1.00003	1.00001	1.00004	0.00381455
E2F2	0.999617	0.999358	0.999877	0.00382437
LAPTM4A	1.00004	1.00001	1.00006	0.00385178
TNFSF8	0.996554	0.994224	0.99889	0.00385951
CSAD	0.999375	0.998951	0.999799	0.0038752
FAIM3	0.999224	0.998697	0.99975	0.00387638
PRKCB	0.999426	0.999037	0.999816	0.00387974
NLRP1	0.999849	0.999746	0.999951	0.00389154
CIRH1A	1.00014	1.00004	1.00023	0.0039155
NUDCD1	1.00023	1.00007	1.00039	0.00391566
MAPK9	1.00038	1.00012	1.00063	0.00392483
CXCR5	0.979413	0.965661	0.99336	0.00393421
GRAP2	0.998514	0.997506	0.999524	0.00393828
FGD2	0.999254	0.998747	0.999761	0.00394073
RGS5	0.999867	0.999776	0.999957	0.00395252
TBL2	1.0002	1.00006	1.00033	0.00396041
SLFN12L	0.995865	0.993061	0.998677	0.00397375
VPS26A	1.00016	1.00005	1.00026	0.00399037
TSSK3	0.962076	0.937084	0.987736	0.00399144
KIAA0430	0.999792	0.999651	0.999934	0.00399726
NIP7	1.00016	1.00005	1.00027	0.00402913
INPP5D	0.999798	0.99966	0.999936	0.00404569
ATG5	1.00022	1.00007	1.00037	0.00405785
MASP1	0.99955	0.999243	0.999857	0.00406366
OSGIN2	1.00041	1.00013	1.0007	0.00406531
RHOXF2	1.12366	1.03774	1.21668	0.00406708
IMMP2L	1.00114	1.00036	1.00192	0.00406919
MZF1	0.999244	0.998728	0.99976	0.00407333
RP11-196G11.1	1.02507	1.0079	1.04254	0.00407431
KIAA1683	0.997829	0.996351	0.99931	0.00408301
ABCD2	0.994774	0.991224	0.998338	0.0040839
CXorf56	1.00041	1.00013	1.00069	0.00409804
HAUS6	1.0001	1.00003	1.00016	0.00411374
RRAGA	1.00006	1.00002	1.0001	0.00411824
AGPS	1.0001	1.00003	1.00017	0.00412399
C1orf43	1.00006	1.00002	1.00011	0.00412782
CCDC97	0.999663	0.999434	0.999893	0.00412796
TOMM20	1.00004	1.00001	1.00007	0.00413548
HSF5	0.931893	0.888027	0.977926	0.00413962
CBFA2T2	0.999778	0.999626	0.99993	0.00416937
UCHL1	1.00004	1.00001	1.00007	0.00417091
PPP6R3	1.00007	1.00002	1.00012	0.00417487
ZDHHC9	1.0001	1.00003	1.00017	0.0041749
GIMAP5	0.994988	0.991573	0.998415	0.00418002
AIMP1	1.00021	1.00006	1.00035	0.00418493
CD2	0.999712	0.999516	0.999909	0.00418532
G2E3	1.00034	1.00011	1.00058	0.00419101
WDR19	0.999108	0.998498	0.999719	0.00420946
TTC30A	1.00066	1.00021	1.00111	0.0042134
AKAP5	0.997737	0.99619	0.999286	0.00421466
NPS	1.00012	1.00004	1.0002	0.00422199
CALCB	1.00646	1.00203	1.01092	0.00423889
HIST1H2BH	1.00181	1.00057	1.00306	0.00424694
PRDX3	1.0001	1.00003	1.00017	0.00425951
DUSP16	0.999817	0.999692	0.999943	0.00427786
ZBTB37	0.998866	0.998088	0.999644	0.00428211
LRRC48	0.99642	0.99397	0.998875	0.00428569
GALNT14	1.00019	1.00006	1.00031	0.00429332
CYCS	1.00004	1.00001	1.00008	0.00430659
PARK2	1.00171	1.00054	1.00289	0.00431563
CENPBD1	1.00171	1.00054	1.00289	0.0043166
SOX1	1.00193	1.0006	1.00326	0.00433688
HSPA5	1.00001	1	1.00002	0.00434398
FAM162B	0.989621	0.982549	0.996744	0.00435598
TMEM14B	1.00015	1.00005	1.00025	0.00436459
IL1A	1.00003	1.00001	1.00006	0.00436503
RANBP3	0.99975	0.999578	0.999922	0.00437588
MESDC2	1.00019	1.00006	1.00032	0.00437908
PFKM	1.00006	1.00002	1.00009	0.00437949
SCGN	1.0002	1.00006	1.00034	0.0044201
USP12	1.00032	1.0001	1.00054	0.00442176
MAGT1	1.00007	1.00002	1.00011	0.00442573
SLC6A15	1.00012	1.00004	1.00021	0.0044288
IRF8	0.99968	0.99946	0.999901	0.00444533
ALG11	1.00163	1.00051	1.00276	0.00444568
KCNH6	1.00025	1.00008	1.00043	0.00445325
FAM129C	0.993555	0.989137	0.997993	0.00446256
TMEM185B	1.00018	1.00006	1.00031	0.00449653
TCEANC2	0.998833	0.998028	0.999638	0.00451027
PRAME	1.00011	1.00003	1.00018	0.00451061
ZNF491	0.985677	0.975909	0.995544	0.00452831
CANX	1.00002	1.00001	1.00003	0.00454206
CRIPAK	0.998626	0.997677	0.999575	0.0045586
MSANTD4	1.00017	1.00005	1.00028	0.00456084
TCEB3CL2	3.46959	1.46845	8.19779	0.00457168
TSPAN5	1.00011	1.00003	1.00019	0.00457892
PEX5L	1.00388	1.0012	1.00658	0.00458636
PNMA1	1.00017	1.00005	1.00028	0.00458751
TMED2	1.00003	1.00001	1.00005	0.00458971
PKD1	0.999853	0.999751	0.999955	0.00463914
COPS2	1.00015	1.00005	1.00025	0.0046428
NALCN	1.00082	1.00025	1.00138	0.00464507
MAP3K6	0.999897	0.999826	0.999968	0.00464997
MYO9B	0.999884	0.999803	0.999964	0.00468355
SLC5A9	0.978288	0.963516	0.993288	0.00469105
BARD1	0.99942	0.999017	0.999822	0.00473679
IDO2	0.983399	0.972037	0.994893	0.00474892
DMRTA2	0.999263	0.998752	0.999775	0.00476401
PHYH	1.00033	1.0001	1.00057	0.00477598
GIMAP1	0.998845	0.998043	0.999648	0.00479723
DTHD1	0.993843	0.989586	0.998118	0.00480156
ARL17A	0.983139	0.971583	0.994833	0.00482068
FAM229A	0.995848	0.992971	0.998734	0.00482526
XCR1	0.998083	0.996751	0.999417	0.00485919
SLC4A1AP	1.00045	1.00014	1.00076	0.00487197
HECTD4	0.999776	0.999619	0.999932	0.00488653
LIPE	0.999268	0.998758	0.999778	0.00492476
SLC15A4	1.00044	1.00013	1.00075	0.00493195
CBX3	1.00004	1.00001	1.00007	0.00493241
PTGR1	1.00002	1.00001	1.00004	0.00493281
SLC25A5	1.00002	1	1.00003	0.00493512
SPACA4	0.985972	0.976306	0.995733	0.00494131
PRSS35	1.00453	1.00137	1.0077	0.00494193
ZNF250	0.999268	0.998758	0.999779	0.00497638
LTA	0.995372	0.992155	0.998599	0.00497723
TPM3	1.00002	1.00001	1.00003	0.00497723
CT45A10	1.00092	1.00028	1.00157	0.0049865
CALM2	1.00002	1.00001	1.00003	0.00504991
SLC12A1	1.00305	1.00092	1.0052	0.00507806
CXCR6	0.999356	0.998905	0.999807	0.0051012
CNIH4	1.00019	1.00006	1.00032	0.00510562
AMZ1	1.00092	1.00028	1.00156	0.00511404
ZNF562	0.9997	0.99949	0.99991	0.00512655
KCNA3	0.996375	0.993843	0.998912	0.00513541
TMEM97	1.00019	1.00006	1.00033	0.00515149
MCEMP1	1.00174	1.00052	1.00297	0.00519266
AZIN1	1.00005	1.00002	1.00009	0.00519302
SUSD1	1.00073	1.00022	1.00124	0.00520329
TNFRSF4	0.998824	0.998	0.999649	0.00521115
C22orf46	0.999466	0.999091	0.999841	0.00522255
EZH2	0.999752	0.999578	0.999926	0.00524706
KAT6A	0.999904	0.999836	0.999971	0.00525031
CTC-479C5.12	0.996601	0.99422	0.998987	0.00525416
UTP6	1.00026	1.00008	1.00043	0.0052581
WAS	0.999503	0.999155	0.999852	0.00526797
CCL26	1.00016	1.00005	1.00027	0.00526859
GLTSCR1	0.999251	0.998726	0.999777	0.00527238
SFXN1	1.00014	1.00004	1.00024	0.00527288
NFKBID	0.998367	0.997221	0.999514	0.00527499
KLRC4	0.938636	0.897777	0.981354	0.00528973
SLC39A11	1.00019	1.00006	1.00032	0.00529357
NDNL2	1.00041	1.00012	1.0007	0.00534192
NECAP1	1.00031	1.00009	1.00054	0.00534385
TVP23A	0.993103	0.988279	0.997951	0.0053462
GP5	0.955622	0.925577	0.986643	0.00535303
PLA2G2D	0.999095	0.998459	0.999732	0.00535641
EIF2A	1.00008	1.00002	1.00014	0.00539059
NUPL1	1.00021	1.00006	1.00036	0.00539096
SYCP2	0.999731	0.999541	0.99992	0.00542121
FCRL4	0.982876	0.97098	0.994919	0.00543755
PIP5K1A	1.00015	1.00004	1.00025	0.00545802
RAB6A	1.00003	1.00001	1.00005	0.00546656
TNFRSF13B	0.995338	0.992062	0.998625	0.00546753
DPH6	1.00104	1.00031	1.00177	0.00547619
ITPRIPL1	0.998858	0.998053	0.999664	0.00547695
GSAP	0.999523	0.999186	0.999859	0.00548328
PFN2	1.00003	1.00001	1.00005	0.00548654
ARHGAP30	0.99979	0.999641	0.999938	0.00548684
HERC1	0.999815	0.999684	0.999945	0.00549135
SDHC	1.00013	1.00004	1.00022	0.00549869
HADHB	1.00008	1.00002	1.00014	0.00550676
NCR1	0.986606	0.977255	0.996047	0.00551656
HSP90AA1	1.00001	1	1.00001	0.00552132
AHRR	0.999071	0.998415	0.999727	0.00552714
MAU2	0.999769	0.999607	0.999932	0.00553554
AC008686.1	0.897883	0.832049	0.968925	0.00556315
CXCR3	0.999097	0.99846	0.999736	0.00556998
BLK	0.998143	0.996832	0.999456	0.00557507
GCSAM	0.99878	0.997918	0.999643	0.00560716
LINGO3	0.982878	0.970936	0.994967	0.00562251
HSP90AB1	1.00001	1	1.00001	0.00564157
TMEM87B	1.00019	1.00006	1.00033	0.00566342
HEATR3	1.00041	1.00012	1.00071	0.00567415
AMIGO2	1.00007	1.00002	1.00013	0.00567921
NLRP2	1.00009	1.00003	1.00015	0.00567929
AURKA	1.00019	1.00005	1.00032	0.00568273
ZNF81	0.998682	0.997748	0.999616	0.00568729
GANAB	1.00002	1.00001	1.00003	0.00570002
CHRNA2	1.00096	1.00028	1.00164	0.0057149
PPARGC1B	0.999538	0.999211	0.999866	0.00572151
TP73	0.999813	0.99968	0.999946	0.00573224
BCL11A	0.999772	0.999611	0.999934	0.00573656
SMARCA1	1.00013	1.00004	1.00022	0.00574167
CIAPIN1	1.00014	1.00004	1.00024	0.00574367
C12orf56	0.999134	0.99852	0.999749	0.00576043
HNRNPK	1.00003	1.00001	1.00005	0.00578008
SMNDC1	1.00034	1.0001	1.00059	0.0057845
FOXB1	1.00574	1.00166	1.00984	0.00579191
HOXB8	1.00159	1.00046	1.00272	0.00580162
BTG3	0.999807	0.99967	0.999944	0.00581217
PDCD10	1.00012	1.00004	1.00021	0.00583391
FAM102B	0.999639	0.999382	0.999896	0.0058588
YPEL1	0.996814	0.994552	0.999081	0.00589565
GDE1	1.00018	1.00005	1.00031	0.00590358
MGA	0.999794	0.999648	0.999941	0.0059055
NETO2	1.00014	1.00004	1.00025	0.00590591
BFSP2	0.978734	0.963866	0.993832	0.00591987
TMEM163	1.00066	1.00019	1.00112	0.00593606
MSANTD3	1.00021	1.00006	1.00036	0.00593816
TRIM32	1.00034	1.0001	1.00059	0.00595881
PXN	1.00003	1.00001	1.00005	0.00595984
CFAP44	0.999078	0.998422	0.999735	0.00596036
PLXNB1	0.999908	0.999842	0.999974	0.00596838
GHRH	1.00033	1.0001	1.00057	0.00598392
GINM1	1.00022	1.00006	1.00038	0.00605162
SBF1	0.999929	0.999879	0.99998	0.00605722
PTPRC	0.999902	0.999832	0.999972	0.00610566
CCDC169-SOHLH2	1.11808	1.03235	1.21094	0.0061066
CD48	0.999631	0.999367	0.999895	0.00611188
EMC4	1.00014	1.00004	1.00023	0.00611443
GAPT	0.99563	0.992517	0.998753	0.00612945
PAOX	0.999043	0.998358	0.999727	0.00613699
VAMP1	0.998714	0.997795	0.999634	0.00616255
GPS2	0.997222	0.995238	0.99921	0.0061844
OTOL1	1.04943	1.01379	1.08633	0.00620292
RHOXF2B	1.32006	1.08188	1.61068	0.00623385
CTC1	0.9994	0.998971	0.99983	0.00624488
LXN	1.00022	1.00006	1.00037	0.00626571
PDCL2	1.0048	1.00135	1.00825	0.00628239
FUCA1	0.999738	0.999551	0.999926	0.00629308
RNF14	1.00027	1.00008	1.00046	0.0063106
PHACTR4	0.999799	0.999655	0.999943	0.00632609
MROH7	0.99348	0.988824	0.998158	0.00634748
RARA	1.00024	1.00007	1.00041	0.00634769
FBXO7	1.00016	1.00005	1.00028	0.00635782
DDX26B	0.999148	0.998537	0.99976	0.00636884
OR5M11	1.0537	1.01484	1.09406	0.00637301
ZNF33A	0.999526	0.999185	0.999867	0.00638386
PTPN22	0.99894	0.998179	0.999702	0.00639536
PIGP	1.00069	1.00019	1.00118	0.00639815
KIF1A	1.00023	1.00006	1.00039	0.00639964
DCDC2	1.00095	1.00027	1.00164	0.00640179
GPR56	1.00003	1.00001	1.00004	0.00640224
ZFP14	0.998494	0.997412	0.999577	0.00643498
DCBLD1	1.00008	1.00002	1.00013	0.00643733
LYL1	0.998186	0.996883	0.999491	0.00643943
CD3G	0.999155	0.998548	0.999763	0.00646049
MPL	0.975117	0.957594	0.992962	0.00646231
IPCEF1	0.998016	0.99659	0.999444	0.0064851
AXL	1.00005	1.00002	1.00009	0.00649164
DUSP3	1.0001	1.00003	1.00017	0.00650922
MSL3	0.999539	0.999207	0.999871	0.00652138
AHDC1	0.999869	0.999774	0.999963	0.0065346
BRINP1	1.0019	1.00053	1.00328	0.00654975
FCRL1	0.990371	0.983485	0.997306	0.00657138
VAMP7	1.00022	1.00006	1.00037	0.00658355
KLRC3	0.914577	0.857502	0.975451	0.00660854
LHX1	1.00096	1.00027	1.00166	0.00662526
SH3BP5L	0.999719	0.999516	0.999922	0.00663501
CXorf65	0.981981	0.969173	0.994959	0.00663852
MAEL	1.00051	1.00014	1.00089	0.00664138
ITGA3	1.00001	1	1.00001	0.0066429
ADSL	1.00008	1.00002	1.00015	0.00664667
C16orf52	1.00079	1.00022	1.00136	0.00665952
FGG	1.00137	1.00038	1.00236	0.00668436
SP9	0.996237	0.993526	0.998955	0.00668792
MTHFR	0.999715	0.999509	0.999921	0.00670135
STK26	1.00026	1.00007	1.00044	0.00670783
GRPR	1.01003	1.00276	1.01736	0.0067711
C5orf15	1.00015	1.00004	1.00026	0.00678854
PYHIN1	0.997682	0.996006	0.99936	0.00679472
SFTPC	1.00036	1.0001	1.00063	0.00680851
LEAP2	0.990484	0.983649	0.997367	0.00680905
TM4SF1	1.00001	1	1.00003	0.00682506
SLC35G6	0.915313	0.858473	0.975917	0.00682562
KIAA1191	1.00013	1.00004	1.00023	0.0068284
ARHGAP4	0.999863	0.999763	0.999962	0.00683684
MRPS23	1.00014	1.00004	1.00024	0.00684688
PPIP5K2	0.999598	0.999306	0.999889	0.00685745
MBNL3	0.999727	0.999529	0.999925	0.00688618
MINPP1	1.00045	1.00012	1.00077	0.00689455
GTF2F2	1.00024	1.00006	1.00041	0.00690562
CHAC2	1.00094	1.00026	1.00162	0.00690703
SSX4B	1.38131	1.09269	1.74618	0.00690955
PLCB2	0.999464	0.999076	0.999853	0.00693269
NUP37	1.00026	1.00007	1.00045	0.00694177
GPR123	1.00221	1.0006	1.00381	0.00695619
ALDH2	0.999949	0.999913	0.999986	0.00697843
TSPAN16	0.906259	0.843701	0.973457	0.00699435
LMO4	0.999925	0.999871	0.99998	0.0069963
GOT2	1.00005	1.00001	1.00008	0.00701093
ABCB7	1.00061	1.00017	1.00105	0.007036
TMEM105	1.0017	1.00046	1.00293	0.00706508
TMEM136	1.00177	1.00048	1.00307	0.00708623
IFT20	1.00051	1.00014	1.00089	0.00710416
ANKRD40	1.00026	1.00007	1.00045	0.00711033
CHRNA5	1.00159	1.00043	1.00275	0.00712204
PLAA	1.00016	1.00004	1.00027	0.00713326
DSG2	1.00002	1.00001	1.00004	0.00714077
GPN1	1.00012	1.00003	1.00021	0.00714573
ARL8A	1.00021	1.00006	1.00036	0.00721603
MRPL45	1.00017	1.00005	1.0003	0.00722053
ARHGAP26	0.99982	0.999688	0.999951	0.00724714
CEP112	1.00073	1.0002	1.00126	0.00726208
TNFRSF13C	0.998902	0.998101	0.999704	0.00727137
WDR37	0.999564	0.999246	0.999882	0.007272
TINAGL1	1.00003	1.00001	1.00005	0.00727362
OSTC	1.00006	1.00002	1.0001	0.00728502
CAPN10	0.999323	0.998829	0.999818	0.00732342
IGF2BP2	1.00005	1.00001	1.0001	0.00735049
KCNS2	1.00108	1.00029	1.00187	0.00735304
SEC31B	0.998436	0.997294	0.99958	0.00735841
ARL6IP1	1.00005	1.00001	1.00009	0.00738727
ECHDC2	0.999747	0.999562	0.999932	0.00738896
RBBP9	0.999647	0.999388	0.999905	0.00740166
AKAP12	1.0001	1.00003	1.00017	0.00742008
GOLGA8N	0.987454	0.978368	0.996624	0.0074268
SPOCK2	0.99989	0.99981	0.999971	0.00743465
CCND1	1.00001	1	1.00001	0.00744949
CD19	0.998509	0.997418	0.999601	0.00745279
KPNA2	1.00004	1.00001	1.00007	0.00746055
ITGB7	0.999017	0.998297	0.999737	0.00746286
CXCL13	0.999864	0.999764	0.999964	0.00746954
OGFOD1	1.00017	1.00004	1.00029	0.00748331
TMBIM6	1.00001	1	1.00003	0.00750925
ZNF471	0.997554	0.995764	0.999347	0.00752772
TCFL5	1.00044	1.00012	1.00076	0.00753722
INSR	0.999815	0.999679	0.999951	0.00754242
GNAT1	1.00799	1.00212	1.01389	0.00754718
NISCH	0.999794	0.999643	0.999945	0.00757141
KPNA3	1.00014	1.00004	1.00024	0.00757552
PITPNB	1.0001	1.00003	1.00017	0.00759232
LCNL1	0.973224	0.954014	0.99282	0.00762241
LUC7L2	0.847391	0.750313	0.95703	0.0076425
UBE2A	1.00012	1.00003	1.0002	0.00764347
TCEAL3	1.00039	1.0001	1.00068	0.00765182
BTBD10	1.00021	1.00006	1.00036	0.00765402
MLX	1.00025	1.00007	1.00043	0.00765887
NEURL4	0.99942	0.998993	0.999846	0.0076713
ZNF445	0.999369	0.998904	0.999833	0.00771175
ZNF324	0.999041	0.998337	0.999747	0.00772581
NFE2L1	1.00001	1	1.00002	0.00774956
PGBD2	0.998417	0.997254	0.999582	0.00776252
EID1	1.00008	1.00002	1.00014	0.00776629
CCDC169	1.0033	1.00087	1.00574	0.00777045
DOCK2	0.999753	0.99957	0.999935	0.00781272
ADAT1	1.00043	1.00011	1.00075	0.00782237
TSSK6	0.99483	0.991038	0.998638	0.00782573
TPSAB1	0.999571	0.999254	0.999887	0.00782956
WIPF1	0.999889	0.999807	0.999971	0.00783826
FAM216A	1.00086	1.00023	1.00149	0.0078433
DCST2	0.996831	0.994502	0.999166	0.00784345
ZNF879	0.997382	0.995456	0.999311	0.00784889
RP11-248J23.6	0.905853	0.842134	0.974393	0.00788341
GOLGA5	1.00018	1.00005	1.0003	0.00789849
WDR90	0.999695	0.999471	0.99992	0.00791961
ADORA2A	0.979547	0.964714	0.994608	0.00794283
ASCC1	1.00038	1.0001	1.00065	0.00796825
TMEM110-MUSTN1	0.980942	0.967094	0.994988	0.00798821
COL25A1	1.00489	1.00127	1.00852	0.00799372
EMR1	1.00061	1.00016	1.00106	0.00799384
IP6K1	0.999722	0.999517	0.999927	0.00800027
PCBD1	1.00015	1.00004	1.00025	0.00801397
TRMT61B	1.00097	1.00025	1.00168	0.00803366
PIGS	1.00013	1.00003	1.00022	0.00810619
DCTD	1.00012	1.00003	1.00021	0.00811158
SLC16A3	1.00004	1.00001	1.00007	0.00811179
XPR1	1.00006	1.00002	1.0001	0.00813505
CASP2	0.999807	0.999664	0.99995	0.00814011
PCBP2	1.00005	1.00001	1.00009	0.00815701
KRTAP20-4	1.02366	1.00608	1.04156	0.0081573
PLCXD1	0.999823	0.999692	0.999954	0.00819108
ZZEF1	0.999829	0.999703	0.999956	0.00819271
C2orf76	1.0007	1.00018	1.00123	0.00823025
PDCD1	0.998857	0.99801	0.999705	0.00824856
B4GALT3	1.00018	1.00005	1.00031	0.00825464
C11orf85	0.990228	0.983038	0.99747	0.00826058
MCFD2	1.00009	1.00002	1.00016	0.00826334
SETD3	1.00016	1.00004	1.00028	0.00829034
CDC42EP3	1.00011	1.00003	1.00019	0.00831872
DDX52	1.00021	1.00005	1.00036	0.00831916
ARAP2	0.999877	0.999785	0.999968	0.00832204
ZNF697	1.00059	1.00015	1.00104	0.00833918
EVL	0.999852	0.999743	0.999962	0.00834275
SELPLG	0.999763	0.999587	0.999939	0.00835797
FAH	1.0002	1.00005	1.00035	0.00836145
OTOGL	1.00407	1.00104	1.00711	0.00836927
GPR137C	0.996163	0.99332	0.999014	0.00837791
AREG	1.00003	1.00001	1.00005	0.00837828
ICAM3	0.998385	0.997185	0.999585	0.00838891
UBE2E3	1.00015	1.00004	1.00027	0.00840029
PRTN3	1.01543	1.00393	1.02706	0.00840305
P2RY14	0.995909	0.992877	0.99895	0.00840686
C2CD4D	0.993661	0.98897	0.998375	0.00844542
SLC13A2	0.993033	0.987879	0.998213	0.00845084
KLK9	1.00008	1.00002	1.00014	0.00845422
NDUFB5	1.00006	1.00002	1.00011	0.00847139
PEX19	1.00024	1.00006	1.00042	0.00848436
TAC1	1.02631	1.00665	1.04636	0.00850593
RP11-290H9.2	2.01459	1.19565	3.39445	0.00850754
STK24	1.00006	1.00001	1.0001	0.00851138
JAKMIP1	0.996894	0.994587	0.999207	0.00852251
MARVELD3	1.00037	1.00009	1.00065	0.00856307
ANAPC4	0.999498	0.999123	0.999872	0.00858897
F2RL1	1.00009	1.00002	1.00016	0.0085909
PNPLA6	0.999838	0.999717	0.999959	0.00862421
BRIP1	0.999517	0.999157	0.999877	0.00862877
HAX1	1.00015	1.00004	1.00025	0.00864414
WDTC1	0.999883	0.999796	0.99997	0.0086514
EZR	1.00001	1	1.00002	0.00870512
COQ10B	1.00026	1.00007	1.00046	0.00870848
TSEN15	1.00023	1.00006	1.00041	0.00871415
FKBP14	1.00017	1.00004	1.0003	0.00872595
TIA1	0.99979	0.999634	0.999947	0.00874599
EXO5	0.998767	0.997846	0.999689	0.00874607
LRRC56	0.998842	0.997978	0.999708	0.00876017
ERCC6	1.00044	1.00011	1.00077	0.00879048
ARID4A	0.999373	0.998904	0.999842	0.00882476
PNPLA4	1.00034	1.00009	1.0006	0.00882946
SELL	0.999702	0.999479	0.999925	0.00882967
ATP9B	0.999446	0.999031	0.999861	0.00883517
NEK6	1.00019	1.00005	1.00034	0.00883905
SRPX	1.0001	1.00003	1.00018	0.00886297
SF3B3	1.00005	1.00001	1.00008	0.00887316
RBP5	0.997649	0.995891	0.99941	0.00889287
C6orf211	1.0005	1.00013	1.00088	0.00893978
CCDC88B	0.999833	0.999707	0.999958	0.00895654
PPIL1	1.00013	1.00003	1.00023	0.00897464
C1GALT1C1	1.00046	1.00011	1.0008	0.00897843
SLC20A1	1.00007	1.00002	1.00013	0.00902699
ZNF619	0.997597	0.995797	0.9994	0.00903361
SLC5A12	1.0011	1.00027	1.00193	0.00905049
DNM2	0.999918	0.999857	0.99998	0.00905545
SLC39A1	1.00007	1.00002	1.00012	0.00907174
KIAA1467	1.00029	1.00007	1.0005	0.00907476
MYEOV	1.00007	1.00002	1.00013	0.00908828
DOCK8	0.9998	0.999649	0.99995	0.00910461
SLC25A29	0.999705	0.999483	0.999927	0.00914791
GRB14	1.00094	1.00023	1.00165	0.00917076
CNR2	0.991241	0.984702	0.997823	0.00917904
ARHGAP33	0.999202	0.998602	0.999802	0.00918738
UNK	0.999597	0.999294	0.9999	0.00919668
NOX3	1.02714	1.00664	1.04806	0.0092314
GNGT1	1.0016	1.0004	1.00281	0.00924011
RASL11A	1.00036	1.00009	1.00064	0.00925878
SFI1	0.999527	0.999171	0.999883	0.00926361
EVPLL	0.996068	0.993116	0.999029	0.00928294
GLYCTK	0.997941	0.996393	0.999492	0.00928716
GEN1	0.999608	0.999312	0.999903	0.00928791
SH3BP5	0.999257	0.998698	0.999817	0.00929215
C21orf58	0.999078	0.998383	0.999773	0.00930505
RPE	1.00028	1.00007	1.00049	0.00932389
ZNF566	0.998215	0.996872	0.99956	0.00933166
C16orf96	0.974442	0.955598	0.993658	0.00936119
GH1	0.849744	0.751542	0.960778	0.00936195
MAST3	0.999391	0.998932	0.99985	0.00936777
ZNF212	0.999447	0.999029	0.999864	0.00939885
MPLKIP	1.00026	1.00006	1.00046	0.00940149
IER3	1.00002	1.00001	1.00004	0.00940389
KLRD1	0.998825	0.997938	0.999712	0.00944174
MTMR6	1.0003	1.00007	1.00054	0.00944321
FAM120C	0.999469	0.999068	0.99987	0.00945347
GPRIN3	0.999509	0.999139	0.99988	0.00945547
MRPL33	1.00024	1.00006	1.00042	0.00946025
KARS	1.00005	1.00001	1.00008	0.00950185
DCST1	0.991201	0.984603	0.997844	0.00950231
VWA8	1.00029	1.00007	1.00052	0.00950554
SSR3	1.00004	1.00001	1.00006	0.0095064
STAT5A	0.999816	0.999677	0.999955	0.00953955
ZNF441	0.997273	0.995215	0.999335	0.00955328
TPP1	1.00005	1.00001	1.00008	0.00955395
C17orf62	0.999811	0.999668	0.999954	0.00956985
AMICA1	0.999589	0.999278	0.9999	0.00957051
ALB	1.00036	1.00009	1.00063	0.00958119
IGJ	0.999976	0.999959	0.999994	0.00959221
AKR1C4	1.00254	1.00062	1.00447	0.00960485
GPR113	0.989975	0.982454	0.997553	0.00960817
TNRC6C	0.999473	0.999074	0.999872	0.00961628
GHITM	1.00005	1.00001	1.00008	0.00962084
ZNF80	0.978961	0.963328	0.994848	0.00963152
HENMT1	0.999504	0.999129	0.99988	0.00963323
SYNJ1	0.999272	0.998721	0.999823	0.00964147
PPP1R18	1.00005	1.00001	1.00008	0.00965219
NCF1	0.998783	0.997862	0.999705	0.00966317
SCGB1C1	0.577008	0.380441	0.875138	0.00966594
MEF2B	0.989402	0.98145	0.997419	0.00966595
CCDC110	1.00556	1.00134	1.00979	0.00967199
ZFR2	0.999055	0.99834	0.999771	0.0096737
MOBP	1.00313	1.00076	1.0055	0.00968336
SIGLEC6	0.989716	0.981994	0.997498	0.00968604
RNF128	1.00011	1.00003	1.0002	0.00971
PDIA3	1.00002	1	1.00003	0.00973693
ANKRD18A	1.00226	1.00054	1.00397	0.00975737
YTHDC2	0.999719	0.999505	0.999932	0.00977222
RP11-546B8.6	0.9516	0.91645	0.988099	0.0097821
GALM	0.999395	0.998937	0.999854	0.00978487
ZNF500	0.998923	0.998106	0.99974	0.00979386
IST1	1.00011	1.00003	1.00019	0.00980566
HP1BP3	0.999925	0.999868	0.999982	0.00981096
SPERT	1.0032	1.00077	1.00563	0.00983654
CT45A3	1.0542	1.01279	1.09731	0.00984282
MAP3K14	0.999736	0.999536	0.999936	0.0098502
DKK1	1.00007	1.00002	1.00012	0.00989495
NQO1	1.00002	1	1.00003	0.00991791
ZNF799	0.996163	0.993257	0.999079	0.00992832
C9orf172	0.998855	0.997985	0.999726	0.00995078
CHRNA9	1.00032	1.00008	1.00057	0.00997454
PAFAH1B2	1.00008	1.00002	1.00013	0.00998295
CGNL1	0.999567	0.999238	0.999896	0.00998681
PTGES3	1.00003	1.00001	1.00006	0.00999344
DOC2B	0.999919	0.999858	0.999981	0.00999791
CYB5RL	0.997308	0.995264	0.999356	0.00999848
OR51I1	1.02239	1.00531	1.03977	0.0100114
ZNF473	0.99924	0.998662	0.999818	0.0100154
BZW2	1.00006	1.00001	1.00011	0.0100213
ZDHHC16	1.0003	1.00007	1.00052	0.0100255
GYLTL1B	1.00005	1.00001	1.00009	0.0100378
GALNT2	1.00003	1.00001	1.00006	0.0100478
TEN1-CDK3	0.994485	0.990304	0.998684	0.0100971
DYNC2LI1	1.00079	1.00019	1.00139	0.0101071
CYP4X1	0.999729	0.999523	0.999936	0.0101074
GZMK	0.999016	0.998266	0.999766	0.0101302
KPNA4	1.00005	1.00001	1.00009	0.0101339
CAAP1	1.00049	1.00012	1.00086	0.0101366
BOC	0.99967	0.999418	0.999922	0.0101544
MMGT1	1.0002	1.00005	1.00035	0.0101547
HS6ST3	1.00325	1.00077	1.00574	0.010194
TESK2	0.999331	0.998821	0.999842	0.0102343
HES5	0.997108	0.994906	0.999316	0.0102759
LRRC52	1.06699	1.01542	1.12118	0.0103107
KIR3DL1	0.962697	0.935105	0.991102	0.0103967
MS4A2	0.996857	0.994459	0.99926	0.0104064
RPS6KA5	0.999479	0.99908	0.999878	0.0104071
SEPSECS	0.99891	0.998077	0.999744	0.0104202
DGKG	1.0004	1.00009	1.00071	0.0104232
VDAC1	1.00004	1.00001	1.00007	0.0104413
ANKRD29	0.999711	0.99949	0.999932	0.0104477
ADCY4	0.998825	0.997926	0.999724	0.0104584
TAOK2	0.999773	0.999599	0.999947	0.0104696
DNMT1	0.999936	0.999886	0.999985	0.0104768
AGO4	0.999535	0.999179	0.999891	0.0105303
CTB-133G6.1	0.984074	0.972041	0.996256	0.0105413
TSPAN31	1.00026	1.00006	1.00045	0.0105477
STK11	0.999867	0.999765	0.999969	0.0105618
SNAPC1	1.00019	1.00004	1.00034	0.0105643
DEFA3	1.01865	1.00432	1.03319	0.010588
VSTM4	0.999762	0.99958	0.999945	0.010659
SFRP5	1.00074	1.00017	1.00131	0.0106911
BCL2L11	0.999773	0.999599	0.999947	0.0107073
ECD	1.00041	1.00009	1.00072	0.0107121
POLH	0.999449	0.999025	0.999872	0.0107139
USP6NL	0.999786	0.999621	0.99995	0.0107219
KLRF1	0.987397	0.977824	0.997064	0.0107241
VWA9	1.0003	1.00007	1.00053	0.0107483
ABHD13	1.00032	1.00007	1.00056	0.0107495
LIF	1.00015	1.00004	1.00027	0.0107562
JKAMP	1.0002	1.00005	1.00035	0.010772
AC006486.9	1.20325	1.0437	1.38718	0.010792
GDI1	1.00006	1.00001	1.0001	0.0108017
IWS1	1.00021	1.00005	1.00037	0.0108044
ITM2A	0.999487	0.999093	0.999882	0.0108148
GNMT	0.985233	0.974023	0.996572	0.0108318
CCDC130	0.999576	0.999251	0.999902	0.0108359
BAG2	1.00035	1.00008	1.00061	0.0108364
RP11-277P12.6	0.707559	0.542195	0.923359	0.0108636
GEMIN2	1.00051	1.00012	1.0009	0.010878
HCRTR1	0.949105	0.911688	0.988057	0.0109133
C11orf42	0.944772	0.904333	0.987019	0.0109162
ZBTB40	0.999605	0.999302	0.999909	0.010917
CHCHD2	1.00001	1	1.00002	0.0109497
C3orf70	0.999275	0.998717	0.999834	0.0109609
IFT57	1.00019	1.00004	1.00034	0.0109626
LTB	0.99966	0.999398	0.999922	0.0109972
LELP1	0.908506	0.843736	0.978248	0.0109985
ERBB3	0.999925	0.999868	0.999983	0.0110013
KIF24	0.999383	0.998907	0.999859	0.0110089
TMEM230	1.0001	1.00002	1.00018	0.0110128
VMAC	0.997771	0.996056	0.999489	0.0110157
ACAD11	0.987933	0.978728	0.997224	0.0110175
TRIM73	0.983923	0.971701	0.9963	0.0110464
IKZF4	0.998766	0.997814	0.999718	0.0110855
ACAT1	1.00021	1.00005	1.00037	0.0111065
ZNF426	0.999747	0.999552	0.999942	0.0111113
PSEN1	1.00011	1.00003	1.0002	0.011173
IL2	0.890293	0.813848	0.973918	0.0111827
ZNF317	0.999623	0.999332	0.999914	0.0111987
INSC	1.00365	1.00083	1.00647	0.0112051
UBN2	0.999582	0.999259	0.999905	0.011237
C2CD5	0.999729	0.999519	0.999939	0.011297
AMPD3	0.999813	0.999668	0.999958	0.011327
ARSI	1.00007	1.00002	1.00013	0.0113278
DPYSL2	0.999884	0.999794	0.999974	0.0113546
PPFIA3	0.999771	0.999594	0.999948	0.0114436
LIG1	0.999864	0.999758	0.999969	0.011445
TTC7B	1.00025	1.00006	1.00044	0.0114479
RTP5	0.968767	0.945226	0.992894	0.0114675
CARD8	0.999416	0.998964	0.999869	0.0114741
PPM1M	0.999484	0.999084	0.999884	0.0115125
NGRN	1.0002	1.00004	1.00035	0.0115437
PTCRA	0.984572	0.972762	0.996526	0.011562
LMF1	0.999401	0.998936	0.999866	0.0115663
HSPD1	1.00002	1	1.00003	0.011569
ARHGAP19-SLIT1	1.04717	1.01036	1.08531	0.0115806
CERS2	1.00008	1.00002	1.00014	0.0115926
MAPK11	0.999701	0.999468	0.999933	0.0115937
PRAMEF5	1.03617	1.00797	1.06517	0.0116207
CALML5	0.999985	0.999973	0.999997	0.0116338
FNBP1	0.999828	0.999695	0.999962	0.0116355
UGGT1	1.00009	1.00002	1.00016	0.0116478
SUMO1	1.00009	1.00002	1.00017	0.0117075
ZNF324B	0.998113	0.996648	0.99958	0.0117405
SLC38A6	1.00075	1.00017	1.00133	0.011754
RASSF1	0.999667	0.999407	0.999926	0.0117713
SLC41A1	1.00022	1.00005	1.00038	0.0117801
MNAT1	1.00029	1.00006	1.00051	0.0117807
DDX50	1.00032	1.00007	1.00057	0.0117907
SLMO2	1.00009	1.00002	1.00017	0.0118263
SH2D4A	0.99974	0.999537	0.999942	0.0118417
TTPAL	1.00011	1.00002	1.0002	0.0118772
MS4A1	0.99944	0.999004	0.999876	0.0118774
CROCC	0.999856	0.999743	0.999968	0.011901
CCNE2	0.999179	0.998539	0.999819	0.0119071
FOXD4L1	0.96213	0.933613	0.991518	0.0119094
XCL2	0.990538	0.983223	0.997906	0.0119314
IL21	0.925548	0.87135	0.983117	0.0119705
PLSCR4	0.999671	0.999415	0.999928	0.0119973
PIGB	1.00122	1.00027	1.00217	0.0119994
CBX5	0.999949	0.999909	0.999989	0.012023
TIFA	0.999559	0.999215	0.999903	0.0120238
CELF3	1.00313	1.00069	1.00557	0.0120292
ARHGEF3	0.999793	0.999631	0.999954	0.0120405
IPO7	1.00004	1.00001	1.00008	0.0120438
SHMT1	0.999811	0.999663	0.999958	0.0120534
RAD9B	0.995263	0.99158	0.998959	0.0120626
MAG	1.00962	1.0021	1.0172	0.0120724
CCDC159	0.998955	0.99814	0.999771	0.0120752
EBLN2	0.986444	0.975983	0.997017	0.0121051
IRF4	0.999586	0.999262	0.999909	0.012123
ART4	0.978949	0.962807	0.995362	0.012143
SPANXN3	1.0146	1.00317	1.02617	0.0121834
RAF1	0.999851	0.999735	0.999968	0.0122274
SLA	0.999714	0.999491	0.999938	0.0122404
CCDC149	0.999416	0.99896	0.999873	0.0122478
MYCN	0.998538	0.997395	0.999682	0.0122571
COX11	1.00044	1.0001	1.00079	0.0122671
CD79A	0.999845	0.999723	0.999966	0.012311
SLA2	0.99905	0.998306	0.999794	0.0123335
OR10G2	0.734811	0.577226	0.935417	0.0123471
CGB2	1.02083	1.00448	1.03746	0.012354
CTSW	0.999478	0.99907	0.999887	0.0123869
TMSB4Y	0.996796	0.994291	0.999307	0.0124031
RSPO1	0.993815	0.988994	0.99866	0.0124057
BTK	0.999173	0.998524	0.999822	0.0124537
PTPRU	1.00009	1.00002	1.00017	0.0124551
RSL1D1	1.00005	1.00001	1.00009	0.0124865
CYTH3	1.00018	1.00004	1.00032	0.0124955
GTF2A2	1.00018	1.00004	1.00032	0.0125049
AHSG	1.00398	1.00086	1.00712	0.012505
CCT4	1.00003	1.00001	1.00005	0.012524
SPN	0.999696	0.999457	0.999935	0.0125352
FAM169A	1.00111	1.00024	1.00198	0.0125366
PIP5K1B	1.00037	1.00008	1.00066	0.0125371
BCAR3	1.00008	1.00002	1.00014	0.0125498
MEI1	0.999696	0.999457	0.999935	0.0125569
ANKRD55	0.976731	0.958829	0.994968	0.0126136
TMEM194B	1.00025	1.00005	1.00044	0.0126331
SLC18B1	0.999568	0.999229	0.999908	0.0127088
SPAG11B	1.01843	1.0039	1.03316	0.0127196
ZNF740	0.999673	0.999416	0.99993	0.0127338
RFX1	0.999331	0.998804	0.999857	0.0127427
MOAP1	1.00048	1.0001	1.00086	0.012784
CD79B	0.999278	0.99871	0.999846	0.0127849
PCGF3	0.999816	0.999672	0.999961	0.0127896
GLTPD2	0.994205	0.989666	0.998765	0.0127939
MUM1L1	1.00092	1.0002	1.00165	0.0128026
TIMM23B	1.00151	1.00032	1.0027	0.0128083
FAM65A	1.00011	1.00002	1.00019	0.0128258
TCP11	0.998687	0.997654	0.999721	0.0128272
CDKN2AIPNL	1.00024	1.00005	1.00044	0.0128598
SPPL2B	0.999757	0.999565	0.999948	0.0128699
PAPOLA	1.00005	1.00001	1.0001	0.0128787
CLEC1A	1.0002	1.00004	1.00037	0.0128917
MAGIX	0.99804	0.996498	0.999585	0.0129014
AGA	1.00028	1.00006	1.00049	0.0129317
2021-09-10	1.00008	1.00002	1.00015	0.0129425
KLHL6	0.99956	0.999213	0.999907	0.0129631
AARS	1.00004	1.00001	1.00008	0.0130015
DKK3	1.00003	1.00001	1.00005	0.0130089
TJP3	0.999711	0.999482	0.999939	0.0130406
FCRL6	0.994007	0.989301	0.998736	0.0130543
ASNSD1	1.00015	1.00003	1.00027	0.0130612
KL	0.996405	0.993575	0.999243	0.0130614
CTTN	1	1	1.00001	0.0130874
MRPL50	1.00032	1.00007	1.00058	0.0130939
LCE3A	0.999791	0.999626	0.999956	0.0131028
BBS1	0.994546	0.990256	0.998855	0.0131579
ZSWIM3	0.997791	0.996048	0.999537	0.0131581
ABCB8	0.999783	0.999612	0.999955	0.0131911
KIF7	1.0005	1.0001	1.00089	0.0132106
SLC25A23	0.999891	0.999805	0.999977	0.0132244
TBX21	0.997168	0.994932	0.999408	0.0132607
TXNRD1	1.00001	1	1.00003	0.0132669
SAMD8	1.00019	1.00004	1.00034	0.0132899
PBX4	0.997632	0.995761	0.999506	0.0132944
GUCY1B3	0.999624	0.999327	0.999922	0.0133107
BNIP3	1.00005	1.00001	1.00009	0.0133687
RFK	1.00034	1.00007	1.00061	0.0133911
MME	1.00002	1	1.00004	0.0134399
LRRC16B	0.998687	0.997647	0.999728	0.0134471
EGFR	1	1	1.00001	0.0134751
ASPH	1.00002	1	1.00004	0.013491
CMC2	1.00026	1.00005	1.00046	0.0135427
EPRS	1.00006	1.00001	1.00011	0.0135613
NCBP2	1.00008	1.00002	1.00014	0.0135961
ZDHHC7	1.00016	1.00003	1.00028	0.0136159
PLD4	0.998895	0.998017	0.999773	0.0136203
SHCBP1	1.00025	1.00005	1.00044	0.0136536
C11orf21	0.995229	0.991454	0.999019	0.0136569
LY6G5B	0.995959	0.992759	0.999169	0.0136614
RTTN	1.00018	1.00004	1.00033	0.0136739
FUBP3	1.00017	1.00003	1.0003	0.013683
NIFK	1.00012	1.00002	1.00021	0.0136844
DIP2A	0.999719	0.999496	0.999943	0.0137258
MOXD1	0.999901	0.999821	0.99998	0.0137284
TMEM262	0.9919	0.985504	0.998337	0.0137361
LPXN	0.999726	0.999509	0.999944	0.0137411
CMSS1	1.00017	1.00003	1.0003	0.0137581
KTN1	1.00002	1	1.00003	0.0137593
OR6C74	2.71105	1.22611	5.99438	0.0137594
INTS10	0.999824	0.999683	0.999964	0.0137962
CBLN3	0.997862	0.996163	0.999564	0.0138097
TBCE	1.00031	1.00006	1.00056	0.0138257
UAP1	1.00012	1.00002	1.00021	0.0138621
NKRF	1.0005	1.0001	1.0009	0.0138791
USP19	0.999769	0.999586	0.999953	0.0138837
TRIM66	0.999198	0.99856	0.999837	0.013887
MAGEF1	1.0001	1.00002	1.00017	0.0138928
NKAP	1.00044	1.00009	1.0008	0.0139422
MTX2	1.00019	1.00004	1.00034	0.0139609
ALG2	1.0002	1.00004	1.00035	0.0139615
ILF3	0.99995	0.99991	0.99999	0.0139835
VILL	0.999351	0.998833	0.999868	0.0139836
SPATA13	0.999548	0.999188	0.999909	0.0140012
TSHZ1	0.999709	0.999477	0.999941	0.0140088
CFDP1	1.00008	1.00002	1.00015	0.0140221
PSMC2	1.00006	1.00001	1.00011	0.0140243
ODF3B	0.999765	0.999577	0.999952	0.014056
TMEM236	1.00627	1.00126	1.01131	0.0140602
FAM153C	0.974096	0.953903	0.994716	0.0140628
GYPC	0.999575	0.999236	0.999914	0.0140878
TSPAN19	1.00436	1.00088	1.00786	0.0140916
MAP3K5	0.999842	0.999716	0.999968	0.0141004
ZSCAN30	0.999174	0.998515	0.999834	0.0141122
SERPINA5	1.0006	1.00012	1.00108	0.0141394
CDH23	0.999472	0.99905	0.999894	0.0141622
POLE	0.999851	0.999732	0.99997	0.0141671
GHRL	0.987942	0.978411	0.997566	0.014178
DOK3	0.99935	0.99883	0.999869	0.0141828
ITSN2	0.999871	0.999768	0.999974	0.0142178
SNX20	0.999444	0.999	0.999889	0.0142247
AQP1	0.999927	0.999868	0.999985	0.0143248
N4BP3	0.999619	0.999314	0.999924	0.0143574
HGSNAT	0.999914	0.999844	0.999983	0.014414
LPIN2	0.999803	0.999644	0.999961	0.0144872
APPL1	0.999804	0.999647	0.999961	0.0144935
LAPTM4B	1.00003	1.00001	1.00005	0.014505
TTC9C	1.00064	1.00013	1.00115	0.014506
GNA12	1.00006	1.00001	1.00011	0.0145228
USHBP1	0.994708	0.990483	0.998951	0.0145657
ANAPC15	1.00026	1.00005	1.00047	0.0145663
CGB1	1.28961	1.05155	1.58157	0.0145777
UBXN11	0.999633	0.999338	0.999927	0.0145983
LONP2	1.00014	1.00003	1.00025	0.0146273
FAM132B	1.00092	1.00018	1.00167	0.0146749
EQTN	1.04454	1.00861	1.08175	0.0146828
TES	1.00006	1.00001	1.00011	0.014684
RPA2	0.99985	0.99973	0.999971	0.0147007
ERRFI1	1.00004	1.00001	1.00007	0.0147093
HOOK1	0.999841	0.999713	0.999969	0.014729
CTD-2006C1.13	0.917042	0.855385	0.983143	0.0147395
TRABD2A	1.00052	1.0001	1.00094	0.0147514
C8orf33	1.00014	1.00003	1.00026	0.0147692
GRIN2C	0.997808	0.996049	0.999571	0.0148293
KIF27	0.997695	0.995845	0.999549	0.0148428
SCAI	0.999022	0.998235	0.999809	0.0148548
APOA2	1.00173	1.00034	1.00313	0.0149226
CTD-2192J16.20	0.991211	0.984187	0.998285	0.014973
ZNF783	0.999436	0.998982	0.99989	0.0149764
ZNF366	0.997606	0.995682	0.999535	0.0149989
RASSF2	0.999767	0.999579	0.999955	0.0150067
ENTPD1	0.999818	0.999672	0.999965	0.0150069
BMF	0.999656	0.999379	0.999933	0.0150069
TNPO1	1.00008	1.00002	1.00015	0.0150577
ZNF639	1.00014	1.00003	1.00025	0.0151394
CSGALNACT1	0.999656	0.999378	0.999934	0.015143
COLGALT1	1.00004	1.00001	1.00008	0.0151729
YWHAB	1.00002	1	1.00004	0.0151951
JMY	0.999737	0.999526	0.999949	0.0151997
BCAP31	1.00001	1	1.00002	0.0152015
UPRT	1.00087	1.00017	1.00157	0.0152153
AP2B1	1.00004	1.00001	1.00006	0.0152315
CYP4A11	0.940808	0.895564	0.988338	0.0152478
LIMD1	0.999629	0.999329	0.999929	0.0152756
ASAH2B	1.00271	1.00052	1.0049	0.0152913
PTPRS	0.999937	0.999887	0.999988	0.0152968
FUNDC2	1.00014	1.00003	1.00025	0.0152973
RFXAP	1.00179	1.00034	1.00325	0.0153045
GPR87	1.00008	1.00001	1.00014	0.0153196
MAP1LC3A	0.999638	0.999345	0.999931	0.0153335
SEMA4D	0.99986	0.999746	0.999973	0.0153386
SENP2	1.00011	1.00002	1.00021	0.0153518
TMEM9	1.00007	1.00001	1.00012	0.0154196
CDC42EP4	0.999962	0.999931	0.999993	0.0154533
RREB1	0.999919	0.999854	0.999985	0.015469
ANGPTL6	0.986228	0.975217	0.997363	0.015482
GRIN3A	0.993218	0.987761	0.998706	0.0154883
FAM109A	0.999511	0.999115	0.999907	0.0155254
ITGB6	1.00002	1	1.00003	0.0155768
CCDC59	1.00033	1.00006	1.0006	0.0156036
C16orf58	1.00031	1.00006	1.00055	0.0156132
GOLGA8K	0.899977	0.826281	0.980246	0.0156196
TPH1	0.982902	0.969245	0.996751	0.0156999
NPTN	1.00007	1.00001	1.00012	0.0157243
CD7	0.999726	0.999504	0.999948	0.015737
ANKRD28	0.999768	0.99958	0.999956	0.0157681
FUT2	0.999849	0.999726	0.999972	0.0157771
FAM47E	1.00792	1.00148	1.01439	0.0157864
RBSN	0.999594	0.999264	0.999924	0.015797
GPR144	0.996841	0.994282	0.999406	0.0158187
PRCD	0.993334	0.987952	0.998745	0.0158282
SLC25A51	1.00035	1.00007	1.00063	0.0159102
BIVM	1.00071	1.00013	1.00129	0.0159286
MASP2	0.989342	0.980759	0.997999	0.0159294
RNF165	0.999614	0.9993	0.999928	0.0159334
SFT2D1	1.00023	1.00004	1.00041	0.0159441
PREX1	0.999846	0.999721	0.999971	0.0159719
C16orf72	1.00009	1.00002	1.00016	0.0160098
FAM69A	1.00033	1.00006	1.00061	0.0160273
CCDC96	0.997382	0.995257	0.999512	0.016041
LAX1	0.998996	0.998179	0.999813	0.0160729
EIF2AK1	1.00006	1.00001	1.00011	0.0161046
SNX15	0.990832	0.983426	0.998293	0.0161102
SEMA5A	0.999873	0.999769	0.999976	0.0161378
RNF19A	0.999903	0.999823	0.999982	0.0161616
FUBP1	1.00013	1.00002	1.00023	0.0161913
B4GALNT1	1.0002	1.00004	1.00036	0.0162058
PCOLCE2	1.00037	1.00007	1.00067	0.0162333
TBC1D17	0.999771	0.999585	0.999958	0.0162414
D2HGDH	0.999623	0.999316	0.999931	0.0162763
CC2D1A	0.999857	0.999741	0.999974	0.0162782
IL34	0.999432	0.99897	0.999896	0.0163118
FAM71F2	0.99502	0.990975	0.999082	0.0163144
PNPLA5	1.01046	1.00192	1.01908	0.0163222
CYB561A3	0.999806	0.999648	0.999964	0.016392
BECN1	1.00022	1.00004	1.00041	0.0164156
PHKB	1.00014	1.00003	1.00026	0.0164401
RBM7	1.00041	1.00008	1.00075	0.0164615
HLF	0.999743	0.999533	0.999953	0.0164707
ABCA7	0.999771	0.999583	0.999958	0.0164716
TMEM170A	1.00062	1.00011	1.00113	0.0165065
CDC14B	0.999578	0.999233	0.999923	0.0165182
NPTX1	1.00009	1.00002	1.00016	0.0165184
NCALD	0.999733	0.999515	0.999951	0.0165223
H2BFM	1.02248	1.00406	1.04123	0.0165262
FMNL3	0.999833	0.999697	0.99997	0.0165655
PCF11	0.99974	0.999527	0.999953	0.0165981
SCG5	1.00044	1.00008	1.0008	0.0166093
PON3	1.00043	1.00008	1.00078	0.0166205
CSRP1	1.00004	1.00001	1.00007	0.016631
TMEM150C	0.999585	0.999246	0.999925	0.0166425
ACSL3	1.00009	1.00002	1.00017	0.0166456
MRPL30	1.00028	1.00005	1.00051	0.016682
BANK1	0.998872	0.997948	0.999796	0.0167047
FAM120AOS	1.00025	1.00004	1.00045	0.0167777
C1orf27	1.00039	1.00007	1.00072	0.0167927
ERP44	1.00008	1.00001	1.00014	0.0168177
QRICH2	0.99867	0.997581	0.99976	0.0168355
TLR2	1.00009	1.00002	1.00017	0.0168401
INHBA	1.00001	1	1.00003	0.0168465
PER3	0.99984	0.999709	0.999971	0.0168798
C4BPB	1.01604	1.00286	1.0294	0.016905
WDR41	1.00027	1.00005	1.00049	0.0169496
GUCA2A	1.09982	1.01719	1.18916	0.0169502
HSD17B12	1.00006	1.00001	1.0001	0.0169535
SUGP2	0.999714	0.999479	0.999949	0.0169666
UBE2Q1	1.00015	1.00003	1.00027	0.016969
ADAP2	0.99974	0.999527	0.999954	0.0170169
KDM8	0.997485	0.995423	0.99955	0.0170243
SUGT1	1.00013	1.00002	1.00024	0.0170359
MAP1LC3B	1.00011	1.00002	1.00021	0.0170639
GIMAP6	0.999625	0.999316	0.999933	0.0170805
HEATR9	0.966721	0.9402	0.993989	0.0170913
GABRA3	1.00051	1.00009	1.00093	0.0171271
CSNK1G2	0.999871	0.999765	0.999977	0.0171497
ANLN	1.00005	1.00001	1.00008	0.0171562
TAF6L	0.999259	0.998649	0.999868	0.0171682
MRPS18B	1.00008	1.00001	1.00015	0.017217
ATIC	1.00009	1.00002	1.00016	0.0172399
ZNF224	0.998526	0.997314	0.999739	0.0172424
FOXN1	0.999875	0.999772	0.999978	0.0172675
LRRC59	1.00004	1.00001	1.00007	0.0172714
HVCN1	0.999123	0.998401	0.999845	0.0172814
SRY	0.987171	0.976731	0.997722	0.0172956
TDRD5	1.00044	1.00008	1.0008	0.0173014
ZNF232	0.999016	0.998206	0.999826	0.0173411
ZNF41	0.999128	0.998409	0.999846	0.0173587
ZNF300	0.999135	0.998423	0.999848	0.0173968
ANP32A	1.00008	1.00001	1.00015	0.0174167
PKLR	0.989913	0.981675	0.99822	0.0174196
STK3	1.00021	1.00004	1.00038	0.017434
APBA3	0.999452	0.999001	0.999904	0.0174602
VDAC2	1.00007	1.00001	1.00013	0.0174858
ARF1	1.00002	1	1.00004	0.0175897
FIGN	1.00095	1.00017	1.00174	0.0176114
SSTR3	0.991642	0.98479	0.998542	0.0176754
CFI	1.00015	1.00003	1.00027	0.0177299
ZNF443	0.997218	0.994925	0.999517	0.0177361
ONECUT2	0.998256	0.996817	0.999698	0.0177437
FOXP3	0.999546	0.999172	0.999921	0.0177465
C16orf92	0.795519	0.65842	0.961166	0.0177702
CUBN	0.994064	0.989182	0.998971	0.0178009
ZNF540	0.992261	0.985905	0.998658	0.017814
ZNF337	0.996903	0.994347	0.999465	0.0178486
FOXRED2	0.999904	0.999824	0.999983	0.0179024
PHLDA1	1.00002	1	1.00004	0.0179261
SMC1B	0.999511	0.999106	0.999916	0.0179378
BMS1	1.00013	1.00002	1.00023	0.0179825
DEFB133	1.04519	1.00761	1.08418	0.0180009
POU3F1	0.999806	0.999646	0.999967	0.0180228
ZNF501	0.996656	0.993894	0.999427	0.0180287
ANO8	0.999427	0.998952	0.999902	0.0180396
HCG27	0.990939	0.983488	0.998446	0.0180812
GPR55	0.996002	0.992699	0.999316	0.018095
TRIM35	0.999745	0.999534	0.999956	0.0181146
LAMA3	1	1	1.00001	0.0181281
NOLC1	1.00005	1.00001	1.00009	0.0181442
DCUN1D1	1.00007	1.00001	1.00013	0.0181586
2021-09-07	1.00006	1.00001	1.00012	0.0181606
CST7	0.999481	0.99905	0.999912	0.0181615
NCOA5	0.999704	0.999459	0.99995	0.0181707
SCOC	1.00011	1.00002	1.00021	0.018173
DDOST	1.00004	1.00001	1.00008	0.0181736
LGALS1	1.00001	1	1.00001	0.0181888
PPIAL4D	1.22437	1.03503	1.44834	0.0181923
DOCK10	0.999713	0.999474	0.999951	0.0181928
AASDHPPT	1.00004	1.00001	1.00007	0.0182077
OSTM1	1.00015	1.00003	1.00028	0.0182098
SRPX2	1.00018	1.00003	1.00033	0.0182404
BCL2	0.999761	0.999562	0.999959	0.0182523
SYT7	1.00009	1.00001	1.00016	0.0182817
CTNS	0.999547	0.999171	0.999923	0.0182877
IL10RA	0.999811	0.999654	0.999968	0.0183347
CCT8	1.00005	1.00001	1.00009	0.0183986
SAR1A	1.00008	1.00001	1.00014	0.0183994
TRPS1	0.999866	0.999755	0.999977	0.0184353
SLC25A43	1.00017	1.00003	1.00032	0.0184829
IL20RA	0.999673	0.999401	0.999945	0.0184857
GZMB	0.999773	0.999584	0.999962	0.018531
HMMR	1.00023	1.00004	1.00041	0.0185364
GPR150	0.988925	0.979801	0.998135	0.0185425
MCUR1	0.999764	0.999567	0.99996	0.0185451
PROCA1	0.996234	0.99311	0.999368	0.0185525
MCCD1	0.650545	0.454793	0.930553	0.0185699
GRAMD4	0.999874	0.99977	0.999979	0.0185753
KCNIP2	0.994464	0.989878	0.999072	0.0186037
SOX30	0.998506	0.997264	0.99975	0.0186132
ALG3	1.00005	1.00001	1.0001	0.0186283
COL28A1	1.00048	1.00008	1.00088	0.0186494
BTC	1.0013	1.00022	1.00239	0.0186605
FEM1A	0.998248	0.99679	0.999708	0.0186658
FOXP4	0.999871	0.999763	0.999978	0.018685
NCOA2	0.999866	0.999754	0.999978	0.0186903
DGCR8	0.999699	0.999447	0.99995	0.0187359
CT45A1	1.00093	1.00015	1.00171	0.018793
PAICS	1.00004	1.00001	1.00008	0.0187965
IKZF2	0.999744	0.99953	0.999957	0.0187992
HBEGF	1.00004	1.00001	1.00007	0.0188074
SPIC	0.958315	0.924868	0.992971	0.0188164
CDK3	0.98891	0.97975	0.998155	0.0188282
FAM26D	1.07674	1.01229	1.14531	0.0188893
RP5-864K19.6	0.970465	0.946475	0.995063	0.0188998
LMO3	1.00047	1.00008	1.00086	0.0189022
PHIP	0.999857	0.999737	0.999976	0.0189191
PRKRA	1.00016	1.00003	1.0003	0.018922
ZBED3	0.999266	0.998654	0.999879	0.0189308
TICAM2	0.979388	0.962496	0.996577	0.0189619
TAS2R4	0.978187	0.960327	0.996379	0.0189882
DRP2	1.0019	1.00031	1.0035	0.0190345
EYA1	1.00063	1.0001	1.00116	0.0190479
EML6	0.999008	0.99818	0.999837	0.0190653
CTCFL	1.00022	1.00004	1.0004	0.0190768
GKN2	1.02753	1.00446	1.05114	0.0190857
NOMO2	1.00043	1.00007	1.00078	0.0191118
RSPO4	1.00058	1.00009	1.00106	0.0191221
CHFR	0.999763	0.999564	0.999961	0.0191221
TSPAN11	0.999744	0.99953	0.999958	0.0191516
SCYL3	0.999217	0.998561	0.999872	0.0191797
PON2	1.00005	1.00001	1.00009	0.019209
CCDC180	0.988362	0.97872	0.9981	0.0192743
KIAA1407	0.998955	0.998081	0.99983	0.0193185
DYNC1I2	1.00009	1.00001	1.00017	0.0193459
FAM86C1	1.00027	1.00004	1.0005	0.0193701
EVA1C	0.999772	0.99958	0.999963	0.0193977
C20orf202	0.97709	0.958288	0.996261	0.0193978
PIK3CG	0.999255	0.998632	0.99988	0.0193987
ZNF141	0.998203	0.996699	0.99971	0.0194175
FAM73B	0.999647	0.999351	0.999943	0.0194219
HEXB	1.0001	1.00002	1.00018	0.0194242
SLC35D2	1.00039	1.00006	1.00073	0.0194338
WFIKKN1	0.995823	0.992332	0.999326	0.0194611
CTLA4	0.999095	0.998336	0.999854	0.0194659
YIPF4	1.00023	1.00004	1.00042	0.0194708
KLHL38	1.00113	1.00018	1.00208	0.0195048
RAMP2	0.999249	0.998618	0.999879	0.0195223
KLK4	1.00143	1.00023	1.00264	0.0195305
ACN9	1.00033	1.00005	1.00061	0.0195797
GPR31	0.967124	0.940354	0.994657	0.0195927
RDH11	1.00007	1.00001	1.00012	0.0196063
DCAF13	1.00011	1.00002	1.0002	0.0196102
MSC	1.00012	1.00002	1.00021	0.0196299
TMEM175	0.999451	0.998991	0.999912	0.0196355
ACTL6A	1.00006	1.00001	1.00011	0.0196479
FAM107B	0.999842	0.999709	0.999975	0.0196488
MPND	0.999607	0.999276	0.999937	0.0196648
CHDH	0.999187	0.998505	0.99987	0.0196653
SQLE	1.00003	1	1.00005	0.0196734
GPRASP1	0.997702	0.995775	0.999633	0.0196765
IRGQ	0.99971	0.999466	0.999954	0.0196825
ARHGAP11B	0.999201	0.99853	0.999873	0.0197703
FAM209A	0.940212	0.89271	0.990242	0.0197704
ME1	1.00002	1	1.00004	0.0198021
FCN2	0.889137	0.80543	0.981544	0.0198465
ZNF575	0.996073	0.99278	0.999377	0.019876
RAB3GAP1	1.00013	1.00002	1.00023	0.019898
AC231657.1	0.76801	0.614984	0.959113	0.0199021
HCN3	0.998691	0.99759	0.999793	0.0199148
COG6	1.00037	1.00006	1.00069	0.0199156
PTPLA	1.00089	1.00014	1.00163	0.0199268
CPAMD8	0.998794	0.997779	0.999809	0.0199327
CABLES1	0.999553	0.999177	0.999929	0.0199602
CHAF1A	0.99985	0.999723	0.999976	0.0199648
AP000275.65	1.0306	1.00477	1.05709	0.0199651
TAAR8	1.24701	1.03543	1.50181	0.0199664
SLC30A8	1.00114	1.00018	1.0021	0.0199686
ZFP28	0.998662	0.997535	0.999789	0.0199813
TMEM215	1.01762	1.00276	1.03271	0.01999
PRDM2	0.999827	0.999682	0.999973	0.0199985
TMEM159	1.00008	1.00001	1.00015	0.0200304
ZNF333	0.998614	0.997448	0.999782	0.020052
SPHK2	0.999207	0.998539	0.999875	0.0200554
LRP11	1.00008	1.00001	1.00016	0.0201095
ABCF1	1.00004	1.00001	1.00008	0.0201253
COX20	1.00129	1.0002	1.00237	0.0201405
CTD-2105E13.6	0.987322	0.976751	0.998008	0.0201759
ELOVL6	1.00024	1.00004	1.00044	0.0201946
RPRML	1.00813	1.00126	1.01505	0.0202264
SMCHD1	0.999885	0.999788	0.999982	0.0202588
C2orf49	1.00054	1.00008	1.001	0.0202776
FCRL2	0.996209	0.993018	0.999409	0.0202862
GYG1	1.00008	1.00001	1.00014	0.0203031
BRICD5	0.997868	0.996071	0.999668	0.0203165
SHANK2	1.00007	1.00001	1.00013	0.0203309
CATSPERB	0.996857	0.99421	0.999511	0.0203319
ALDOC	1.00007	1.00001	1.00014	0.0203751
ACTR6	1.00037	1.00006	1.00069	0.0204046
BIN2	0.999431	0.99895	0.999912	0.0204162
USP37	0.999515	0.999106	0.999925	0.0204196
UBAP1L	0.996334	0.993246	0.999432	0.0204218
PTCHD3	1.00936	1.00144	1.01733	0.0204272
TMEM92	1.00049	1.00008	1.0009	0.0204341
ADK	1.00009	1.00001	1.00016	0.020436
ZNF671	0.997281	0.994988	0.99958	0.0204469
DNTTIP1	1.00024	1.00004	1.00044	0.0204514
TBX3	1.00023	1.00004	1.00043	0.0204912
EVI2B	0.99964	0.999335	0.999944	0.0204944
RPN2	1.00001	1	1.00003	0.0205358
CEBPD	0.999939	0.999888	0.999991	0.0205455
TGDS	1.00075	1.00011	1.00138	0.0205461
KIAA0226L	0.998996	0.998146	0.999846	0.0205821
2021-09-15	1.00005	1.00001	1.00009	0.0206181
CCDC122	1.00188	1.00029	1.00347	0.0206395
MFSD7	0.99897	0.998098	0.999842	0.0206479
PIAS4	0.999607	0.999275	0.99994	0.0206649
PTX3	1.00026	1.00004	1.00048	0.0207372
ZFP2	0.987064	0.976232	0.998016	0.0207377
ULK3	0.999805	0.999639	0.99997	0.0207478
ZNF667	0.998321	0.9969	0.999744	0.0207682
NDUFA4	1.00004	1.00001	1.00008	0.0208023
AKAP17A	0.999788	0.999609	0.999968	0.0208031
AMY2B	0.997925	0.996169	0.999684	0.0208124
POMP	1.00005	1.00001	1.00009	0.0208243
CYP8B1	0.981858	0.966731	0.997223	0.020831
TXNDC12	1.0001	1.00002	1.00019	0.0208322
TRIM15	1.00192	1.00029	1.00355	0.0209591
PIDD1	0.999664	0.999379	0.999949	0.0209699
MYO1B	1.00001	1	1.00003	0.0209785
EPC1	0.999467	0.999015	0.99992	0.0210078
SYNGR3	0.999517	0.999106	0.999927	0.0210218
EP400NL	0.999035	0.998216	0.999855	0.0210696
OR6S1	0.751376	0.589353	0.957942	0.0210716
KDELR2	1.00002	1	1.00004	0.0210782
SMKR1	1.0016	1.00024	1.00296	0.0211801
AF196779.12	0.800792	0.662932	0.96732	0.0211863
TMEM177	1.00042	1.00006	1.00077	0.0212162
MICU2	1.00029	1.00004	1.00054	0.0212205
TRIB3	1.00004	1.00001	1.00008	0.0212344
TIFAB	0.997324	0.995052	0.9996	0.0212375
BCAM	1.00001	1	1.00002	0.0212398
ADAMTS10	0.998771	0.997726	0.999817	0.0212572
HIVEP1	0.999867	0.999753	0.99998	0.0212959
FAM83E	0.999744	0.999526	0.999962	0.021308
TMIGD2	0.995185	0.991104	0.999283	0.0213217
STX3	1.00018	1.00003	1.00033	0.0213467
LDLRAD4	0.999749	0.999535	0.999963	0.0213475
ELP4	1.00057	1.00009	1.00106	0.0213748
TRIM10	1.00697	1.00103	1.01294	0.02144
PTTG1IP	1.00003	1	1.00006	0.021444
CNTD1	0.996494	0.993515	0.999482	0.0214898
AP2M1	1.00001	1	1.00001	0.0215035
TMEM179B	1.00019	1.00003	1.00034	0.0215617
EPB41	0.999791	0.999612	0.999969	0.0215957
TOR1B	1.00027	1.00004	1.0005	0.021627
LCORL	0.998955	0.998064	0.999847	0.0216484
FRMD5	1.00061	1.00009	1.00112	0.0216608
SRSF9	1.00012	1.00002	1.00022	0.0216816
CD244	0.997525	0.995416	0.999638	0.0217048
ABCA10	0.997824	0.99597	0.999682	0.0217437
PCSK2	1.00012	1.00002	1.00022	0.021782
CREB3L3	0.969191	0.943621	0.995454	0.0217944
FGA	1.001	1.00015	1.00186	0.0218108
NONO	1.00003	1	1.00006	0.0218122
ZSWIM2	1.06276	1.00889	1.11951	0.0218297
NKX2-3	0.998891	0.997943	0.999839	0.0218516
CARS2	1.00011	1.00002	1.0002	0.0218684
TRAPPC6B	1.00031	1.00004	1.00058	0.0219002
CAPN7	0.999543	0.999152	0.999934	0.0219029
SCCPDH	1.00016	1.00002	1.00029	0.0219175
C12orf74	0.976407	0.956667	0.996553	0.0219471
GMFG	0.999639	0.99933	0.999948	0.0219644
TRIOBP	0.999669	0.999386	0.999952	0.0220389
MAMDC4	0.999264	0.998634	0.999894	0.0220526
SRP9	1.00007	1.00001	1.00013	0.0220549
TSPAN6	1.00011	1.00002	1.00021	0.0220576
ZNF662	0.998376	0.996988	0.999766	0.0220596
ELK4	0.999862	0.999744	0.99998	0.0220599
ANKLE1	0.998334	0.99691	0.999761	0.0220942
ATP4A	1.00453	1.00065	1.00843	0.0221142
IL21R	0.999483	0.99904	0.999926	0.0221193
RAB32	1.00013	1.00002	1.00023	0.0221208
C3orf52	1.00033	1.00005	1.00062	0.0221333
TMEM87A	1.00009	1.00001	1.00017	0.0221731
KMT2C	0.9999	0.999815	0.999986	0.0221872
ACOX3	0.999715	0.999471	0.999959	0.0222078
FAM193B	0.999762	0.999559	0.999966	0.0222232
DENND4B	0.99974	0.999518	0.999963	0.0222787
BRE	1.00028	1.00004	1.00052	0.0223349
AC009336.19	0.94821	0.905909	0.992487	0.0223807
HSP90B1	1.00001	1	1.00002	0.0223874
CDKN1B	0.999845	0.999713	0.999978	0.0223932
ADAM17	1.00009	1.00001	1.00017	0.0224234
FAM220A	1.00025	1.00004	1.00046	0.0224267
ANKRD13A	0.999843	0.999708	0.999978	0.0224306
NCSTN	1.00006	1.00001	1.00012	0.0224366
E2F8	0.999476	0.999026	0.999926	0.0224444
TUBA1B	1.00002	1	1.00003	0.0224735
RTN4	1.00002	1	1.00004	0.022489
TMEM181	1.00017	1.00002	1.00032	0.0224985
FCGR2A	1.00011	1.00002	1.0002	0.0225941
BEND5	0.997298	0.994981	0.99962	0.022617
CSK	0.999904	0.999821	0.999987	0.0226597
CYTH1	0.999896	0.999806	0.999985	0.0226716
LHX4	0.992006	0.985179	0.99888	0.0227192
GABARAPL2	1.00013	1.00002	1.00024	0.0227696
C20orf173	0.843582	0.728693	0.976585	0.0227769
CLEC4C	0.98172	0.96625	0.997437	0.0228102
PSD4	0.999892	0.9998	0.999985	0.0228445
ELFN2	1.00053	1.00007	1.00098	0.022846
NSMCE2	1.00029	1.00004	1.00054	0.0228487
OR8G5	1.02008	1.00276	1.03769	0.0228519
ZNF37A	0.999548	0.999158	0.999937	0.0228604
ARF3	1.00004	1.00001	1.00007	0.0228618
B9D2	0.998655	0.997498	0.999814	0.0228872
ZNF10	0.998701	0.997583	0.99982	0.0229055
PARD3B	0.999558	0.999178	0.999939	0.0229231
ZNF852	0.992659	0.986375	0.998982	0.022946
KANK3	0.997833	0.995969	0.9997	0.0229503
PDE6C	0.971477	0.947547	0.996013	0.0229709
PRELID2	1.00102	1.00014	1.0019	0.022977
EIF2S3	1.00004	1	1.00007	0.0229934
PTF1A	1.01712	1.00234	1.03211	0.0230199
STARD4	1.00017	1.00002	1.00032	0.0230447
FOPNL	1.00016	1.00002	1.0003	0.0230788
CSTF2	1.00027	1.00004	1.00051	0.0230872
IL3RA	0.999276	0.998652	0.999901	0.0231013
RBM27	1.00046	1.00006	1.00085	0.0231194
FLI1	0.999623	0.999298	0.999948	0.0231404
SEC14L2	1.00007	1.00001	1.00013	0.0231472
FAM210A	1.00018	1.00002	1.00033	0.0231492
LYRM2	1.00028	1.00004	1.00052	0.0231659
MON2	0.999761	0.999555	0.999967	0.0231692
TPP2	1.00017	1.00002	1.00031	0.0232701
MYSM1	0.999632	0.999314	0.99995	0.0232784
CREBRF	0.999546	0.999154	0.999938	0.0232805
NUFIP1	1.00082	1.00011	1.00153	0.0232869
GORASP2	1.00008	1.00001	1.00016	0.0232884
ANXA8	1.00006	1.00001	1.0001	0.0232992
PKHD1	1.001	1.00014	1.00186	0.0233027
ING4	0.999712	0.999464	0.999961	0.0233156
FAM214A	0.999758	0.999549	0.999967	0.0233257
LGALS9	0.999913	0.999838	0.999988	0.0233868
WWC2	1.00031	1.00004	1.00057	0.0234037
NCF4	0.999518	0.999102	0.999935	0.0234091
ST8SIA1	0.999337	0.998763	0.99991	0.0234225
APCDD1L	1.00021	1.00003	1.00039	0.0234552
NRIP2	0.996829	0.994093	0.999571	0.0234577
RCSD1	0.999644	0.999335	0.999952	0.0234586
PBRM1	0.999838	0.999698	0.999978	0.0234615
CEP120	0.999477	0.999024	0.99993	0.0235311
TRMT44	0.999284	0.998664	0.999904	0.0235341
PIK3R6	0.997478	0.995299	0.999661	0.0235778
PLK1	1.00009	1.00001	1.00017	0.0236012
FAM49B	1.00008	1.00001	1.00016	0.0236038
PTPRN2	0.999205	0.998517	0.999894	0.0236456
EIF1AX	1.00009	1.00001	1.00018	0.0236481
RANBP17	0.998893	0.997934	0.999852	0.0236771
KIF5A	1.00133	1.00018	1.00249	0.0236794
F5	0.998895	0.997939	0.999852	0.0236919
MAPK8IP1	1.00016	1.00002	1.0003	0.0237048
DNAJC15	1.00013	1.00002	1.00024	0.0237603
GPR180	1.00033	1.00004	1.00061	0.0238028
HMGXB3	1.00019	1.00003	1.00036	0.0238159
C9orf153	1.05952	1.0077	1.11402	0.0238439
PRKAB2	1.00017	1.00002	1.00031	0.0238881
C3orf33	1.00116	1.00015	1.00217	0.0238915
NAA11	1.00113	1.00015	1.00212	0.0238999
TAGAP	0.999552	0.999163	0.999941	0.023913
TARS	1.00005	1.00001	1.00009	0.0239162
PTCHD4	1.00117	1.00015	1.00218	0.0239263
RNF207	0.999503	0.999073	0.999934	0.0239445
RPS4Y2	0.883506	0.793439	0.983797	0.0239624
STX1A	1.00053	1.00007	1.001	0.0240378
OR10H5	0.619243	0.408386	0.938969	0.0240423
CXCR4	0.999917	0.999845	0.999989	0.0240598
ISCA1	1.00029	1.00004	1.00054	0.0240913
MRPL32	1.00014	1.00002	1.00027	0.0241123
FO538757.2	0.99725	0.994866	0.999639	0.0241159
ADH7	1.00003	1	1.00005	0.0241216
KIAA1522	0.999971	0.999945	0.999996	0.0241429
SLC25A21	1.00208	1.00027	1.00389	0.024163
IFFO1	0.999352	0.998789	0.999915	0.0241804
BAG3	1.00004	1.00001	1.00008	0.0242224
VPS33B	1.00054	1.00007	1.00101	0.0242263
KIAA1217	0.999948	0.999903	0.999993	0.0242318
ADARB2	0.999257	0.998611	0.999903	0.0242661
KCTD5	1.00014	1.00002	1.00027	0.0242708
ATP5G3	1.00002	1	1.00004	0.0242765
APBB1IP	0.999539	0.999137	0.99994	0.0242787
EIF3H	1.00003	1	1.00006	0.0243384
SURF4	1.00002	1	1.00004	0.0243604
CCDC113	1.00059	1.00008	1.00111	0.0243694
HS3ST1	1.00017	1.00002	1.00032	0.0243761
ACAA1	0.999833	0.999687	0.999978	0.0244038
ADAM33	0.998815	0.997784	0.999847	0.0244097
SERPINH1	1.00001	1	1.00002	0.0244432
TRAT1	0.997672	0.995649	0.9997	0.0244444
USP14	1.00005	1.00001	1.0001	0.0244876
CHD3	0.999958	0.999921	0.999995	0.024526
IL9R	0.994871	0.99042	0.999342	0.0246015
RP11-548K23.11	2.06203	1.09695	3.87616	0.0246193
NUDCD2	1.0004	1.00005	1.00076	0.0246505
ALOX12B	0.999937	0.999883	0.999992	0.024663
SH2B1	0.999771	0.999572	0.999971	0.024667
SPATA32	0.972577	0.949268	0.996459	0.0246692
KIF21B	0.999453	0.998977	0.999931	0.024754
COG1	1.00037	1.00005	1.00068	0.0248557
RNASE3	1.04575	1.00567	1.08743	0.0248604
CDHR5	0.978975	0.96097	0.997318	0.0248671
RGL1	0.999718	0.999471	0.999964	0.0248933
ARL14EPL	1.01537	1.00193	1.029	0.0249071
FLOT1	1.00005	1.00001	1.00009	0.0249749
SCARA5	0.999496	0.999055	0.999937	0.0249754
PTPN13	0.999955	0.999916	0.999994	0.0250021
NPW	1.00013	1.00002	1.00024	0.0250307
GMPPB	0.999588	0.999227	0.999948	0.0250809
PLEKHG2	0.999788	0.999603	0.999974	0.0250814
AKIRIN2	1.00017	1.00002	1.00032	0.0250975
ARL2BP	1.00078	1.0001	1.00147	0.0251076
CRKL	1.00002	1	1.00005	0.0251099
RNF225	0.997738	0.995762	0.999718	0.0251865
RRP15	1.00036	1.00004	1.00067	0.025199
HMGN4	1.00018	1.00002	1.00034	0.0252228
YWHAQ	1.00002	1	1.00003	0.0252449
TADA2A	0.999421	0.998914	0.999928	0.0252576
TMED7	1.00009	1.00001	1.00017	0.0252684
SOAT1	1.00016	1.00002	1.00029	0.0252804
C21orf91	0.999833	0.999686	0.999979	0.0253182
GABARAPL1	1.00008	1.00001	1.00016	0.0253336
DNAJC12	1.00118	1.00015	1.00222	0.02536
RP11-468E2.2	0.924787	0.86352	0.990401	0.0253674
CCDC24	0.999579	0.99921	0.999948	0.0253683
RABEP2	0.999725	0.999485	0.999966	0.0253755
ODF1	0.763684	0.60292	0.967316	0.0253844
E2F4	1.00009	1.00001	1.00018	0.025399
KDELR1	1.00004	1	1.00008	0.0254446
LRP2	1.00081	1.0001	1.00153	0.025496
RNPEP	1.00008	1.00001	1.00015	0.0255045
NOTCH1	0.999961	0.999927	0.999995	0.0255225
SATB1	0.999706	0.999448	0.999964	0.0255228
CRYBA1	1.06026	1.00719	1.11612	0.0255236
IL26	0.969143	0.942845	0.996175	0.0255496
LIMS1	1.00009	1.00001	1.00016	0.0255513
TNFRSF17	0.998381	0.996962	0.999802	0.0255774
DNAJC19	1.00023	1.00003	1.00043	0.0255838
PMM2	1.00039	1.00005	1.00073	0.0256423
LGALS2	0.998784	0.997718	0.999852	0.0256457
SFSWAP	0.999732	0.999497	0.999967	0.0256488
POPDC3	1.00033	1.00004	1.00063	0.025649
AD000671.6	0.921732	0.858036	0.990157	0.0257012
ZCCHC12	1.00475	1.00057	1.00894	0.0257225
PTPN7	0.999748	0.999527	0.999969	0.0257327
EMC8	1.00025	1.00003	1.00048	0.0257576
NAE1	1.00016	1.00002	1.0003	0.0257614
KLK2	1.00069	1.00008	1.00129	0.025767
DEF6	0.999801	0.999626	0.999976	0.0257735
L3MBTL1	0.99884	0.997821	0.99986	0.0257767
ZNF605	0.999346	0.998771	0.999921	0.0257854
CPEB3	0.999088	0.998287	0.99989	0.0258116
SPATA7	1.00103	1.00012	1.00194	0.0258141
MED25	0.999801	0.999626	0.999976	0.0258152
C5orf56	0.998849	0.997838	0.999861	0.0258431
PSTPIP1	0.999428	0.998925	0.999931	0.0258869
RHOH	0.999421	0.998912	0.99993	0.0258927
CHMP7	0.999769	0.999565	0.999972	0.0258958
RLN3	0.854939	0.744778	0.981393	0.0259587
ZNF644	0.999749	0.999529	0.99997	0.0259725
GSPT2	1.00053	1.00006	1.001	0.0259849
RINL	0.999304	0.998692	0.999917	0.0260146
HDAC6	0.999741	0.999514	0.999969	0.0260597
MORN4	1.00137	1.00016	1.00258	0.0260967
BBS2	1.00034	1.00004	1.00064	0.0260983
HYPK	0.99542	0.991401	0.999455	0.0261335
NCKAP1L	0.999855	0.999727	0.999983	0.0261379
BSDC1	0.999865	0.999747	0.999984	0.0261393
RPL26L1	1.00032	1.00004	1.00059	0.0261948
ANKRD9	0.999843	0.999705	0.999981	0.0261984
CEBPZ	1.00016	1.00002	1.00031	0.0262335
ABHD17A	0.999741	0.999513	0.999969	0.0262499
FOXL2NB	1.00145	1.00017	1.00273	0.0263239
CBFB	1.00016	1.00002	1.00029	0.026362
PCM1	0.999906	0.999823	0.999989	0.026425
FAM212A	0.999507	0.999073	0.999942	0.0264452
CSRP2	0.999929	0.999867	0.999992	0.0264515
LRMP	0.9995	0.999059	0.999942	0.0264643
SAFB2	0.999768	0.999563	0.999973	0.0264644
VCX3A	1.00326	1.00038	1.00614	0.0264697
ZNF493	0.998183	0.99658	0.999788	0.0264723
AF165138.7	0.931247	0.874448	0.991737	0.0265285
RGCC	1.00008	1.00001	1.00015	0.0265335
ADAM18	1.03708	1.00425	1.07099	0.0265353
TMEM14C	1.00008	1.00001	1.00015	0.0265946
IAPP	1.055	1.00622	1.10615	0.0266573
AC004076.9	1.06061	1.00683	1.11726	0.0266713
GARNL3	0.998561	0.997289	0.999834	0.0266837
NPIPA5	0.994842	0.990301	0.999403	0.0267053
PSMD12	1.00012	1.00001	1.00022	0.0267321
THUMPD2	1.00072	1.00008	1.00137	0.0267581
TSG101	1.00013	1.00001	1.00024	0.0267782
SREBF1	0.999973	0.999949	0.999997	0.0267899
NBPF26	0.997282	0.994883	0.999687	0.0267931
DHX16	1.00009	1.00001	1.00017	0.0268041
F3	1.00001	1	1.00002	0.0268731
BACE2	1.00009	1.00001	1.00016	0.0269107
TERT	0.996079	0.992619	0.999552	0.0269414
ALDH16A1	0.999874	0.999763	0.999986	0.0269619
ZNF596	0.996791	0.993957	0.999634	0.0269723
MUL1	1.00015	1.00002	1.00029	0.0270661
USH2A	1.00811	1.00092	1.01536	0.0270758
TSN	1.00009	1.00001	1.00016	0.0270917
AGMO	1.00208	1.00024	1.00394	0.0270943
TBCA	1.00009	1.00001	1.00018	0.027127
ACTL10	0.998415	0.997011	0.999821	0.0271482
PPHLN1	1.00026	1.00003	1.00049	0.0271755
SPRYD7	1.00034	1.00004	1.00064	0.0272044
CCDC150	0.99807	0.99636	0.999783	0.0272061
PNMAL2	0.998071	0.996362	0.999783	0.0272482
ALDH1B1	1.00012	1.00001	1.00024	0.0273271
TRPV1	0.971116	0.946153	0.996739	0.0273991
ESR1	0.999564	0.999176	0.999951	0.0274391
KRTAP19-1	1.00216	1.00024	1.00408	0.0274541
MEGF10	0.999714	0.99946	0.999968	0.0274563
MUM1	0.99971	0.999453	0.999968	0.0274827
IARS2	1.00007	1.00001	1.00013	0.0274884
NPY5R	0.92311	0.859719	0.991175	0.0275134
STK17A	1.00004	1	1.00007	0.0275842
FCRL5	0.999573	0.999194	0.999953	0.0275855
ERAL1	1.00013	1.00001	1.00025	0.0276215
AGPAT9	1.00026	1.00003	1.0005	0.0276331
DBP	0.99973	0.999489	0.99997	0.0276796
ZNF684	0.99598	0.992415	0.999558	0.0276862
ASMT	1.00653	1.00072	1.01238	0.0276871
LRP4	1.00011	1.00001	1.0002	0.0276879
IGFLR1	0.997504	0.995287	0.999726	0.0277007
DUSP10	1.00014	1.00002	1.00027	0.0277044
GGA2	0.999929	0.999865	0.999992	0.0277056
UBQLN1	1.00005	1.00001	1.00009	0.0277189
BAP1	0.999896	0.999803	0.999989	0.0277449
CBLN2	0.998923	0.997964	0.999882	0.0277794
KPNB1	1.00004	1	1.00007	0.0278422
ZNF382	0.993961	0.988609	0.999343	0.0279031
FAM120A	1.00004	1	1.00007	0.0279575
SYT15	1.0059	1.00064	1.01119	0.02798
PAXBP1	0.999574	0.999194	0.999954	0.0279974
RHPN2	1.00034	1.00004	1.00065	0.0280121
SH3KBP1	1.0001	1.00001	1.0002	0.0280127
SGCE	1.00015	1.00002	1.00029	0.0280371
PMFBP1	1.0017	1.00018	1.00322	0.0280779
ULBP2	1.0002	1.00002	1.00038	0.0281239
C18orf42	0.66323	0.459686	0.956901	0.0281271
MAGEB2	1.00016	1.00002	1.0003	0.0281388
CDKN2C	0.999873	0.99976	0.999986	0.0281424
SAMD10	0.999325	0.998722	0.999928	0.0281802
NMUR2	1.00139	1.00015	1.00263	0.0281924
NRSN2	1.00018	1.00002	1.00033	0.0281967
PGC	1.00479	1.00051	1.00909	0.0282055
PAIP2	1.0002	1.00002	1.00037	0.0282667
YPEL3	0.999806	0.999632	0.999979	0.028278
SLC5A2	0.981672	0.965576	0.998037	0.0283118
PIGH	1.00048	1.00005	1.0009	0.0283226
ZNF236	0.999387	0.99884	0.999935	0.028325
JMJD8	0.999771	0.999567	0.999976	0.0283335
OSBPL7	0.99922	0.998523	0.999917	0.0283483
PRMT5	1.00008	1.00001	1.00015	0.0283503
CCBL2	0.999649	0.999334	0.999963	0.0283645
OR51J1	1.13333	1.01333	1.26754	0.0283909
PSMF1	1.00005	1.00001	1.0001	0.0284072
ZNF135	0.997047	0.994414	0.999688	0.0284415
NAP1L2	1.00063	1.00007	1.0012	0.0284516
RYR2	1.00037	1.00004	1.00071	0.0284742
DLG5	0.999935	0.999877	0.999993	0.0284745
INHBB	1.00015	1.00002	1.00028	0.0285069
KLF11	0.999759	0.999543	0.999975	0.028576
DRG1	1.00009	1.00001	1.00017	0.0285817
CFL2	1.0001	1.00001	1.0002	0.0285838
NCOA1	0.999857	0.999728	0.999985	0.0285991
MMS19	1.00015	1.00002	1.00028	0.0285993
ZNF354C	0.998844	0.99781	0.999879	0.0286341
WDR44	1.00024	1.00003	1.00046	0.0286779
NGFRAP1	1.00005	1	1.00009	0.0287511
ZNF678	0.998738	0.997608	0.999869	0.0287596
SHC1	1.00003	1	1.00005	0.0289369
IFT140	0.999602	0.999244	0.999959	0.0289454
LAMTOR1	1.00003	1	1.00006	0.0290662
FAM187B	0.90956	0.835304	0.990418	0.0291427
UHRF2	1.00009	1.00001	1.00018	0.0291506
EYA3	0.999729	0.999486	0.999973	0.0291828
MYO3A	0.999576	0.999195	0.999957	0.0291979
ATP6AP1	1.00004	1	1.00008	0.0292122
COPA	1.00003	1	1.00006	0.0292164
[truncated: 738 more rows]
