# Supplementary material for: An Integrated Analysis of Prognostic Signature and Immune Microenvironment in Tongue Squamous Cell Carcinoma
Source: Front Oncol. 2022 Jul 13;12:891716. doi: 10.3389/fonc.2022.891716 (PMC9326056; doi:10.3389/fonc.2022.891716)
Supplement: Supplementary Table 2 — The different expressed genes in TCGA in comparison of cancer and normal tissue. [file Table_2.xlsx]

## Sheet: sheet 1
Gene	logFC	P.Value	adj.P.Valule
HTN1	-12.3525	1.71e-65	2.94e-113
BPIFA2	-11.9867	6.53e-68	1.17e-82
HTN3	-11.9861	1.44e-41	3.94e-82
PRR27	-11.8156	4.48e-51	1.3e-81
LCN1	-10.6503	4.5e-26	7.67e-78
CST4	-10.5769	2.82e-73	1.83e-75
CST5	-10.4941	6.67e-51	9.61e-75
SMR3B	-9.77527	2.12e-33	1.94e-74
CA6	-9.7504	8.85e-50	1.76e-72
CST2	-9.66705	1.24e-28	2.63e-71
AMY1B	-9.23694	1.66e-09	2.86e-71
STATH	-9.05646	1.99e-50	4.43e-70
PRH1	-9.00797	7.42e-118	8.58e-70
PRB4	-8.73401	3.54e-32	6.98e-69
KRT35	-8.68084	1.2e-22	8.25e-68
HSD3B1	-8.63319	5.84e-13	2.27e-66
THRSP	-7.93028	2.05e-54	6.43e-66
PRH2	-7.71822	6.36e-36	3.34e-65
KRTAP3-3	-7.71106	3.84e-25	3.68e-65
KRTAP13-1	-7.62341	3.29e-23	5.78e-65
PIP	-7.61754	1.91e-30	1.23e-64
LPO	-7.56977	9.2e-63	4.07e-64
KRT85	-7.32786	1.02e-38	2.28e-63
KRTAP1-3	-7.2153	0.0029688	2.83e-62
ZG16B	-7.09021	4e-60	1.06e-60
OPRPN	-7.02441	1.62e-23	4.01e-60
NXPE4	-6.93178	2.29e-29	9.01e-60
KRTAP1-1	-6.75813	2.5e-06	1.18e-59
MUC7	-6.569	3.08e-20	1.18e-59
LACRT	-6.51651	5.56e-09	1.18e-59
PRB3	-6.49666	3.08e-45	1.21e-59
AMY1A	-6.42848	0.000151773	7.98e-59
KRT36	-6.34197	1.06e-37	1.56e-58
KRT25	-6.33257	7.76e-11	1.78e-58
MYOC	-6.32461	8.39e-38	1.12e-57
BPIFA4P	-6.25903	0.0130736	2.75e-57
NA	-6.23811	1.65e-23	4.16e-57
PRB1	-6.15006	8.7e-20	6.07e-57
KRTAP16-1	-6.01121	0.0120402	7.09e-57
KRT71	-5.95581	1.48e-10	7.09e-57
KRT84	-5.95305	3.7e-43	1.18e-55
SCGB3A2	-5.91613	3.46e-35	2.78e-55
CRISP3	-5.90362	1.4e-34	3.65e-55
KLK1	-5.8571	1.8e-33	4.31e-55
LINC01829	-5.79356	6.93e-64	1.68e-54
EDN3	-5.72791	4.32e-36	2.19e-54
KRTAP11-1	-5.67138	2.15e-14	3.33e-54
UGT2B11	-5.65644	0.00014967	9.58e-54
KRTAP13-2	-5.6509	3.57e-14	1.29e-53
LINC02303	-5.6311	1.21e-21	1.3e-53
PYGM	-5.62528	1.3e-39	2.38e-53
LRTM1	-5.53132	1.77e-40	2.73e-53
KRTAP7-1	-5.52295	0.00074189	9.94e-53
MUC22	-5.50075	4.42e-30	1.89e-52
KRTAP3-2	-5.46581	4.26e-31	2.42e-52
KRT76	-5.44083	2.75e-31	2.53e-52
CLCNKB	-5.43662	3.09e-58	2.73e-52
METTL21EP	-5.41302	4.59e-44	3.49e-52
CIDEC	-5.41017	1.31e-52	4.25e-52
PLIN1	-5.39469	2.92e-68	1.09e-51
TMEM213	-5.39237	6.24e-24	1.16e-51
C6orf58	-5.38476	2.69e-26	1.25e-51
SMCO1	-5.36732	5.59e-53	1.31e-51
BPIFA1	-5.33618	1.34e-05	1.38e-51
FBP2	-5.33174	1.58e-48	2.07e-51
MIR133A1HG	-5.32228	2.66e-31	2.38e-51
ATP2A1	-5.31543	5.34e-39	3.05e-51
SPHKAP	-5.31413	6.12e-09	3.38e-51
DHRS7C	-5.29345	4.57e-19	3.8e-51
ANKRD66	-5.26971	3.75e-10	4.13e-51
KRT4	-5.22121	8.67e-32	1.35e-50
KRTAP4-8	-5.20217	0.00621019	2.91e-50
ADH1B	-5.20146	4.52e-35	6.66e-50
FABP9	-5.19033	0.00083985	8.24e-50
SNTN	-5.18229	7.7e-18	1.06e-49
ADIPOQ	-5.17813	6.99e-16	1.47e-49
DCD	-5.14847	6.13e-13	2.02e-49
FABP7	-5.1467	1.93e-41	2.23e-49
C20orf85	-5.1447	5.17e-08	2.69e-49
CSN2	-5.14144	2.2e-17	9.35e-49
SRGAP3-AS2	-5.12638	5.63e-09	1.01e-48
LOC646588	-5.12279	8.88e-44	1.14e-48
DNASE2B	-5.11121	5.64e-07	1.27e-48
ETNPPL	-5.0779	2.96e-25	1.48e-48
GPD1	-5.07361	1.52e-68	1.95e-48
LRRC26	-5.06156	1.92e-26	2.87e-48
C9orf135	-5.05059	9.04e-18	3.48e-48
LOC105372441	-5.04812	1.46e-12	4.6e-48
KRTAP3-1	-5.04491	1.2e-17	5.04e-48
KRTAP1-5	-5.03455	6.07e-07	5.81e-48
MORN5	-5.03138	7.12e-19	6.17e-48
PEBP4	-5.02982	8.19e-38	6.26e-48
FSD2	-5.02124	1.58e-50	6.26e-48
C1orf194	-5.01582	3.45e-09	7.42e-48
NT5C1A	-4.99685	5.05e-28	7.58e-48
CALML6	-4.98938	5.37e-55	7.58e-48
TMPRSS11B	-4.98096	6.19e-29	7.89e-48
C1orf87	-4.97141	3.22e-19	8.09e-48
CA3	-4.96777	2.04e-36	1.1e-47
MYLK3	-4.96765	6.3e-40	1.16e-47
FBXO40	-4.9615	3.93e-23	1.18e-47
ASCL3	-4.93308	3e-19	1.45e-47
SMR3A	-4.92928	4.87e-08	2.22e-47
CFTR	-4.92701	2.91e-38	2.67e-47
KBTBD13	-4.91889	2.01e-22	2.79e-47
HCG22	-4.87544	4.29e-42	3.07e-47
C11orf97	-4.87387	0.000664916	3.21e-47
ERICH3	-4.86662	1.33e-35	4.38e-47
GPR12	-4.85456	2.7e-25	4.63e-47
PIH1D3	-4.85424	3.35e-06	4.91e-47
ABRA	-4.83625	2.77e-25	5.05e-47
CASQ1	-4.81165	1.57e-28	5.17e-47
SLC8A1-AS1	-4.80759	6.65e-75	5.17e-47
ENO3	-4.80343	5.02e-43	1.11e-46
CYP2F1	-4.78977	1.6e-26	1.53e-46
KRTAP9-4	-4.78851	2.9e-05	1.88e-46
SPINK9	-4.78034	4.89e-27	2.79e-46
FAM216B	-4.77482	1.72e-17	3.6e-46
MYH7	-4.77321	1.25e-20	3.63e-46
MAL	-4.76847	4.25e-33	3.68e-46
LINC02160	-4.76548	3.64e-09	4.8e-46
FNDC5	-4.76319	3.56e-54	6.19e-46
MUC21	-4.74965	1.06e-22	6.68e-46
TRARG1	-4.71944	1.94e-33	6.92e-46
CYP4F35P	-4.71658	1.09e-35	7.65e-46
IDI2	-4.70809	5.59e-40	8.1e-46
C16orf89	-4.68219	5.35e-48	1.18e-45
ASB11	-4.67249	8.32e-21	1.24e-45
CFAP65	-4.66806	3.36e-20	1.52e-45
FAM81B	-4.66561	1.44e-08	1.62e-45
METTL21C	-4.66012	5.73e-19	1.95e-45
C1orf158	-4.64094	2.86e-22	2.91e-45
KLHL33	-4.63988	5.18e-33	2.98e-45
MS4A8	-4.61956	3.1e-14	3.01e-45
PPDPFL	-4.60597	7.58e-14	3.26e-45
LINC00443	-4.60487	2.56e-29	7.03e-45
TMEM212	-4.60416	1.23e-12	8.01e-45
DNAI1	-4.60388	9.2e-08	8.37e-45
APOBEC4	-4.60009	5.94e-12	9.32e-45
CAPSL	-4.5917	3.07e-27	9.85e-45
CALHM4	-4.59088	1.89e-05	1.01e-44
LTF	-4.58623	1.17e-22	1.65e-44
TEKT1	-4.57781	2.38e-10	1.92e-44
ARMC3	-4.57079	6.6e-07	2.06e-44
CHRM1	-4.54857	8.61e-24	2.29e-44
PPP1R3A	-4.54365	2.29e-14	2.4e-44
HMGCS2	-4.53998	2.54e-23	2.43e-44
SLC13A2	-4.53974	7.41e-32	2.71e-44
LDB3	-4.53872	9.23e-32	3.83e-44
MPO	-4.53861	2.76e-69	3.92e-44
PIGR	-4.52974	2.68e-22	3.97e-44
CRNN	-4.52612	1.21e-21	4.85e-44
MYOZ1	-4.51832	1.83e-26	5.02e-44
OMG	-4.51358	9.78e-63	6.43e-44
CYP4F29P	-4.50492	1.26e-26	6.43e-44
BPIFB1	-4.50309	8.89e-14	6.55e-44
RSPH1	-4.49682	3.64e-12	7.62e-44
CRISP2	-4.48372	2.09e-12	1.25e-43
WDR38	-4.4733	1.65e-10	1.91e-43
ELOVL3	-4.47078	3.1e-24	2.61e-43
LINC01028	-4.46944	4.61e-15	2.76e-43
LINC02487	-4.46312	1.52e-29	3.43e-43
KRT33B	-4.4618	7.33e-32	3.68e-43
CCDC33	-4.43707	7.57e-08	3.98e-43
ART1	-4.4342	1.97e-18	4.45e-43
C1orf141	-4.4322	4.95e-05	4.58e-43
EXTL1	-4.42325	4.38e-40	5.17e-43
DYNAP	-4.42274	1.51e-18	6.21e-43
TMEM210	-4.41876	1.03e-24	6.51e-43
MB	-4.41587	2.26e-25	6.6e-43
AKAP14	-4.41509	2.83e-05	7.25e-43
MUC19	-4.41444	3.17e-23	9.81e-43
PLIN4	-4.41338	1.74e-56	1.14e-42
CKM	-4.40079	1.7e-20	1.56e-42
STRIT1	-4.39486	1.47e-13	1.56e-42
ACTN3	-4.39463	3.15e-36	1.66e-42
LINC01797	-4.3942	9.73e-07	1.97e-42
IL22	-4.38525	1.43e-20	2.36e-42
LINC01497	-4.38324	5.77e-16	2.41e-42
MYL3	-4.36387	3.85e-23	2.89e-42
TYR	-4.35223	1.03e-12	3.06e-42
GP2	-4.33853	1.25e-09	3.26e-42
MYOM1	-4.32471	1.4e-34	3.55e-42
MUCL3	-4.32401	1.13e-27	3.85e-42
AZGP1	-4.31424	2.36e-27	4.18e-42
HAO2	-4.31395	5.64e-11	4.72e-42
SLC2A4	-4.31189	2.86e-51	4.85e-42
MSTN	-4.30852	2.74e-46	4.99e-42
STMND1	-4.30063	6.04e-29	5e-42
TMEM72	-4.28658	9.69e-29	5.28e-42
UGT2B28	-4.28234	3.72e-09	8.78e-42
TNNC2	-4.27388	3e-24	1.16e-41
LINC02538	-4.26987	7.46e-35	1.22e-41
ASB15	-4.26774	1.25e-18	1.3e-41
LOC285095	-4.26773	2.04e-38	1.34e-41
C1orf189	-4.26188	1.02e-12	1.37e-41
RSPH4A	-4.25707	2.46e-16	1.53e-41
STOML3	-4.25494	2.06e-08	1.64e-41
DMBT1	-4.24832	3.43e-18	1.69e-41
ADH4	-4.23831	1.9e-39	2.02e-41
SRD5A2	-4.23733	1.69e-40	2.16e-41
DNAH12	-4.2369	7.29e-15	2.6e-41
ATP2B2	-4.2353	6.95e-40	2.6e-41
CFAP221	-4.2333	2.16e-29	2.61e-41
KRTAP17-1	-4.23045	0.00576656	2.64e-41
MOGAT1	-4.22972	5.14e-27	3.15e-41
ACSBG1	-4.2266	0.00226766	3.15e-41
AQP4	-4.225	7.59e-22	3.36e-41
SLC5A5	-4.22098	3.77e-25	3.77e-41
BPIFB3	-4.21812	0.00035745	4.51e-41
MGAM2	-4.21353	1.26e-18	5.04e-41
TAC1	-4.19201	7.37e-22	6.37e-41
WFDC6	-4.19146	9.87e-13	6.58e-41
AMPD1	-4.18922	1.24e-26	6.79e-41
ATP6V1B1	-4.1854	1.94e-41	8.53e-41
LDLRAD1	-4.18073	1.76e-24	9.07e-41
MYOZ3	-4.18052	2.51e-29	1.02e-40
TMEM190	-4.17761	0.00281473	1.19e-40
ROPN1L	-4.17725	3.98e-10	1.79e-40
PPP1R1A	-4.17012	2.52e-22	1.81e-40
AADACL3	-4.16987	1.24e-10	2.67e-40
HYDIN	-4.1632	2.7e-25	3.18e-40
CAPN14	-4.15786	3.31e-33	3.76e-40
LINC01489	-4.15539	9.71e-21	5.36e-40
C6orf118	-4.15465	1.44e-05	5.53e-40
HSPB6	-4.1529	2.2e-31	5.85e-40
LRRTM1	-4.15006	1.16e-17	5.95e-40
GPRC6A	-4.14996	3.11e-16	6.41e-40
MC5R	-4.14107	9.09e-26	6.85e-40
LRRC18	-4.14054	9.7e-07	7.01e-40
SPAG6	-4.14005	2.6e-07	7.73e-40
AQP7	-4.1391	1.58e-49	8.85e-40
C14orf180	-4.13176	9.87e-11	1.04e-39
ZMYND10	-4.12999	1.28e-08	1.05e-39
DRC7	-4.12539	7.82e-05	1.12e-39
AQP5	-4.12502	2.66e-22	1.44e-39
CCL28	-4.12481	2.77e-79	1.76e-39
PDK4	-4.12163	9.82e-38	1.86e-39
ATP1A2	-4.11432	1.23e-23	1.87e-39
C5orf49	-4.1123	2.64e-07	1.89e-39
MYH2	-4.11052	4.14e-12	1.95e-39
KRTAP19-3	-4.09508	0.0153195	2.18e-39
KRT78	-4.09388	7.45e-32	2.32e-39
DCT	-4.09128	4.01e-16	2.57e-39
FAM180B	-4.08959	1.69e-37	2.71e-39
TSPAN19	-4.07253	8.94e-06	2.79e-39
MT1A	-4.06704	2.6e-43	2.86e-39
NME5	-4.06207	1.65e-45	2.87e-39
ADGB	-4.05675	3.01e-06	3.09e-39
ACTA1	-4.05205	1.36e-16	4.46e-39
NPY6R	-4.04897	3.38e-18	5.15e-39
PKLR	-4.04761	1.19e-06	6.74e-39
DNAI2	-4.03757	6.01e-07	8.04e-39
FAM3D	-4.0373	6.25e-34	8.37e-39
VWA3B	-4.03139	3.88e-33	1.05e-38
CKMT2	-4.03109	9.74e-28	1.05e-38
SMYD1	-4.03032	8.85e-13	1.1e-38
TCEAL6	-4.02927	1.41e-38	1.36e-38
TGM7	-4.0181	2.36e-20	1.69e-38
COX6A2	-4.00966	3.76e-14	1.83e-38
RPL3L	-4.0074	4e-42	2.1e-38
TEX26	-4.00506	1.45e-21	2.22e-38
CABCOCO1	-4.00504	5.79e-39	2.36e-38
IL12A-AS1	-3.99594	2.47e-72	2.46e-38
PNPLA5	-3.99421	8.86e-11	2.88e-38
C9orf24	-3.99415	1.74e-30	3.05e-38
CYP3A4	-3.99056	4.26e-39	3.09e-38
MYBPC1	-3.98673	5.08e-15	3.44e-38
PRH1-PRR4	-3.98415	3.4e-45	3.76e-38
GADL1	-3.983	2.01e-29	4.06e-38
LINC01405	-3.98044	3.21e-25	4.1e-38
ERBB4	-3.97268	9e-31	4.14e-38
TCHH	-3.96963	4.75e-24	4.22e-38
KRT33A	-3.96877	1.44e-34	4.36e-38
SMTNL1	-3.95268	3.09e-29	5.84e-38
KIAA2012	-3.9525	6.03e-25	7.41e-38
SPX	-3.94865	8.09e-28	8.32e-38
NPY5R	-3.93716	1.29e-22	8.97e-38
OSTN	-3.92858	1.38e-19	9.12e-38
CFAP77	-3.92057	2.1e-05	9.13e-38
KLHL38	-3.91657	8.74e-30	9.84e-38
MUC5AC	-3.91117	2.64e-12	9.84e-38
LYZ	-3.9102	1.21e-41	1.05e-37
WFDC2	-3.90957	6.09e-24	1.25e-37
ATP6V0A4	-3.90952	3.25e-40	1.36e-37
MIR4269	-3.90924	8.83e-18	1.47e-37
CMYA5	-3.90899	4.06e-26	1.66e-37
HTR3B	-3.90377	1.7e-18	1.68e-37
C6	-3.90308	2.49e-17	1.71e-37
ASB10	-3.89905	4.14e-13	1.8e-37
FITM1	-3.89609	5.7e-35	1.85e-37
GSTA2	-3.88643	4.39e-11	1.87e-37
LMOD2	-3.88239	3.68e-13	1.89e-37
ENPP3	-3.88096	7.91e-38	1.93e-37
KCNJ16	-3.8799	4.72e-21	1.98e-37
MYLPF	-3.87667	6.11e-20	2.23e-37
SYPL2	-3.87426	2.22e-27	2.34e-37
CLCA4	-3.87042	6.38e-29	2.51e-37
PIFO	-3.86951	4.73e-52	2.76e-37
CTNNA3	-3.86203	1.79e-23	3.03e-37
LOC107985579	-3.86178	0.0242219	3.16e-37
PANCR	-3.86142	8.13e-13	3.91e-37
CFAP299	-3.86004	0.00227653	4.14e-37
MAP3K19	-3.85969	1.28e-07	4.43e-37
ZBBX	-3.85693	0.000276372	4.5e-37
LRRC2	-3.8535	3.45e-27	4.98e-37
LRRC30	-3.85261	6.29e-11	5.06e-37
MYH6	-3.85228	1.33e-14	6.08e-37
HJV	-3.85213	2.75e-12	6.28e-37
SLC36A2	-3.84014	2.51e-21	6.71e-37
NRG2	-3.83724	4.15e-58	6.76e-37
MUC13	-3.83112	7.7e-10	9.85e-37
XIRP1	-3.83022	5.67e-24	1.06e-36
KRTAP10-2	-3.82788	5.31e-06	1.17e-36
CSN3	-3.81515	1.1e-16	1.18e-36
TPPP2	-3.81458	3.06e-40	1.5e-36
TRDN	-3.81383	2.46e-14	1.62e-36
GYS2	-3.81256	8.62e-21	1.62e-36
SBK2	-3.81243	2.88e-15	1.79e-36
TYRP1	-3.81096	2.26e-26	1.82e-36
CCDC160	-3.81086	1.55e-23	1.94e-36
MYOT	-3.80941	1.27e-20	2.06e-36
TCAP	-3.79962	3.09e-18	2.29e-36
KRT13	-3.78123	3.7e-22	2.47e-36
GJB1	-3.78075	1.49e-18	2.77e-36
CD300LG	-3.77677	3.53e-41	2.97e-36
ASPA	-3.76593	3.35e-51	3.23e-36
KLHL41	-3.76366	1.56e-15	3.8e-36
LY6G6F-LY6G6D	-3.75923	4.18e-06	3.8e-36
MYL2	-3.75333	7.79e-13	3.81e-36
LOC101927596	-3.74959	1.41e-28	4.31e-36
DRC1	-3.74787	2.51e-05	4.51e-36
ESRRG	-3.74583	1.93e-30	4.53e-36
AGBL1	-3.74469	2.59e-13	5.02e-36
DYDC1	-3.73799	0.00704545	5.19e-36
ARSF	-3.73403	2.34e-21	6.5e-36
OLFM4	-3.72212	3.98e-08	6.7e-36
SLC7A14	-3.72158	1.88e-22	6.83e-36
PROM1	-3.71615	5.6e-19	7.99e-36
PLN	-3.71351	2.08e-30	8.39e-36
SPINK14	-3.70892	3.18e-09	8.65e-36
C4orf54	-3.70794	1.11e-19	8.65e-36
SRL	-3.70781	5.42e-23	8.84e-36
C2orf73	-3.70556	2.03e-26	1.02e-35
KRTAP5-7	-3.70354	0.00466285	1.03e-35
S100A1	-3.69953	3.46e-34	1.06e-35
PADI1	-3.69671	2.32e-30	1.06e-35
LINC00330	-3.69297	2.64e-19	1.09e-35
ZBTB16	-3.68785	1.82e-32	1.09e-35
LINC01950	-3.68694	7.56e-14	1.36e-35
SH3BGRL2	-3.6857	2.57e-60	1.5e-35
TNNI2	-3.67982	1.22e-20	1.69e-35
MOGAT2	-3.67674	1.8e-06	1.7e-35
ANKRD20A11P	-3.67139	1.13e-26	1.72e-35
LINGO4	-3.66849	4.52e-31	2.02e-35
IL36A	-3.66119	8.51e-18	2.11e-35
TMCO5A	-3.65233	2.54e-13	2.34e-35
C9orf152	-3.64909	2.74e-24	2.76e-35
NRAP	-3.649	1.13e-11	2.83e-35
TTN	-3.64675	6.8e-20	3.1e-35
KY	-3.64307	9.58e-31	3.18e-35
NCMAP	-3.64109	1.1e-33	3.24e-35
MIR1-1HG	-3.63971	1.63e-09	4.11e-35
CNGA4	-3.63905	2.52e-06	4.65e-35
CACNA1S	-3.63333	5.59e-13	4.76e-35
ALDH1L1-AS2	-3.63217	1.45e-19	5.08e-35
ANGPTL1	-3.61955	5.62e-36	5.61e-35
DNAH9	-3.61928	2.38e-27	5.82e-35
TMEM132C	-3.619	6.14e-25	5.92e-35
UMODL1-AS1	-3.61096	0.00111161	6.03e-35
LINC00332	-3.60949	0.00073728	6.25e-35
SCN7A	-3.60816	4.45e-33	7.6e-35
NEB	-3.6074	2.94e-19	9.61e-35
TGM3	-3.60541	1.27e-16	1.1e-34
FAM107A	-3.6052	1.28e-58	1.27e-34
LSMEM2	-3.59299	1.31e-35	1.46e-34
BSND	-3.58984	5.34e-21	1.65e-34
MYL1	-3.58633	4.11e-10	1.76e-34
FOLR1	-3.58568	8.44e-20	1.76e-34
LRRC14B	-3.58236	1.89e-20	1.89e-34
ANGPTL5	-3.58076	1.02e-19	1.94e-34
KRT31	-3.57608	5.48e-46	1.94e-34
SCGB1D1	-3.57483	3.86e-06	2.03e-34
COX7A1	-3.57341	2.76e-48	2.22e-34
FHL1	-3.57201	1.1e-31	2.22e-34
CFAP43	-3.57013	3.97e-10	2.23e-34
SLC38A3	-3.56748	4.8e-38	2.27e-34
TNNC1	-3.56747	9.29e-16	2.28e-34
SPATA4	-3.56637	4.83e-26	2.29e-34
LOC101927000	-3.55375	1.33e-18	2.57e-34
MRAP	-3.54874	6.04e-38	2.94e-34
FAM92B	-3.54655	0.0134654	3.28e-34
SLC24A5	-3.5462	5.83e-08	3.29e-34
VWA3A	-3.53981	0.00083596	3.44e-34
CLEC3B	-3.53345	3.12e-71	3.47e-34
FMO2	-3.53044	1.44e-25	3.84e-34
PHKG1	-3.52937	8.19e-38	3.97e-34
KRT3	-3.52591	1.97e-17	4.21e-34
HHATL-AS1	-3.5237	2.74e-20	4.43e-34
TTC29	-3.5204	4.65e-08	5.13e-34
SLC5A8	-3.51967	8.72e-11	5.79e-34
NEK10	-3.5183	2.7e-57	6.59e-34
CAPN3	-3.51753	1.49e-40	6.89e-34
PACRG	-3.5167	3.16e-34	7.41e-34
SCN4A	-3.51187	1.53e-16	7.83e-34
MYLK2	-3.50825	1.6e-26	7.97e-34
SERPINA5	-3.50307	1.2e-28	8.19e-34
MYRIP	-3.50253	1.32e-39	8.84e-34
DUSP13	-3.496	5.9e-24	9.03e-34
TNXB	-3.49156	8.46e-39	9.04e-34
ANO5	-3.49108	7.36e-23	9.64e-34
GREM2	-3.48377	5.33e-34	9.93e-34
EFHB	-3.48178	2.41e-44	9.99e-34
HBA1	-3.47775	0.000322258	1.12e-33
SLC27A6	-3.47546	5.08e-21	1.16e-33
LOC100506869	-3.47517	5.59e-14	1.17e-33
ARMC4	-3.47161	0.000164957	1.3e-33
NKAIN3-IT1	-3.47004	9.03e-22	1.33e-33
KRTAP9-8	-3.4674	0.00762697	1.34e-33
RBFOX1	-3.46371	1.38e-15	1.42e-33
CATIP	-3.46198	6.04e-22	1.78e-33
TCTE1	-3.45654	3.36e-16	2.1e-33
CYP4B1	-3.45488	8.72e-22	2.22e-33
KLHL40	-3.45346	4.42e-10	2.8e-33
SPINK8	-3.4381	6.06e-12	2.85e-33
KLHDC7A	-3.43493	1.76e-20	2.96e-33
VIP	-3.43353	3.4e-29	3.17e-33
CIDEA	-3.43255	3.73e-20	3.21e-33
SH3BGR	-3.41819	3.01e-47	3.29e-33
PPP1R42	-3.41332	0.00522038	3.44e-33
ASB12	-3.40874	1.66e-22	3.51e-33
KRT40	-3.40768	4.55e-15	3.52e-33
FAM166B	-3.40595	1.58e-61	3.61e-33
ITPRID1	-3.40451	4.68e-13	3.81e-33
AGR3	-3.39889	1.09e-11	4.79e-33
CLIC5	-3.39282	8.7e-36	5.69e-33
CHST9	-3.39244	1.63e-12	5.69e-33
LOC102724555	-3.38227	2.12e-11	5.9e-33
TESC	-3.38129	1.61e-42	6.22e-33
LOC101927318	-3.36613	5.66e-11	6.61e-33
NXPE2	-3.3638	3.46e-11	7.72e-33
TUSC8	-3.36213	1.55e-08	7.97e-33
TMEM52	-3.36169	2.03e-46	7.99e-33
IL17F	-3.3583	7.37e-15	8.19e-33
OTC	-3.35593	5.67e-16	9.26e-33
ACTN2	-3.35194	1.77e-12	9.87e-33
LRRC39	-3.35179	2.18e-29	1.01e-32
MAPT	-3.34858	1.61e-34	1.01e-32
DNAH6	-3.34724	5.77e-07	1.14e-32
HBA2	-3.34468	8.78e-06	1.14e-32
SPRR3	-3.34275	6.68e-18	1.17e-32
CATSPERD	-3.33553	0.00149649	1.28e-32
PCAT18	-3.33273	1.26e-10	1.3e-32
LINC00551	-3.33251	7.25e-24	1.37e-32
ENDOU	-3.32869	2.09e-22	1.45e-32
CCL15	-3.32547	8.71e-18	1.5e-32
PLIN5	-3.31869	3.13e-40	1.6e-32
PI16	-3.31857	6.66e-19	1.68e-32
LGI1	-3.3183	4.74e-20	1.68e-32
C1QTNF7	-3.31278	1.53e-41	1.85e-32
UPK3A	-3.31057	1.52e-33	1.88e-32
CDHR4	-3.30806	0.00716339	2.07e-32
KCNB1	-3.30717	1.29e-26	2.5e-32
VSIG2	-3.30552	9.24e-26	2.73e-32
TF	-3.30295	1.9e-20	2.98e-32
SLC6A1	-3.2995	3.84e-43	3.44e-32
C10orf71	-3.29924	2.56e-09	3.45e-32
TXLNB	-3.2991	6.61e-25	3.74e-32
GDF10	-3.29705	2.57e-25	3.9e-32
CFAP52	-3.28811	9.23e-06	3.92e-32
SCGB3A1	-3.28552	4.14e-10	3.99e-32
HP	-3.28399	5.24e-16	4.04e-32
LRRC71	-3.28374	0.00954214	4.12e-32
MYH15	-3.28064	1.2e-31	4.23e-32
UNC45B	-3.27877	3.63e-14	4.38e-32
ADRA1A	-3.27534	1.23e-20	4.45e-32
LINC01697	-3.27206	2.78e-17	4.8e-32
TSPAN8	-3.27158	4.38e-19	4.87e-32
CASC1	-3.267	1.84e-36	5.24e-32
LINC01482	-3.26625	6.81e-10	5.83e-32
FXYD1	-3.26404	3.01e-28	5.93e-32
CHI3L2	-3.26101	3.62e-32	6.02e-32
LRRC46	-3.25999	1.22e-06	7.27e-32
FMO9P	-3.2592	7.7e-21	7.77e-32
PLEKHS1	-3.25917	7.63e-17	8.32e-32
CROCC2	-3.25842	0.0149371	9.19e-32
ECRG4	-3.25702	1.28e-19	9.43e-32
LMOD3	-3.25661	1.07e-13	9.43e-32
OBSCN	-3.25531	4.1e-48	9.61e-32
TRIM63	-3.2553	1.5e-13	1.06e-31
PRR32	-3.25361	4.05e-11	1.13e-31
TIMP4	-3.25323	1.06e-39	1.34e-31
ECT2L	-3.25067	1.08e-27	1.4e-31
LRRC31	-3.25054	1.06e-10	1.43e-31
KRT32	-3.24586	2.68e-30	1.47e-31
SNORD116-12	-3.24159	3.28e-07	1.5e-31
XIRP2	-3.24084	1.33e-08	1.56e-31
SPDEF	-3.23915	1.23e-17	1.56e-31
EEF1A2	-3.23768	9.31e-20	1.71e-31
DYNLRB2	-3.23201	1.27e-06	1.92e-31
SLC25A4	-3.2293	9.25e-63	2.03e-31
DUPD1	-3.22748	6.22e-11	2.05e-31
TCHHL1	-3.22429	0.0137914	2.09e-31
FALEC	-3.22252	1.24e-31	2.13e-31
HPGD	-3.2214	1.26e-33	2.21e-31
B3GALT1	-3.21724	3.11e-20	2.39e-31
MYPN	-3.21111	1.04e-12	2.79e-31
ASB4	-3.20999	1.85e-19	3.01e-31
MYOM2	-3.2095	5.6e-24	3.02e-31
TNMD	-3.20701	4.13e-09	3.04e-31
SMTNL2	-3.20336	3.63e-17	3.13e-31
DUSP26	-3.20276	4.82e-16	3.17e-31
CADM2	-3.20254	4.67e-23	3.46e-31
PABPC1L2B	-3.20149	3.34e-05	3.53e-31
RGS22	-3.20148	8.99e-30	3.67e-31
PADI2	-3.19983	1.31e-24	3.77e-31
GPT	-3.19978	5.42e-45	3.94e-31
SCGB1A1	-3.19857	2.42e-10	4.43e-31
RMST	-3.19582	7.49e-11	4.55e-31
APOBEC2	-3.19296	5.23e-13	4.82e-31
HEPACAM2	-3.1862	3.43e-15	4.88e-31
KRT79	-3.18336	1.23e-06	4.97e-31
LAMB4	-3.18158	2.72e-25	4.99e-31
HHATL	-3.17562	2.32e-10	5.02e-31
VGLL2	-3.17381	1.4e-11	5.47e-31
TMEM232	-3.17291	4.14e-55	5.49e-31
NPY1R	-3.17159	1.78e-22	8.01e-31
YIPF7	-3.17152	3.24e-12	8.9e-31
RIIAD1	-3.17104	3.06e-17	1.05e-30
SLC25A34	-3.17012	1.66e-37	1.13e-30
BPIFB2	-3.16929	1.11e-05	1.18e-30
CCL14	-3.16889	2.96e-30	1.18e-30
LOC101927692	-3.16777	1.06e-19	1.19e-30
TFF1	-3.16747	3.88e-08	1.24e-30
DIO2-AS1	-3.16689	6.17e-16	1.27e-30
TNNT3	-3.16562	3.92e-15	1.47e-30
TRPV6	-3.16162	3.15e-23	1.76e-30
MYADML2	-3.16095	4.04e-14	1.79e-30
MSMB	-3.16065	5.22e-06	1.88e-30
EMP1	-3.16018	7.93e-75	1.96e-30
LRRC10B	-3.15211	1.94e-28	1.97e-30
SLC46A2	-3.15122	1.31e-37	1.99e-30
FGF6	-3.14943	1.85e-09	2.05e-30
TMEM238L	-3.14935	6.48e-19	2.05e-30
CEACAM7	-3.14793	2.78e-14	2.08e-30
TMEM229A	-3.14695	4.46e-10	2.14e-30
ANGPTL7	-3.14522	2.89e-17	2.27e-30
RPTN	-3.14474	1.23e-14	2.36e-30
PKIA	-3.14421	2.26e-31	2.41e-30
HSD17B13	-3.14259	1.91e-50	2.72e-30
SBK3	-3.13976	4.96e-07	2.86e-30
PPP1R3C	-3.1342	6.74e-31	3.43e-30
SNX31	-3.13368	3.76e-21	3.64e-30
SLN	-3.13293	2.47e-11	3.65e-30
DCDC2B	-3.13242	0.00034775	4.23e-30
SGCA	-3.13006	6.35e-18	4.31e-30
GPR101	-3.12921	2.02e-10	4.78e-30
LINC01996	-3.12811	1.38e-11	4.79e-30
RORC	-3.12786	9.75e-38	4.84e-30
SPINK5	-3.12126	1.21e-26	4.85e-30
TNNT1	-3.11815	7.26e-24	4.89e-30
GALNT16	-3.11697	1.79e-29	5.18e-30
MUSTN1	-3.11326	7.79e-13	5.61e-30
PLEKHB1	-3.11161	3.44e-39	5.61e-30
AMY2A	-3.1073	0.00425845	5.79e-30
SYNPO2L	-3.10719	1.46e-17	5.95e-30
TCEAL2	-3.10302	1.26e-18	6.47e-30
ELANE	-3.09986	1.55e-27	6.54e-30
KCNA7	-3.09464	2.81e-21	6.75e-30
PCDHA12	-3.09296	1.4e-10	7.05e-30
LOC107105282	-3.08411	8.12e-11	7.08e-30
FABP3	-3.08342	7.51e-30	7.24e-30
FRMPD2	-3.08304	4.34e-17	7.52e-30
CA10	-3.08008	2.03e-12	7.61e-30
FOXI1	-3.07844	8.76e-09	7.67e-30
FAM47E-STBD1	-3.07634	9.83e-19	7.87e-30
FUT6	-3.07061	2.84e-19	8.9e-30
GDF5	-3.06673	1.64e-24	1.03e-29
RGN	-3.06606	2.12e-44	1.06e-29
NKAIN3	-3.06482	2.17e-14	1.16e-29
RNF186	-3.06414	7.77e-07	1.19e-29
DLG2	-3.05988	1.06e-47	1.21e-29
CYP3A5	-3.05741	2.78e-32	1.22e-29
VWA5B1	-3.05693	9.2e-21	1.23e-29
MYBPC2	-3.05599	9.44e-12	1.35e-29
DLGAP1-AS5	-3.05162	2.65e-08	1.37e-29
SLC34A2	-3.05059	5.89e-12	1.4e-29
LINC01913	-3.04476	4.54e-09	1.42e-29
SMIM31	-3.04247	2.81e-08	1.53e-29
SCIN	-3.02945	4.87e-33	1.54e-29
ZP2	-3.02931	4.94e-16	1.64e-29
FRZB	-3.02701	6.02e-37	1.69e-29
KLHL31	-3.02694	4.61e-29	1.7e-29
UCP3	-3.02607	3.41e-31	1.7e-29
NPY2R	-3.01978	6.1e-09	1.81e-29
FXYD4	-3.0163	1.91e-16	1.84e-29
C8orf34-AS1	-3.01515	2.56e-11	1.95e-29
HRC	-3.01367	4.98e-15	1.95e-29
LINC01395	-3.01333	2.54e-26	1.95e-29
MT1JP	-3.00838	9.3e-18	1.99e-29
PRG4	-3.00735	1.41e-23	2.07e-29
CCDC60	-3.00634	3.03e-11	2.07e-29
CAV3	-3.00274	2.85e-09	2.07e-29
PPP1R9A	-3.00262	6.33e-19	2.14e-29
TCN1	-3.00115	6.8e-17	2.18e-29
NWD1	-3.0011	1.46e-23	2.51e-29
TFAP2B	-2.99983	7.84e-09	2.54e-29
CGNL1	-2.9983	5.68e-37	2.56e-29
UPK1A	-2.99623	1.47e-13	2.66e-29
HSD52	-2.99492	3.76e-19	2.71e-29
TCTEX1D4	-2.98888	6.66e-19	2.91e-29
SGCG	-2.98845	5.63e-15	3.08e-29
TRIM55	-2.9881	4.77e-16	3.13e-29
CLDN10-AS1	-2.98623	8.48e-09	3.15e-29
ART3	-2.98183	2.43e-19	3.17e-29
RSPH10B2	-2.98159	0.00553526	3.38e-29
SERPINB11	-2.97985	1.26e-13	3.83e-29
VEGFD	-2.97378	5.06e-28	3.85e-29
LOC101928844	-2.973	1.94e-23	3.98e-29
PLCXD3	-2.96995	3.34e-19	4.02e-29
CHRDL1	-2.96985	1.22e-16	4.1e-29
PFKFB1	-2.96874	9.17e-63	4.5e-29
CFAP100	-2.96375	0.0159911	4.58e-29
MAB21L4	-2.96332	3.18e-27	4.6e-29
CCDC170	-2.95993	2.29e-24	4.95e-29
LOC100129175	-2.95967	1.11e-09	4.96e-29
KRT222	-2.95857	1.17e-24	5.08e-29
STAC3	-2.95454	7.5e-18	5.17e-29
TPM2	-2.95393	1.41e-31	5.23e-29
RYR1	-2.95392	7.27e-30	5.51e-29
CCER2	-2.94764	5.98e-20	5.55e-29
CAMK2B	-2.94494	2.95e-21	5.75e-29
TMEM38A	-2.94291	1.72e-32	6e-29
MYOZ2	-2.94163	1.45e-09	6.32e-29
PPARGC1A	-2.93969	5.01e-26	6.71e-29
CARNS1	-2.93842	1.31e-36	6.96e-29
SIAH3	-2.93201	6.53e-16	7.83e-29
LINC01554	-2.9286	4.41e-23	8.28e-29
TMOD1	-2.92737	7.48e-21	8.82e-29
GABRA4	-2.92651	2.77e-10	8.89e-29
PPP1R1B	-2.92216	4.65e-12	9.48e-29
IL17D	-2.91978	7.58e-40	9.48e-29
PSCA	-2.91629	4.12e-18	9.86e-29
NDRG2	-2.91032	7.51e-60	1.08e-28
CYP2A13	-2.90992	9.49e-08	1.08e-28
SAA2	-2.90888	6.74e-21	1.09e-28
KBTBD12	-2.90811	1.38e-11	1.17e-28
MRGPRE	-2.90473	1.2e-15	1.17e-28
NRG3	-2.90281	2.15e-16	1.29e-28
SORBS2	-2.89982	7.5e-38	1.3e-28
CFAP61	-2.89955	5.19e-32	1.47e-28
HBB	-2.89937	1.56e-20	1.47e-28
ABCA8	-2.89935	1.21e-24	1.49e-28
ADPRHL1	-2.89888	9.59e-41	1.5e-28
CACNG6	-2.89683	5.5e-11	1.58e-28
CRYM	-2.89047	4.37e-22	1.62e-28
SEC14L5	-2.88969	2.44e-36	1.64e-28
DYDC2	-2.88815	1.22e-07	1.73e-28
NR3C2	-2.88791	4.88e-26	1.81e-28
RNASE8	-2.88007	2.22e-07	1.89e-28
CAND2	-2.88003	4.18e-29	2.05e-28
TMC5	-2.87883	4.11e-20	2.07e-28
AMOT	-2.87688	2.83e-24	2.17e-28
ARHGAP36	-2.87575	5.46e-13	2.42e-28
CFAP73	-2.87386	3.52e-22	2.51e-28
PRKAA2	-2.87374	8.11e-20	2.51e-28
CHAD	-2.87205	3.36e-23	2.65e-28
DUSP27	-2.87142	2.48e-09	2.66e-28
CLVS2	-2.87071	4.29e-11	2.97e-28
KIAA1324	-2.87014	3.29e-19	3e-28
IDI2-AS1	-2.86992	1.05e-37	3.07e-28
SLC4A4	-2.86781	2.67e-22	3.18e-28
MLIP	-2.86638	1.45e-26	3.3e-28
MYF6	-2.86242	5.74e-08	3.47e-28
FAM41C	-2.86013	4.68e-09	3.47e-28
MYZAP	-2.85885	1.13e-36	3.92e-28
HMGCLL1	-2.85697	5.21e-17	4.04e-28
LHFPL3-AS1	-2.85646	6.41e-07	4.06e-28
NIPSNAP3B	-2.85621	1.93e-42	4.15e-28
COQ8A	-2.85599	2.05e-48	4.38e-28
CA4	-2.85379	1.54e-13	4.56e-28
CDH20	-2.85272	1.6e-26	4.66e-28
C7	-2.85161	4.75e-13	4.79e-28
PRSS27	-2.85156	5.38e-23	5.42e-28
B3GNT6	-2.8429	2.36e-10	5.57e-28
CAMK2A	-2.83959	2.98e-21	6.09e-28
TTC25	-2.83941	0.0116139	6.35e-28
SCEL	-2.83879	5.38e-24	6.62e-28
LOC100653233	-2.83626	1.67e-09	6.78e-28
TRIM54	-2.83596	3.45e-11	7.98e-28
MYO18B	-2.83427	4.68e-13	8.69e-28
RHCG	-2.83327	1.13e-18	8.9e-28
KLF15	-2.83226	7.69e-26	9.13e-28
SCARA5	-2.82859	5.72e-24	9.35e-28
LINC01954	-2.82106	1.15e-15	1e-27
PROKR2	-2.81992	5.27e-05	1.05e-27
WDR63	-2.81703	6.8e-35	1.08e-27
HOPX	-2.81495	1.95e-28	1.08e-27
LOC100132813	-2.81483	3.63e-15	1.12e-27
SORBS1	-2.81401	2.24e-40	1.13e-27
NEU4	-2.81342	3.67e-19	1.14e-27
LINC02502	-2.81163	4.01e-11	1.18e-27
NMRK2	-2.80993	8.89e-08	1.27e-27
CYP2B7P	-2.80992	1.11e-13	1.29e-27
PLAC9	-2.80665	4.63e-38	1.32e-27
DES	-2.80361	1.85e-09	1.33e-27
DEPTOR	-2.80273	6.24e-38	1.45e-27
ANKRD23	-2.79991	7.9e-27	1.47e-27
IL13	-2.79652	4.59e-16	1.48e-27
GPR26	-2.79131	0.000657992	1.48e-27
DDIT4L	-2.78745	4.75e-14	1.52e-27
GNA14	-2.78552	3e-52	1.54e-27
LOC105372038	-2.78546	1.06e-09	1.57e-27
HSPB7	-2.78268	1.6e-11	1.57e-27
KIAA0408	-2.7816	1.24e-13	1.59e-27
SLC44A4	-2.77913	6.72e-16	1.66e-27
TNNI1	-2.77845	1.01e-13	1.71e-27
ODF4	-2.77747	2.1e-15	1.71e-27
RBM24	-2.77386	9.87e-16	1.76e-27
MAP1LC3C	-2.7735	2.78e-31	1.8e-27
PLPP7	-2.77242	1.08e-27	1.81e-27
GGTA1P	-2.76978	6.99e-48	1.88e-27
ACKR1	-2.76747	3e-25	1.96e-27
FAM3B	-2.76529	5.31e-13	2.09e-27
FGF10	-2.76516	1.53e-15	2.3e-27
DNAH7	-2.76514	8.07e-29	2.4e-27
TREH	-2.76239	1.28e-21	2.42e-27
PABPC1L2A	-2.76096	0.00107338	2.43e-27
CDHR3	-2.76046	1.39e-05	2.48e-27
OR7E47P	-2.75632	2.4e-21	2.55e-27
ANK2	-2.75205	2.63e-30	2.65e-27
LINC01778	-2.75117	1.15e-16	2.78e-27
APOD	-2.75098	2.25e-24	2.91e-27
COBL	-2.7488	2.19e-26	2.98e-27
ADAMTS9-AS1	-2.74753	3.53e-26	3.05e-27
LINC01634	-2.74734	7.85e-19	3.14e-27
SMPX	-2.74604	3.14e-08	3.2e-27
SPTB	-2.74381	1.1e-16	3.29e-27
HCN1	-2.74286	1.54e-08	3.35e-27
RERGL	-2.74239	3.69e-19	3.45e-27
SLC28A1	-2.7416	1.09e-22	3.55e-27
LOC643711	-2.74145	2.59e-09	3.71e-27
GPD1L	-2.73896	3.99e-76	3.89e-27
LOC101929106	-2.73872	3.75e-09	3.93e-27
CLDN10	-2.73722	2.17e-10	3.96e-27
KLHL34	-2.73565	5.67e-14	4.34e-27
SAXO2	-2.73561	8.4e-05	4.46e-27
BCL2L15	-2.73537	1.19e-21	4.5e-27
LINC01798	-2.73279	1.1e-30	4.69e-27
LOC101927972	-2.7312	3.15e-16	4.76e-27
PRB2	-2.72562	5.66e-13	4.99e-27
LOC105371267	-2.7213	3.57e-23	5.15e-27
FYB2	-2.72018	4.28e-14	5.55e-27
KCNT1	-2.71696	4.4e-20	5.67e-27
LGALS12	-2.7153	8.1e-17	5.67e-27
PDE6A	-2.7122	1.88e-23	5.77e-27
POPDC2	-2.71093	2.61e-34	5.93e-27
TOX3	-2.71007	7.31e-09	6.13e-27
C10orf90	-2.70819	4.01e-15	6.4e-27
FTLP10	-2.7066	4.32e-09	6.45e-27
FMO6P	-2.7031	2.48e-09	6.72e-27
PLP1	-2.70175	2.46e-15	6.93e-27
LOC107986321	-2.70041	0.000137222	7.3e-27
SH2D1B	-2.69997	2.31e-23	7.42e-27
SCN2B	-2.69959	9.52e-24	8.08e-27
WDR86-AS1	-2.69886	2.18e-24	8.15e-27
ALDH1L1	-2.69779	9.38e-17	8.54e-27
TMPRSS11BNL	-2.69723	3.41e-09	8.81e-27
TECRL	-2.6964	2.18e-12	9.14e-27
SELENBP1	-2.69288	1.89e-33	9.17e-27
CA8	-2.69221	7.25e-18	9.34e-27
FLNC	-2.69034	9.84e-17	9.99e-27
CCDC17	-2.67842	0.00313141	1.09e-26
TTR	-2.67541	2.14e-07	1.14e-26
TFF3	-2.67392	2.12e-10	1.16e-26
MYLK4	-2.67292	1.57e-38	1.24e-26
C5orf46	-2.67282	1.89e-17	1.24e-26
PEG3	-2.67044	1.47e-18	1.27e-26
GCNT3	-2.66431	3.37e-20	1.37e-26
LINC00492	-2.66089	1.08e-18	1.39e-26
LINC00681	-2.65997	0.00976458	1.45e-26
PMEL	-2.65554	3.62e-42	1.46e-26
CRYAB	-2.65515	1.52e-24	1.68e-26
ARPP21	-2.6494	2.83e-07	1.69e-26
LMOD1	-2.64558	4.27e-35	1.83e-26
SHOX	-2.64404	2.31e-06	1.87e-26
PPP1R27	-2.64319	1.49e-10	1.9e-26
CAPN9	-2.6416	1.2e-13	1.91e-26
CNMD	-2.64154	1.17e-05	1.96e-26
SYNM	-2.64085	1.7e-34	2.03e-26
MFSD6L	-2.63942	9.2e-18	2.16e-26
CAPN5	-2.63905	4.76e-49	2.3e-26
CEACAM1	-2.63813	2.07e-30	2.3e-26
CFAP161	-2.63677	0.00860853	2.44e-26
LCN8	-2.6346	1.48e-08	2.45e-26
TJP3	-2.6294	2.83e-20	2.64e-26
SLURP1	-2.62907	2.28e-11	2.94e-26
ANKRD2	-2.62747	3.89e-17	2.95e-26
CCDC173	-2.62704	2.62e-30	3.35e-26
SLC26A4	-2.62508	1.09e-24	3.52e-26
CLCN1	-2.62037	1.97e-27	3.63e-26
C2orf88	-2.61844	1.21e-47	3.81e-26
SLC6A4	-2.61833	2.14e-16	3.88e-26
ZMYND12	-2.61758	7.57e-40	3.97e-26
MUC5B	-2.61744	1.24e-06	4.35e-26
LINC01790	-2.6169	0.000287065	4.45e-26
KRT39	-2.60971	0.00266746	4.61e-26
LRRN4CL	-2.60892	9.13e-36	4.74e-26
TLX1NB	-2.60865	2.99e-11	4.81e-26
NME9	-2.6081	5.73e-39	4.81e-26
GBP6	-2.60373	2.66e-28	4.82e-26
KLK15	-2.60098	0.0186526	4.99e-26
ADGRA1	-2.6	3.75e-12	5e-26
SMIM5	-2.59816	1.03e-27	5.59e-26
ALOX15	-2.59669	2.06e-10	5.72e-26
GAS2L2	-2.5964	1.82e-10	6.25e-26
CLDN11	-2.59392	3.74e-29	6.34e-26
CILP	-2.59176	2.07e-14	6.68e-26
CEACAM5	-2.58542	6.22e-14	6.82e-26
PRKN	-2.58489	5.53e-32	7.15e-26
DNALI1	-2.58126	1.54e-30	7.5e-26
ADH1A	-2.58047	1.92e-15	7.65e-26
BPIFB6	-2.58009	0.000763052	8.21e-26
ADHFE1	-2.57773	9.68e-35	8.57e-26
MLANA	-2.57569	4.67e-37	8.84e-26
GPIHBP1	-2.57569	2.46e-26	9.09e-26
TBX15	-2.57526	5.59e-23	9.42e-26
SGK2	-2.57488	1.58e-18	9.59e-26
BEST3	-2.57441	3.45e-10	1.01e-25
SFTA2	-2.56968	2.89e-08	1.02e-25
AMY2B	-2.56914	3.99e-05	1.03e-25
PERM1	-2.566	1.63e-44	1.13e-25
NTRK3	-2.56594	1.48e-17	1.21e-25
CFD	-2.56394	1.15e-39	1.23e-25
SLC8A3	-2.56031	6.18e-15	1.27e-25
PGM5	-2.55415	3.08e-25	1.32e-25
BHLHA15	-2.55319	3.13e-18	1.33e-25
AZGP1P1	-2.54778	1.58e-08	1.36e-25
FGF10-AS1	-2.54655	2e-11	1.36e-25
KRT82	-2.54276	1.31e-07	1.47e-25
CXCR2	-2.54272	5.2e-23	1.47e-25
SERPINA3	-2.54081	1.37e-13	1.49e-25
CACNB4	-2.54044	2.52e-21	1.56e-25
ANKS1B	-2.53633	8.96e-32	1.58e-25
MMRN1	-2.53405	4.21e-20	1.59e-25
CACNG1	-2.53387	1.2e-07	1.6e-25
MYH4	-2.5295	4.22e-11	1.61e-25
ALOX12	-2.52935	1.49e-19	1.61e-25
RNF224	-2.52886	7.93e-25	1.77e-25
TTC39A-AS1	-2.52769	1.13e-21	1.81e-25
FA2H	-2.52566	8.22e-20	1.86e-25
FXYD2	-2.52421	8.84e-22	1.97e-25
SRGAP3-AS4	-2.52383	1.44e-09	1.99e-25
ACOX2	-2.52327	1.58e-46	2.05e-25
BCAS1	-2.52311	2.16e-19	2.12e-25
NBEA	-2.5225	9.63e-24	2.12e-25
LOC105375115	-2.52243	1.3e-05	2.14e-25
FAM71A	-2.52241	1.36e-07	2.14e-25
PAQR9	-2.52149	7.64e-10	2.16e-25
MYOM3	-2.5177	3.4e-17	2.19e-25
ITGB1BP2	-2.51723	2.32e-26	2.22e-25
STAC2	-2.51574	7.36e-41	2.31e-25
SEC14L3	-2.51518	3.59e-13	2.52e-25
ADGRF1	-2.5144	2.47e-16	2.55e-25
KCNC2	-2.51382	6.37e-05	2.58e-25
GALNTL6	-2.51368	2.9e-20	2.78e-25
C1orf127	-2.51325	6e-26	2.91e-25
DTNA	-2.51117	3.61e-20	3.11e-25
CPB1	-2.50945	3.97e-13	3.25e-25
SLC9A4	-2.50842	1.46e-09	3.48e-25
CMA1	-2.50798	2.03e-15	3.49e-25
DNASE1L3	-2.50761	4.07e-23	3.51e-25
ALPK3	-2.50445	4.06e-23	3.52e-25
MGP	-2.50225	1.14e-24	4.19e-25
CHRNA10	-2.49161	8.25e-44	4.22e-25
CABS1	-2.49103	3.06e-05	4.52e-25
GPX3	-2.48921	2.21e-29	4.55e-25
ATP13A4	-2.48857	2.68e-14	4.59e-25
RGS7BP	-2.48399	2.42e-12	4.6e-25
JPH2	-2.48395	5.4e-17	4.6e-25
HSPB2-C11orf52	-2.47981	3.67e-10	4.68e-25
LINC01091	-2.47854	8.17e-30	4.77e-25
AADAC	-2.47749	1.04e-10	4.88e-25
SLCO5A1	-2.47732	2.71e-20	4.92e-25
NOSTRIN	-2.4758	3.91e-78	4.99e-25
PPM1K-DT	-2.47506	3.77e-30	5.09e-25
KRT86	-2.47491	0.00279925	5.19e-25
PGM5-AS1	-2.47469	1.95e-09	5.2e-25
FAM3D-AS1	-2.47399	1.1e-14	5.4e-25
TMEM252	-2.47369	1.23e-14	5.68e-25
ATP12A	-2.47365	9.08e-11	5.8e-25
C15orf62	-2.47103	9.94e-31	5.84e-25
GSTA5	-2.47045	1.6e-05	5.87e-25
LOC105374205	-2.47001	1.24e-17	5.98e-25
PRR15L	-2.46931	5.42e-18	6.06e-25
CAP2	-2.46924	1e-31	6.37e-25
FAM189A2	-2.46864	4.82e-21	6.38e-25
VSIG8	-2.46772	2.88e-10	6.38e-25
KIF19	-2.46627	3.1e-29	6.38e-25
BMP3	-2.46619	1.19e-07	6.41e-25
CLDN17	-2.46122	2.04e-08	6.58e-25
EGF	-2.45996	1.63e-18	6.71e-25
RRAGD	-2.45969	1.28e-41	7.23e-25
LOC100506289	-2.4575	5.74e-15	7.24e-25
CDNF	-2.45737	6.06e-54	7.57e-25
LCN6	-2.45696	2.54e-19	7.59e-25
SMIM6	-2.45487	4.4e-20	7.73e-25
ENAM	-2.45393	1.43e-14	7.97e-25
SLITRK5	-2.45373	1.65e-11	8.51e-25
CCDC178	-2.45226	2.18e-22	8.61e-25
ZDHHC15	-2.45123	7.59e-20	8.83e-25
FCN2	-2.45056	6.25e-10	8.85e-25
ANK1	-2.45048	3.29e-20	8.85e-25
SCNN1B	-2.44656	7.14e-19	9.08e-25
TOGARAM2	-2.44532	1.75e-27	9.55e-25
LOC100130449	-2.44501	6.09e-18	9.61e-25
CAVIN4	-2.4441	1.13e-12	9.89e-25
ZNF710-AS1	-2.4439	3.58e-47	9.98e-25
NXPE1	-2.44309	2.5e-12	1.02e-24
LOC105370906	-2.44305	3.43e-08	1.03e-24
ACER1	-2.44262	5.61e-11	1.04e-24
ACBD3-AS1	-2.43756	1.12e-35	1.04e-24
GRB14	-2.43744	2.02e-18	1.06e-24
TMEM100	-2.43582	2.74e-21	1.07e-24
CYP1A2	-2.43366	2.93e-07	1.09e-24
LDLRAD4-AS1	-2.43125	8.21e-16	1.12e-24
GNG7	-2.43064	7.06e-35	1.2e-24
PKHD1L1	-2.42925	6.4e-16	1.26e-24
F10	-2.42609	8.21e-36	1.26e-24
PKNOX2	-2.42526	4.17e-20	1.27e-24
ENPP4	-2.42519	1.42e-25	1.27e-24
CNTFR	-2.42253	1.37e-14	1.29e-24
TLE2	-2.42049	6.44e-30	1.33e-24
CRACR2B	-2.41986	1.63e-27	1.35e-24
TRIM72	-2.41864	1.68e-10	1.41e-24
ELF5	-2.41783	1.12e-10	1.43e-24
GJC3	-2.41757	8.9e-18	1.45e-24
CFAP45	-2.4162	1.11e-20	1.45e-24
PLA2G2A	-2.41367	2.53e-09	1.46e-24
LINC01708	-2.41203	0.000474985	1.5e-24
NKAPL	-2.41103	1.46e-28	1.54e-24
PDE4DIP	-2.41099	6.39e-37	1.55e-24
SAMD5	-2.40778	3.38e-21	1.6e-24
KNCN	-2.40695	3.16e-05	1.62e-24
TRNP1	-2.40584	1.03e-33	1.68e-24
ASB16	-2.40451	1.21e-30	1.7e-24
ANXA9	-2.40379	4.31e-27	1.78e-24
DPF3	-2.40327	5.87e-30	1.82e-24
TMEM182	-2.40051	4.63e-41	1.84e-24
ZFY-AS1	-2.39896	8.17e-09	1.86e-24
SSTR1	-2.39712	2.52e-15	1.88e-24
GABRP	-2.39517	3.52e-09	1.98e-24
SRPK3	-2.39282	9.03e-17	2.02e-24
CAPS	-2.39265	6.19e-26	2.03e-24
SPNS2	-2.39248	3.68e-28	2.11e-24
LOC101928118	-2.392	1.58e-22	2.2e-24
KCNJ11	-2.38815	1.7e-19	2.24e-24
SCRG1	-2.38645	4.46e-13	2.31e-24
PCDHA13	-2.38202	5.28e-06	2.46e-24
LINC02549	-2.381	0.00631036	2.59e-24
AOX1	-2.37931	1.19e-25	2.75e-24
LINC02701	-2.37756	4.58e-17	2.85e-24
PAX9	-2.37527	7.54e-27	2.89e-24
ACACB	-2.37304	3.45e-38	2.89e-24
PPIL6	-2.37036	1.42e-38	3.24e-24
AGR2	-2.36981	5.79e-14	3.35e-24
AGFG2	-2.36826	5.89e-87	3.41e-24
LINC01266	-2.36806	5.95e-12	3.45e-24
LOC101928075	-2.36789	6.9e-17	3.64e-24
PPL	-2.36664	3.55e-31	3.68e-24
KLK13	-2.36445	4.56e-12	3.69e-24
MT4	-2.36129	0.000878704	3.72e-24
LINC01625	-2.36124	4.56e-17	3.86e-24
TMEM233	-2.36063	1.72e-22	3.96e-24
VIT	-2.35838	1.22e-16	4.18e-24
ATP1B4	-2.35705	2.87e-06	4.3e-24
LOC101929340	-2.35675	3.29e-46	4.33e-24
FAM57B	-2.35509	3.66e-13	4.63e-24
MAATS1	-2.35033	2.26e-11	4.96e-24
ERN2	-2.34919	1.3e-08	4.96e-24
LDHD	-2.34683	2.93e-32	5.09e-24
ASB18	-2.34652	1.79e-10	5.14e-24
SOX9-AS1	-2.34485	1.01e-21	5.21e-24
CYSRT1	-2.34456	3.03e-16	5.29e-24
HSPB2	-2.34381	8.7e-19	5.32e-24
STK33	-2.34065	2.61e-15	5.78e-24
PGM5P4-AS1	-2.34047	3.78e-11	5.91e-24
ASB14	-2.34029	9.31e-50	5.96e-24
LOC102725191	-2.33968	0.00395378	5.96e-24
PDLIM3	-2.33809	7.23e-14	6.02e-24
CFAP46	-2.337	8.3e-15	6.27e-24
ARHGEF38	-2.33689	9.52e-21	6.29e-24
CLU	-2.33338	1.56e-20	6.83e-24
CCDC63	-2.33258	3.4e-12	6.86e-24
SLC30A2	-2.3325	1.31e-14	6.88e-24
DPT	-2.33153	3.56e-19	7.09e-24
SEMA6C	-2.32914	2.09e-25	7.14e-24
MLPH	-2.32908	5.58e-20	7.38e-24
SORCS1	-2.32794	2.4e-14	7.44e-24
SCN1B	-2.32674	4.34e-22	7.56e-24
RBM20	-2.32505	3.47e-22	7.67e-24
NEK5	-2.32303	2.03e-51	7.76e-24
EPS8L3	-2.32145	0.00427546	7.84e-24
MEF2C-AS2	-2.32083	2.96e-07	8e-24
PDE4C	-2.32067	3.66e-18	8.25e-24
LRRC74B	-2.31918	0.000129352	8.4e-24
DKK4	-2.31872	9.48e-11	8.75e-24
MIMT1	-2.31382	1.52e-06	9.06e-24
ITM2A	-2.3131	1.52e-35	9.06e-24
BARX2	-2.31241	1.31e-24	9.23e-24
MAS1L	-2.3109	3.76e-09	9.44e-24
CTNND2	-2.3107	1.71e-13	9.5e-24
PLCB4	-2.30932	3.58e-17	9.5e-24
TMEM178A	-2.30817	1.92e-15	9.53e-24
MIR486-1	-2.3077	2.21e-06	9.54e-24
SAA2-SAA4	-2.30587	1.38e-12	9.63e-24
CYP21A2	-2.30465	4.96e-15	9.68e-24
SEMA3E	-2.30108	1.57e-09	9.77e-24
TACR1	-2.30086	2.16e-16	1.03e-23
UBXN10	-2.29992	2.98e-18	1.05e-23
OGN	-2.29935	4.49e-11	1.05e-23
LINC02036	-2.2974	2.57e-13	1.06e-23
GFRA1	-2.29269	1.11e-16	1.07e-23
CCL23	-2.29063	1.77e-22	1.11e-23
LEXM	-2.29029	1.7e-17	1.12e-23
ACHE	-2.28996	3.12e-17	1.12e-23
FRMPD1	-2.28926	6.68e-15	1.19e-23
SPINK7	-2.28918	1.8e-07	1.26e-23
LBX1	-2.28889	2.19e-07	1.3e-23
LYVE1	-2.28247	4.3e-25	1.3e-23
CLUL1	-2.28237	2.35e-13	1.32e-23
LRRC3B	-2.2817	7.19e-06	1.33e-23
ASB5	-2.27956	1e-05	1.42e-23
LRFN2	-2.27887	2.83e-15	1.46e-23
LOC107985194	-2.27856	6.21e-16	1.48e-23
TTLL10	-2.27724	9.66e-06	1.54e-23
KLB	-2.27697	1.87e-28	1.57e-23
OSR1	-2.27675	4.25e-21	1.7e-23
ALB	-2.27625	2.24e-10	1.74e-23
LIMCH1	-2.27334	1.24e-23	1.75e-23
GAPDHS	-2.27331	2.51e-10	1.78e-23
RCAN2	-2.27089	2.95e-28	1.87e-23
PHYH	-2.2689	5.71e-48	1.92e-23
CYP2B6	-2.26876	2.19e-07	2.03e-23
C4orf19	-2.26738	2.34e-13	2.05e-23
GDPD3	-2.26435	2.03e-20	2.09e-23
WDR78	-2.26431	8.59e-18	2.25e-23
MUC15	-2.26311	3.09e-15	2.29e-23
TEKT4	-2.25978	0.0174795	2.39e-23
C2orf50	-2.25778	6.64e-19	2.47e-23
ROPN1	-2.25635	3.61e-07	2.52e-23
FAM47E	-2.25596	8.49e-31	2.68e-23
PGPEP1L	-2.25557	8.62e-11	2.7e-23
LPL	-2.25468	3.17e-19	2.71e-23
CXCL17	-2.25448	1.01e-13	2.82e-23
TMEM56	-2.25	1.25e-19	2.92e-23
HSD11B2	-2.24859	1.31e-38	3.4e-23
LINC02395	-2.24828	5.41e-09	3.46e-23
ACADL	-2.24815	2.09e-10	3.6e-23
LHCGR	-2.24722	3.09e-08	3.6e-23
CTTNBP2	-2.24218	3.64e-15	3.66e-23
HMCN2	-2.23943	1.26e-17	3.7e-23
LONRF2	-2.23826	8.97e-11	3.8e-23
PPARG	-2.23748	2.84e-20	3.9e-23
CLVS1	-2.23561	3.52e-21	3.95e-23
FAM149A	-2.23549	1.4e-25	4.03e-23
XPNPEP2	-2.23413	1.61e-14	4.17e-23
GLP1R	-2.23386	9.49e-18	4.2e-23
ADSSL1	-2.23049	7.04e-29	4.35e-23
ADCY2	-2.23041	5.98e-12	4.36e-23
VIPR2	-2.22968	9.72e-15	4.37e-23
ADARB2-AS1	-2.22829	5.47e-08	4.37e-23
SYNPO2	-2.22706	9.58e-12	4.43e-23
A2ML1	-2.22431	1.17e-14	4.89e-23
MYH7B	-2.22307	2.92e-15	5.02e-23
LINC01269	-2.22261	2.74e-16	5.18e-23
CFL2	-2.2204	2.21e-38	5.26e-23
ARX	-2.22037	5.35e-12	5.4e-23
ARFGEF3	-2.21652	1.38e-15	5.45e-23
KCTD8	-2.21644	1.07e-08	5.72e-23
LSMEM1	-2.21613	1.52e-32	5.79e-23
ST6GALNAC1	-2.21209	2.23e-16	6.41e-23
SLC16A6	-2.21088	3.4e-29	6.45e-23
KCNA4	-2.20907	1.47e-07	6.46e-23
HPSE2	-2.20842	7.62e-11	6.51e-23
PART1	-2.20696	7.83e-14	6.58e-23
MYH11	-2.20683	4.12e-13	6.58e-23
VSIG10L	-2.20226	4.06e-17	6.61e-23
TMPRSS2	-2.20134	1.97e-10	6.75e-23
PZP	-2.2007	1.03e-17	6.95e-23
SPATA18	-2.20041	1.86e-34	7.11e-23
CAB39L	-2.199	9.68e-82	7.32e-23
PCDH20	-2.1955	7.06e-07	7.43e-23
C5orf66-AS1	-2.19526	3.34e-12	7.44e-23
NKX6-2	-2.19342	1.19e-09	7.44e-23
LRRIQ1	-2.19322	1.03e-07	7.81e-23
GLRB	-2.19178	5.58e-19	7.98e-23
IP6K3	-2.18846	1.25e-08	8.13e-23
CYP11A1	-2.18713	1.59e-10	8.4e-23
LINC02028	-2.1844	1.5e-13	8.52e-23
CSRP3	-2.18338	0.000102402	8.73e-23
SASH1	-2.1812	3.52e-36	8.83e-23
MT3	-2.18012	3.38e-08	8.99e-23
DLK1	-2.17826	9.36e-10	9.1e-23
LINC01101	-2.1776	5.8e-05	9.12e-23
C1QTNF9	-2.17612	7.02e-07	9.23e-23
SPEG	-2.17501	5.54e-23	9.23e-23
ENO4	-2.17406	3.29e-24	9.25e-23
RIMS1	-2.17228	1.96e-10	9.25e-23
FILIP1	-2.16952	5.46e-18	9.44e-23
COQ10A	-2.16893	6.66e-55	9.53e-23
PPP1R12B	-2.16852	1.63e-35	9.6e-23
SLCO4A1-AS1	-2.16736	3.2e-14	9.91e-23
PCDHAC1	-2.16627	5.53e-10	1.02e-22
CRAT	-2.16623	1.52e-27	1.05e-22
LINC01736	-2.16609	8.23e-09	1.08e-22
DMD	-2.16205	4e-22	1.21e-22
ACSS3	-2.16129	4.5e-21	1.22e-22
CDH26	-2.16078	1.26e-17	1.22e-22
BRINP1	-2.16012	1.08e-12	1.25e-22
AK7	-2.15799	1.8e-12	1.28e-22
ROPN1B	-2.15721	6.06e-11	1.37e-22
LOC101929592	-2.15698	5.13e-13	1.5e-22
MT1M	-2.15692	1.97e-17	1.51e-22
KCNJ13	-2.15516	2.81e-09	1.51e-22
CD200R1	-2.15472	4.09e-26	1.51e-22
LOC105371730	-2.1547	3.92e-29	1.59e-22
MPZ	-2.15411	2.09e-20	1.69e-22
ALAS2	-2.14949	0.00538264	1.7e-22
TTYH1	-2.14923	4.09e-21	1.76e-22
MYH13	-2.14644	3.15e-15	1.78e-22
CLCN4	-2.14322	9.65e-21	1.79e-22
TGFBR3	-2.14136	2e-25	1.81e-22
NUCB2	-2.1409	1.32e-85	1.84e-22
UGT3A1	-2.13955	5.03e-07	1.89e-22
INMT	-2.13901	1.04e-26	1.9e-22
ART4	-2.13738	8.1e-13	1.92e-22
MEF2C-AS1	-2.13348	6.17e-18	1.94e-22
CLDN8	-2.13257	8.43e-07	1.95e-22
DRD2	-2.13235	7.7e-13	1.98e-22
MGC27382	-2.13174	2.09e-10	1.99e-22
LINC01479	-2.13146	3.99e-09	2.01e-22
SPRR2F	-2.13083	3.86e-08	2.04e-22
LINC02188	-2.12972	2.23e-12	2.17e-22
LINC01886	-2.12832	1.91e-07	2.23e-22
FCER1A	-2.12607	2.43e-16	2.24e-22
KLHL32	-2.12468	4.07e-17	2.24e-22
PTGES3L	-2.12281	1.75e-25	2.34e-22
ACSM3	-2.11975	3.82e-27	2.38e-22
GCOM1	-2.119	3.55e-13	2.41e-22
ACSM5	-2.11343	9.32e-17	2.42e-22
ZNF106	-2.11222	3.19e-47	2.43e-22
ANXA1	-2.11208	8.89e-28	2.47e-22
PLEKHA6	-2.11099	2.82e-24	2.57e-22
C12orf74	-2.10956	2.17e-11	2.61e-22
LOC100509620	-2.1094	2.49e-07	2.62e-22
ASB2	-2.10895	8.37e-22	2.62e-22
ADAMTS9-AS2	-2.10876	1.74e-24	2.68e-22
RSPH9	-2.10875	8.94e-06	2.68e-22
MUC16	-2.10824	3.36e-09	2.71e-22
HLF	-2.10772	1.65e-14	2.74e-22
GLYATL2	-2.10682	8.63e-08	2.89e-22
PFKM	-2.10465	2.09e-50	2.89e-22
RAB9B	-2.10461	2.67e-18	2.9e-22
TMPRSS11A	-2.09977	3.39e-09	2.92e-22
DSG1-AS1	-2.09968	8.41e-15	3.08e-22
TRIM31	-2.09966	2.25e-06	3.17e-22
SHROOM3	-2.09854	4.4e-34	3.31e-22
WDR93	-2.09739	5.73e-15	3.32e-22
AARD	-2.09692	1.75e-08	3.48e-22
LOC102723701	-2.09461	4.79e-34	3.54e-22
KRT24	-2.09084	2.01e-05	3.55e-22
MLXIPL	-2.09035	1.81e-10	3.6e-22
SACS-AS1	-2.09016	2.2e-07	3.71e-22
SLC16A7	-2.08966	2.31e-22	3.73e-22
NOS1	-2.0865	7.7e-11	3.76e-22
DIO1	-2.07934	3.88e-18	3.83e-22
CCDC197	-2.07927	1.61e-08	3.83e-22
GMPR	-2.07851	4.39e-23	3.87e-22
TSPAN12	-2.07837	6.49e-24	3.91e-22
ADGRB3	-2.07674	2e-14	4.03e-22
ABI3BP	-2.07618	1.35e-14	4.22e-22
LINC02292	-2.07561	0.000577061	4.37e-22
FGF7	-2.07476	4.17e-15	4.37e-22
LINC01978	-2.0713	1.7e-15	4.5e-22
CACNB1	-2.07048	6.7e-19	4.62e-22
CEACAM6	-2.06861	2.24e-13	4.62e-22
NCCRP1	-2.06761	2.2e-13	4.72e-22
PTX3	-2.06713	3.39e-11	4.75e-22
METTL7A	-2.06595	1e-25	4.8e-22
PRSS42P	-2.06527	1.92e-10	4.87e-22
RSPO3	-2.06421	1.82e-17	5.27e-22
PLAC8	-2.06371	1.24e-10	5.29e-22
FRMD3	-2.06366	1.07e-28	5.3e-22
TMEM61	-2.06349	9.19e-19	5.39e-22
PNPLA7	-2.06191	1.81e-34	5.48e-22
PAIP2B	-2.06004	2.81e-46	5.52e-22
PWAR5	-2.05978	2.76e-15	5.71e-22
LYPD2	-2.05934	7.35e-08	5.83e-22
TLX1	-2.05856	2.42e-05	5.96e-22
RAPSN	-2.05835	3.12e-10	6.22e-22
CYP4F12	-2.05687	7.9e-11	6.69e-22
MDH1B	-2.0551	0.00458637	6.69e-22
CDH19	-2.05447	1.89e-08	6.74e-22
HSPB8	-2.05444	5.19e-22	7.04e-22
KLHL30	-2.05258	2.77e-10	7.08e-22
MYOD1	-2.05129	5.1e-05	7.09e-22
REN	-2.05124	1.11e-09	7.15e-22
LOC101928303	-2.05108	1.16e-12	7.31e-22
CRCT1	-2.05074	1.72e-08	7.32e-22
KHDRBS2	-2.04965	6.04e-10	7.37e-22
ITLN1	-2.04928	3.34e-12	7.37e-22
RNF157	-2.04848	1.21e-20	7.68e-22
KLHDC8A	-2.04806	5.16e-10	7.89e-22
MUC4	-2.04755	9.33e-08	8.44e-22
RNF180	-2.04686	6.51e-29	8.58e-22
LINC01563	-2.04663	1.32e-06	8.66e-22
NHLRC4	-2.04549	1.28e-23	8.71e-22
RSPO1	-2.04142	1.75e-13	8.78e-22
FAXDC2	-2.0414	1.18e-28	8.85e-22
GP9	-2.03837	3.76e-07	9.09e-22
LOC101928436	-2.03787	1.75e-08	9.15e-22
MAP6	-2.03732	1.64e-16	9.44e-22
LINC00940	-2.03673	1.46e-05	9.47e-22
SSTR5-AS1	-2.03353	5.1e-07	9.56e-22
ACPP	-2.03349	1.02e-21	9.64e-22
DGAT2	-2.03022	5.56e-21	9.87e-22
FLG-AS1	-2.02994	7.57e-17	1.02e-21
MITF	-2.0299	9.86e-29	1.04e-21
NEXN	-2.02941	2.1e-16	1.06e-21
PRKAG3	-2.02939	7.74e-07	1.1e-21
LINC01600	-2.02927	1.68e-21	1.11e-21
LINC00327	-2.02913	1.34e-19	1.11e-21
LINC02243	-2.02851	8.62e-16	1.12e-21
LINC00593	-2.02757	8.75e-19	1.12e-21
TMEM211	-2.02668	1.51e-05	1.15e-21
TRMT9B	-2.02653	4.09e-16	1.16e-21
LINC01352	-2.0238	3.17e-15	1.18e-21
ZSCAN1	-2.0206	1.08e-11	1.25e-21
RNF150	-2.01951	1.31e-12	1.25e-21
KAT2B	-2.01869	1.15e-44	1.28e-21
AIF1L	-2.01553	4.7e-23	1.32e-21
PIRT	-2.01472	1.54e-07	1.33e-21
DCX	-2.0146	1.45e-08	1.36e-21
ZIM2	-2.01424	5.71e-06	1.4e-21
SLC22A16	-2.01397	6.75e-12	1.41e-21
MMP27	-2.01346	3.69e-11	1.42e-21
GRIK3	-2.01341	4.06e-08	1.47e-21
GNMT	-2.01242	3.46e-26	1.47e-21
FAM13C	-2.01224	2.33e-18	1.51e-21
LINC02347	-2.01184	2.06e-06	1.52e-21
PRR29	-2.0116	5.39e-28	1.52e-21
RIMS4	-2.00986	5.94e-07	1.53e-21
FUT3	-2.00627	7.63e-17	1.55e-21
IL1RN	-2.00619	1.87e-18	1.57e-21
MIR5188	-2.00518	5.49e-12	1.57e-21
KCNIP2	-2.00499	3.67e-27	1.57e-21
C1orf105	-2.004	1.2e-06	1.57e-21
SPAG8	-2.00242	1.46e-21	1.63e-21
CHST4	-2.00022	4.06e-07	1.63e-21
BHMT2	-1.99986	2.22e-21	1.73e-21
CRTAC1	-1.99744	2.12e-10	1.79e-21
GLYATL1	-1.9974	6.13e-11	1.95e-21
RHBG	-1.99726	4.8e-13	1.98e-21
MIA	-1.99644	5.78e-07	1.98e-21
JSRP1	-1.99574	9.79e-13	2.02e-21
IGSF10	-1.99519	2.56e-10	2.05e-21
ANKRD1	-1.99432	5.55e-06	2.06e-21
MGLL	-1.99319	1.64e-32	2.1e-21
LOC101929331	-1.99157	2.95e-18	2.15e-21
PCARE	-1.99085	1.75e-13	2.16e-21
SMC2-AS1	-1.9906	2.61e-15	2.22e-21
ZNF844	-1.99045	7.44e-25	2.27e-21
GADD45G	-1.99005	4.09e-21	2.32e-21
KRT23	-1.98871	6.03e-12	2.47e-21
CORO6	-1.98711	1.41e-11	2.5e-21
SLC1A7	-1.98703	6.85e-12	2.51e-21
USP13	-1.98585	2.91e-29	2.55e-21
HS3ST1	-1.98518	5.49e-25	2.62e-21
TPRG1	-1.98389	1.92e-22	2.68e-21
TTC9	-1.98276	4.48e-22	2.71e-21
PRUNE2	-1.98269	6.01e-10	2.72e-21
PITX3	-1.98138	1.38e-15	2.72e-21
COL25A1	-1.97915	5.16e-11	2.84e-21
GAMT	-1.97909	1.86e-23	2.85e-21
BOLL	-1.97782	4.46e-15	2.86e-21
CAPN6	-1.97661	6.99e-07	2.88e-21
RAET1E	-1.97656	1.58e-14	2.94e-21
ANKRD20A4	-1.97234	2.5e-08	2.96e-21
APOL5	-1.97213	3.02e-12	2.97e-21
JPH1	-1.96945	1.91e-21	2.98e-21
SHISA3	-1.96873	5.18e-07	3.14e-21
KIT	-1.96847	1.96e-18	3.14e-21
RARRES1	-1.96742	6.05e-13	3.17e-21
AR	-1.96553	4.22e-13	3.25e-21
RBPMS-AS1	-1.96303	7.79e-16	3.35e-21
MAGEE2	-1.957	6.45e-08	3.41e-21
GGT6	-1.95595	4.24e-19	3.42e-21
LOC100506682	-1.95572	1.58e-06	3.47e-21
DOK5	-1.95446	8.48e-16	3.47e-21
LINC00160	-1.95267	1.21e-12	3.54e-21
LOC105373958	-1.95086	1.69e-10	3.58e-21
SFRP1	-1.94916	2.49e-10	3.82e-21
LINC01854	-1.94752	0.00115998	4.13e-21
LINC00689	-1.94628	4.82e-08	4.24e-21
EMX2OS	-1.94418	7.54e-14	4.39e-21
ABHD1	-1.9438	3.44e-18	4.45e-21
TAAR1	-1.94365	0.00262069	4.59e-21
CLDN3	-1.94138	1.5e-05	4.63e-21
ZNF835	-1.94122	2.15e-21	4.73e-21
LINC01726	-1.94079	0.000174703	4.75e-21
C8orf34	-1.94034	5.77e-17	4.76e-21
AQP12B	-1.93762	0.000106488	4.84e-21
WDR49	-1.93459	1.48e-06	4.91e-21
RAB17	-1.93446	1.82e-16	4.93e-21
LOC100128531	-1.93399	1.73e-13	4.98e-21
BTC	-1.93277	1.6e-14	5.07e-21
PTGIS	-1.932	1.02e-09	5.11e-21
TUB-AS1	-1.93142	0.0048268	5.15e-21
CTSG	-1.9285	1.94e-12	5.17e-21
IKZF2	-1.92722	2.33e-25	5.2e-21
CYP2E1	-1.92706	1.36e-10	5.32e-21
ADGRG2	-1.92419	3.6e-13	5.35e-21
EPM2A	-1.92375	7.97e-50	5.42e-21
ZNF728	-1.92299	8.83e-07	5.46e-21
TNFRSF11A	-1.92145	3.72e-30	5.51e-21
ANKRD35	-1.92028	1.3e-15	5.74e-21
CCDC78	-1.91947	0.00867091	5.92e-21
DNAH3	-1.9189	3.47e-09	6.09e-21
DPP6	-1.91881	3.5e-09	6.28e-21
ECM1	-1.91304	4.35e-18	6.3e-21
KCNA5	-1.91155	1.17e-12	6.46e-21
PTGFR	-1.91054	4.54e-13	6.5e-21
FYCO1	-1.90978	1.11e-43	6.56e-21
TMPRSS11E	-1.90958	1.03e-09	6.61e-21
MROH9	-1.90951	0.00947943	6.73e-21
C4B	-1.90859	1.79e-13	6.73e-21
SLC19A3	-1.90707	2.98e-18	6.75e-21
GAS2	-1.90461	1.62e-12	6.75e-21
PLA2G2E	-1.90418	0.00131487	6.97e-21
SCN11A	-1.90227	1.88e-14	6.99e-21
EHF	-1.90059	2.07e-20	7e-21
NR4A1	-1.89782	2.18e-17	7e-21
AGT	-1.89564	7.55e-11	7.34e-21
MAPT-IT1	-1.89558	9.33e-06	7.37e-21
GDF7	-1.89317	1.46e-17	7.44e-21
FMO5	-1.89175	4.44e-31	7.49e-21
CYP2C18	-1.89151	6.68e-11	7.86e-21
TTC16	-1.89086	0.000340719	7.86e-21
ADAMTS8	-1.89038	8.53e-14	8.18e-21
TEKT3	-1.88995	2.35e-15	8.22e-21
CX3CR1	-1.88945	9.7e-17	8.97e-21
ID4	-1.8887	3.01e-23	8.97e-21
NFIX	-1.8877	1.54e-50	9.08e-21
ADGRD1	-1.88531	1.72e-15	9.12e-21
RNF225	-1.88369	3.83e-12	9.19e-21
IYD	-1.88236	1.1e-07	9.36e-21
LOC105370024	-1.88222	4.77e-09	9.53e-21
OXGR1	-1.87874	4e-09	9.56e-21
ACTG2	-1.8787	2.41e-12	9.81e-21
PTPRT	-1.87484	1e-05	1.01e-20
CCL2	-1.87143	3.31e-19	1.01e-20
KCNAB1	-1.86947	9.68e-47	1.03e-20
CDH15	-1.86863	7.2e-09	1.04e-20
LOC102724163	-1.86572	6.58e-22	1.04e-20
ATP6V1G3	-1.86535	0.0155616	1.09e-20
RSPH10B	-1.86502	9.41e-07	1.1e-20
C10orf142	-1.86343	2.72e-08	1.11e-20
CPEB3	-1.86336	6.46e-47	1.11e-20
ZNF677	-1.86215	7.99e-21	1.14e-20
SHISA9	-1.86112	3.56e-06	1.32e-20
CA1	-1.85964	2.53e-11	1.34e-20
ZCWPW2	-1.85875	6.22e-50	1.37e-20
ZNF385D	-1.85849	7.05e-17	1.39e-20
TM7SF2	-1.85847	3.1e-19	1.41e-20
CLCNKA	-1.85842	1.45e-07	1.45e-20
CDO1	-1.85805	4.87e-10	1.53e-20
LRRC20	-1.85789	6.51e-28	1.55e-20
LOC400710	-1.85694	1.32e-12	1.58e-20
KLK12	-1.85644	3.31e-07	1.62e-20
RHAG	-1.85558	6.69e-06	1.65e-20
ADCY8	-1.8554	4.66e-05	1.66e-20
AFDN-DT	-1.85475	2.49e-31	1.71e-20
FADS6	-1.85054	1.51e-07	1.76e-20
LRRC43	-1.84717	4.42e-16	1.85e-20
BOC	-1.84648	2.01e-24	1.91e-20
RASD1	-1.84511	6.42e-17	2e-20
CYP2A6	-1.84425	4.05e-05	2.04e-20
SAA4	-1.84284	3.13e-08	2.08e-20
CYP1A1	-1.84238	0.00019223	2.1e-20
EPDR1	-1.84174	6.51e-15	2.13e-20
MAB21L3	-1.83987	2.89e-12	2.15e-20
CSTB	-1.83833	4.34e-19	2.18e-20
MEF2C	-1.83595	2.83e-13	2.19e-20
RSPH14	-1.83512	0.000234556	2.21e-20
SPATA6	-1.8338	3.95e-26	2.26e-20
IL26	-1.83378	1.08e-10	2.27e-20
AMELY	-1.8336	0.00659193	2.28e-20
MFAP4	-1.83318	1.66e-12	2.35e-20
KRT7	-1.83225	1.98e-07	2.46e-20
CDH22	-1.83076	2.49e-07	2.48e-20
TMEM220-AS1	-1.83039	7.77e-23	2.52e-20
LOC101928731	-1.82929	7.57e-11	2.54e-20
LINC02237	-1.82854	0.00353835	2.59e-20
APOF	-1.8274	9.17e-09	2.64e-20
NDNF	-1.82609	2.55e-11	2.72e-20
GULP1	-1.82599	5.91e-15	2.72e-20
LOC101927392	-1.82553	5.05e-05	2.79e-20
FGF18	-1.82372	5.92e-13	2.81e-20
SHISA4	-1.82314	3.09e-18	2.86e-20
SLC26A9	-1.82127	5.46e-09	2.88e-20
PTGDS	-1.82103	9.9e-13	2.91e-20
KCNRG	-1.8191	3.03e-29	2.93e-20
CLDN4	-1.81809	1.09e-18	2.97e-20
PCP4L1	-1.8171	8.76e-09	2.98e-20
PPP1R36	-1.8164	2.54e-23	2.99e-20
ZNF727	-1.81522	3.29e-08	3.09e-20
LMO7DN	-1.81519	3.01e-10	3.09e-20
EYA2	-1.81484	4.86e-10	3.11e-20
PLCL1	-1.81413	4.96e-23	3.14e-20
FHIT	-1.81379	1.11e-24	3.16e-20
LMO7DN-IT1	-1.81322	4.7e-07	3.18e-20
EPS8L1	-1.81317	4.27e-18	3.23e-20
UGT1A8	-1.8117	0.00220372	3.23e-20
KCNK5	-1.81146	4.95e-25	3.3e-20
C16orf71	-1.81132	5.62e-25	3.32e-20
POLR2F	-1.81066	1.85e-12	3.36e-20
ATP6V1C2	-1.80986	5.59e-13	3.46e-20
KRT34	-1.8097	5.9e-09	3.53e-20
PCDHAC2	-1.80941	3.56e-09	3.54e-20
CLDN23	-1.80933	7.83e-28	3.56e-20
NEURL1	-1.80799	1.68e-11	3.56e-20
LOC100506098	-1.80665	2.08e-16	3.56e-20
STBD1	-1.80445	2.69e-30	3.9e-20
LRRC4C	-1.80393	5e-10	4.01e-20
GADD45B	-1.80052	1.22e-33	4.03e-20
ARHGAP20	-1.79978	5.36e-17	4.08e-20
LINC02412	-1.7981	1.72e-05	4.19e-20
ZBTB20-AS4	-1.79736	4.65e-09	4.22e-20
ALDH3A1	-1.79671	8.68e-08	4.27e-20
IL19	-1.79614	1.26e-06	4.28e-20
FNDC4	-1.79559	5.1e-25	4.33e-20
DRC3	-1.7951	3.77e-19	4.61e-20
ATP8A1	-1.79476	4.41e-20	4.67e-20
IGDCC4	-1.7944	1.07e-15	5.09e-20
BIN1	-1.79389	6.25e-18	5.12e-20
TGM1	-1.7933	5.39e-10	5.17e-20
PRSS3	-1.7917	2.05e-07	5.32e-20
TCEA3	-1.79167	9.01e-20	5.33e-20
GJD4	-1.7914	4.08e-10	5.42e-20
GALNT12	-1.79081	1e-20	5.61e-20
ART5	-1.79056	2.72e-08	5.62e-20
FOXI2	-1.79011	1.82e-05	5.63e-20
DNER	-1.7897	2.75e-09	5.65e-20
AKAP6	-1.78908	1.71e-11	5.75e-20
CCDC181	-1.78837	6.96e-11	5.99e-20
ADH7	-1.78518	9.98e-07	6e-20
ENTPD8	-1.78487	4.37e-06	6.01e-20
LOC105372028	-1.78268	0.000181323	6.01e-20
THSD4	-1.78192	3.82e-26	6.01e-20
LPIN1	-1.78085	8.4e-46	6.33e-20
LOC441239	-1.78064	2.57e-10	6.5e-20
LINC01587	-1.77975	6.25e-11	6.51e-20
FOSB	-1.77897	2.28e-11	6.51e-20
KCNC1	-1.77853	1.81e-08	6.57e-20
ACSM1	-1.77834	6.71e-20	6.58e-20
ATOH8	-1.77812	1.14e-12	6.62e-20
IL12A	-1.7774	1.52e-13	6.66e-20
ARSH	-1.777	7.16e-12	6.66e-20
CAVIN2	-1.77666	9.1e-15	6.72e-20
ATP1A4	-1.77615	1.7e-12	6.73e-20
SLC13A4	-1.77607	1.93e-13	6.84e-20
LMO7	-1.77541	1.97e-24	6.95e-20
RTN2	-1.77502	2.13e-28	6.95e-20
FAIM2	-1.77496	5.65e-16	7.03e-20
AADACL2	-1.77467	5.36e-05	7.09e-20
MAMDC2	-1.77355	1.1e-11	7.3e-20
NR1H4	-1.77153	3.26e-06	7.39e-20
TSPAN1	-1.77103	8.07e-10	7.45e-20
MUC20	-1.77055	4.16e-09	7.77e-20
DCDC1	-1.77015	0.000659602	7.91e-20
HGD	-1.7694	7.87e-09	7.93e-20
LINC01082	-1.76771	0.00563599	8.07e-20
LOC101929497	-1.76716	5.18e-06	8.24e-20
LOC101928307	-1.76609	3.99e-07	8.56e-20
INSYN1	-1.76501	3.26e-12	8.69e-20
ENPP5	-1.76452	1.36e-08	8.75e-20
KIAA1211L	-1.76248	4.56e-20	8.77e-20
LINC00472	-1.76149	1.13e-11	8.8e-20
HLX-AS1	-1.76072	1.62e-07	8.9e-20
CHDH	-1.75859	3.8e-10	9.53e-20
CNFN	-1.75719	3.37e-08	9.53e-20
SGSM1	-1.75717	4.05e-12	9.89e-20
MKRN2OS	-1.75713	1.06e-20	1.03e-19
LINC02560	-1.75701	1.07e-11	1.05e-19
UPK3B	-1.75618	9.12e-10	1.07e-19
ACADSB	-1.75596	7.95e-35	1.08e-19
LOC100287036	-1.75574	1.42e-20	1.1e-19
PHYHIP	-1.75344	5.77e-12	1.1e-19
CSTA	-1.75244	7.9e-13	1.12e-19
LOC100506885	-1.75052	3.13e-12	1.18e-19
EPB41L4A	-1.75046	1.37e-19	1.23e-19
FHL5	-1.75011	4.66e-14	1.26e-19
CCDC110	-1.74821	3.69e-16	1.27e-19
SNHG28	-1.74786	2.44e-06	1.28e-19
SLC51B	-1.74662	1.36e-17	1.28e-19
GATM	-1.74568	3.33e-16	1.29e-19
GPT2	-1.74529	1.21e-31	1.33e-19
PANTR1	-1.74375	0.000150768	1.33e-19
MACC1	-1.74373	9.83e-16	1.34e-19
KCNE1B	-1.74363	3.09e-06	1.34e-19
LOC101929798	-1.74137	3.48e-08	1.37e-19
GPRASP1	-1.74122	4.42e-27	1.41e-19
OTOP2	-1.74046	9.39e-09	1.46e-19
SVIL	-1.73843	2.26e-39	1.46e-19
ATP7B	-1.73783	1.28e-23	1.46e-19
KCNA1	-1.73581	7.57e-06	1.47e-19
OR7E91P	-1.73546	6.15e-12	1.54e-19
WNK4	-1.73327	2.86e-10	1.61e-19
ESRRB	-1.73263	1.35e-07	1.69e-19
MYH1	-1.73092	6.32e-05	1.71e-19
PDE11A	-1.72975	1.83e-06	1.76e-19
DDO	-1.72931	4.7e-15	1.81e-19
EPCAM-DT	-1.72909	9.37e-13	1.82e-19
BICDL2	-1.72895	2.33e-16	1.87e-19
ZNF295-AS1	-1.72858	4.27e-22	1.89e-19
AGXT	-1.72763	3.11e-06	1.89e-19
IL33	-1.72718	3.25e-09	1.91e-19
DIRAS1	-1.72628	2.22e-09	1.96e-19
PRPH2	-1.72625	3.85e-14	1.96e-19
SYNGR1	-1.72611	1.63e-19	2.03e-19
SEMA3G	-1.7258	6.12e-22	2.07e-19
MYL10	-1.72538	1.78e-05	2.08e-19
ABCA9	-1.72481	3.3e-15	2.09e-19
CXCL12	-1.72376	1.58e-13	2.15e-19
SYT8	-1.72279	2.18e-08	2.16e-19
C4BPB	-1.72201	6.97e-09	2.17e-19
CLIC3	-1.72198	6.36e-11	2.18e-19
RNF222	-1.72163	5.11e-08	2.19e-19
RIC3	-1.72148	5.44e-10	2.2e-19
NNAT	-1.72076	1.32e-15	2.22e-19
CHPT1	-1.71994	2.67e-19	2.22e-19
LRRC37A11P	-1.71857	9.77e-13	2.26e-19
C11orf52	-1.71795	5.93e-12	2.38e-19
SAMD13	-1.71757	9.83e-21	2.38e-19
LINC00619	-1.7158	5.22e-12	2.39e-19
EFHC2	-1.71568	2.8e-11	2.43e-19
GAS7	-1.71452	2.94e-20	2.43e-19
KNDC1	-1.71371	2.19e-09	2.45e-19
TMEM143	-1.71305	1.07e-42	2.48e-19
LOR	-1.71188	3.55e-06	2.5e-19
PLEKHA7	-1.71176	1.25e-23	2.5e-19
MAML3	-1.70905	3.11e-27	2.51e-19
PTPRN2	-1.70841	2.4e-17	2.7e-19
DEGS2	-1.70802	1.02e-10	2.72e-19
EFCAB6	-1.7061	1.35e-17	2.72e-19
GALNT5	-1.70466	4.44e-10	2.74e-19
NOVA1	-1.70349	3.8e-11	2.77e-19
SAA1	-1.7028	1.67e-08	2.8e-19
SOD3	-1.70229	4.42e-21	2.8e-19
SLC1A1	-1.70214	1.31e-12	2.82e-19
LINC01840	-1.70153	6.38e-05	2.83e-19
PLBD1-AS1	-1.70145	9.82e-18	2.86e-19
FRY	-1.70126	8.81e-18	2.97e-19
LINC00836	-1.70117	0.00139737	3e-19
DHRS9	-1.6988	9.08e-10	3.06e-19
DEFB1	-1.69786	3.51e-09	3.1e-19
LOC105375680	-1.69764	5.5e-05	3.1e-19
EPHX2	-1.69756	2.66e-21	3.12e-19
SLC13A5	-1.6972	1.13e-07	3.13e-19
CCDC85A	-1.69692	2.04e-09	3.16e-19
ZNF626	-1.69657	3.38e-16	3.18e-19
RGS9BP	-1.69582	1.71e-16	3.22e-19
FEM1A	-1.69491	1.09e-42	3.29e-19
BEND7	-1.69447	5.85e-13	3.32e-19
FAM174B	-1.69328	1.61e-26	3.32e-19
LOC388780	-1.69233	1.13e-11	3.41e-19
GC	-1.69216	0.00727452	3.44e-19
PPM1L	-1.69188	1.42e-19	3.44e-19
CYP2J2	-1.69123	7.41e-21	3.44e-19
SNORD116-24	-1.69095	3.43e-07	3.51e-19
EVPL	-1.68868	8.94e-21	3.54e-19
LRG1	-1.68774	3.6e-12	3.74e-19
FAM110D	-1.68708	2.29e-23	3.75e-19
HID1	-1.68633	2.02e-15	3.8e-19
AGTR2	-1.68621	0.00117983	3.87e-19
CGN	-1.68575	9.98e-17	4.11e-19
OCLN	-1.68562	9.63e-15	4.13e-19
ND5	-1.68552	6.83e-29	4.13e-19
EMCN	-1.68523	2.41e-23	4.15e-19
AGL	-1.68472	1.95e-44	4.15e-19
ARHGEF38-IT1	-1.68311	0.00668149	4.17e-19
CASQ2	-1.68274	2.46e-05	4.17e-19
AMHR2	-1.6827	2.55e-09	4.43e-19
LINC01549	-1.68177	1.36e-06	4.5e-19
SMIM2-IT1	-1.68125	3.95e-06	4.5e-19
SOWAHA	-1.68094	2.98e-08	4.54e-19
RERG	-1.68029	6.02e-12	4.67e-19
RETREG1	-1.68019	1.19e-14	4.67e-19
RELN	-1.6795	2.83e-10	4.93e-19
WFDC21P	-1.67867	2.45e-09	4.97e-19
CLIC6	-1.67801	1.04e-09	5.02e-19
CMTM5	-1.67659	5.36e-07	5.12e-19
CA13	-1.6748	8.22e-23	5.12e-19
G6PC2	-1.67415	0.00276105	5.23e-19
SULT1C3	-1.67382	0.00564456	5.23e-19
NCBP2L	-1.67341	2.65e-06	5.31e-19
C2CD4B	-1.67308	3.94e-12	5.43e-19
CLYBL	-1.67172	2.64e-32	5.52e-19
RIBC1	-1.67098	8.88e-10	5.62e-19
ZNF415	-1.67094	3.33e-15	5.63e-19
MYOCD	-1.67041	5.67e-11	5.84e-19
CNGA3	-1.66864	3.87e-08	5.91e-19
BNIPL	-1.66807	1.91e-13	5.95e-19
FHL3	-1.66796	4.6e-30	6.09e-19
KCNQ4	-1.66776	1.57e-14	6.1e-19
IQCD	-1.66774	2.96e-23	6.11e-19
CCN5	-1.66733	1.26e-07	6.23e-19
INSYN2B	-1.66451	1.55e-07	6.23e-19
MYO5C	-1.66316	6.82e-13	6.29e-19
EXPH5	-1.66227	5.79e-24	6.3e-19
SMARCD3	-1.66048	6.37e-21	6.6e-19
VWA2	-1.65911	4.32e-13	6.6e-19
VTCN1	-1.65875	1.4e-05	6.66e-19
ARHGAP6	-1.65832	8.29e-22	6.96e-19
LINC02621	-1.65595	2.21e-06	7.03e-19
RXRG	-1.65566	1.31e-07	7.17e-19
SLC15A2	-1.65556	2.23e-15	7.19e-19
WFIKKN2	-1.6553	7.79e-05	7.71e-19
BSPRY	-1.65487	5.17e-14	7.8e-19
TMEM125	-1.65484	5.33e-15	7.87e-19
EXOC1L	-1.65235	0.000150629	7.94e-19
KRT74	-1.6514	0.000186862	7.95e-19
TPM1	-1.64988	5.02e-17	7.99e-19
UBL3	-1.64987	6.65e-62	8.02e-19
LOC286178	-1.64842	4.75e-07	8.45e-19
CSRNP1	-1.64724	2.63e-33	8.73e-19
CRHR2	-1.6464	6.36e-10	8.85e-19
SLITRK4	-1.64509	7.7e-08	8.92e-19
MMEL1	-1.64479	6.27e-13	8.95e-19
AQP2	-1.64478	3.4e-08	9.04e-19
APOC3	-1.6446	0.00498364	9.1e-19
NKX3-1	-1.64382	2.68e-16	9.17e-19
LIFR-AS1	-1.64365	1.57e-12	9.18e-19
MEOX2	-1.64333	7.52e-11	9.3e-19
LINC01805	-1.64323	9.02e-09	9.3e-19
EPB41L4A-DT	-1.64099	1.85e-22	9.31e-19
DMGDH	-1.64097	7.07e-27	9.34e-19
SOX17	-1.6399	1.66e-21	9.4e-19
KALRN	-1.63966	1.51e-23	9.43e-19
FAM135B	-1.63958	3.4e-08	9.44e-19
SCNN1A	-1.63951	2.73e-13	9.61e-19
APOH	-1.63934	1.04e-06	9.61e-19
NSUN7	-1.63885	3.61e-11	9.86e-19
CCDC148	-1.63824	4.76e-16	9.96e-19
AOC3	-1.63679	8.71e-17	1.03e-18
SNTB1	-1.63666	2.51e-24	1.03e-18
GNE	-1.63466	8.56e-24	1.04e-18
GS1-24F4.2	-1.63357	1.65e-06	1.09e-18
CH25H	-1.6324	3.57e-13	1.09e-18
LOC101929066	-1.63093	1.56e-30	1.1e-18
ND6	-1.63088	9.9e-26	1.12e-18
GMDS	-1.63066	2.33e-48	1.13e-18
KCNJ12	-1.62998	1.23e-09	1.13e-18
GLYAT	-1.62921	4.32e-06	1.17e-18
LCN2	-1.62831	7.4e-09	1.21e-18
TGM5	-1.62739	1.63e-10	1.24e-18
NR4A3	-1.62701	3.54e-12	1.25e-18
ATP2A3	-1.62683	1.52e-19	1.25e-18
CYP4Z2P	-1.62595	0.000246911	1.26e-18
CEBPB-AS1	-1.62554	7.81e-26	1.27e-18
NAALADL2	-1.62339	8.02e-11	1.32e-18
EYA1	-1.62242	2.44e-07	1.37e-18
RHOU	-1.6209	3.03e-22	1.39e-18
SERPINB13	-1.61879	8.16e-10	1.41e-18
SMAD9	-1.61864	4.17e-19	1.47e-18
LNX1	-1.61853	9.54e-23	1.48e-18
BEX4	-1.61661	2.68e-16	1.51e-18
ZNF471	-1.6149	3.65e-12	1.57e-18
TMEFF2	-1.61356	2.09e-09	1.58e-18
SLPI	-1.61223	4.68e-10	1.61e-18
ZNF582-AS1	-1.61185	9.65e-17	1.68e-18
KLHL14	-1.61112	3.03e-08	1.7e-18
FAM124A	-1.61038	1.12e-20	1.73e-18
CDH10	-1.60885	0.000177936	1.74e-18
CCDC89	-1.60778	0.000199296	1.74e-18
TMPRSS5	-1.60702	1.42e-11	1.79e-18
SPAG17	-1.6068	1.8e-09	1.83e-18
PDGFD	-1.60638	6.32e-14	1.84e-18
B3GNT7	-1.60537	1.93e-15	1.85e-18
UCKL1-AS1	-1.60532	4.07e-19	1.86e-18
MRO	-1.60423	5.36e-14	1.87e-18
GNAT3	-1.60409	0.00732887	1.88e-18
C4A	-1.60307	6.31e-11	1.88e-18
SLC25A23	-1.60284	2.37e-25	1.89e-18
NAT8L	-1.60196	8.72e-09	1.89e-18
TEC	-1.60018	2.87e-24	1.9e-18
FAM25A	-1.59811	1.76e-05	1.9e-18
SPNS3	-1.59804	1.4e-17	1.93e-18
IQGAP2	-1.59691	2.51e-14	1.94e-18
PODN	-1.59528	4.92e-10	1.96e-18
ZFP2	-1.59497	8.58e-24	1.97e-18
FOS	-1.59483	1.09e-14	1.98e-18
SERPINB1	-1.59451	3.1e-18	2.02e-18
ZNF648	-1.59383	0.000606927	2.03e-18
ND1	-1.59283	3.19e-31	2.05e-18
MIR770	-1.5927	0.00356417	2.06e-18
PIK3C2G	-1.59224	6.83e-07	2.08e-18
CYSLTR1	-1.59216	1.01e-16	2.15e-18
P2RX6	-1.59154	1.02e-09	2.16e-18
RPS6KA6	-1.59129	2.77e-05	2.18e-18
PTGER3	-1.59091	7.65e-11	2.25e-18
PSD2	-1.59061	4.38e-10	2.26e-18
IL34	-1.58984	1.49e-13	2.32e-18
LOC100506388	-1.5894	2.32e-07	2.51e-18
LRRK2	-1.58898	1.76e-15	2.52e-18
RBP4	-1.58818	3.2e-05	2.53e-18
ABLIM2	-1.58769	2.08e-15	2.57e-18
PCDH1	-1.58422	8.9e-24	2.58e-18
BLNK	-1.58413	3.34e-18	2.64e-18
ARHGEF10L	-1.58287	3.69e-39	2.64e-18
KCNMB1	-1.58285	1.16e-21	2.66e-18
CRISP1	-1.58254	0.00491916	2.71e-18
LIPI	-1.58211	2.54e-08	2.75e-18
RAI1-AS1	-1.58197	1.34e-06	2.76e-18
B3GALT5	-1.58109	5.09e-05	2.81e-18
LOC101927911	-1.57932	1.02e-09	2.84e-18
TCP11L2	-1.57871	1.05e-29	2.87e-18
MPC1	-1.57861	3.77e-55	2.89e-18
ETFDH	-1.57801	2.26e-67	2.9e-18
ZPBP	-1.57732	0.000671834	2.91e-18
CYP4X1	-1.57712	1.38e-07	2.92e-18
SHISA6	-1.57689	5.27e-06	2.94e-18
ETV1	-1.57679	1.28e-12	2.99e-18
ATP10B	-1.57621	5.76e-09	3.04e-18
ICA1	-1.57553	3.35e-13	3.04e-18
TNFRSF19	-1.57415	2.21e-14	3.07e-18
MAOB	-1.57382	6.74e-08	3.09e-18
SYN2	-1.57363	2.44e-06	3.1e-18
ZFP36	-1.57359	1.94e-22	3.12e-18
RNASE4	-1.5727	6.52e-22	3.14e-18
ZNF503-AS1	-1.57251	1.75e-07	3.15e-18
MAGI1	-1.57192	9.24e-42	3.17e-18
ITGA7	-1.57095	7.1e-11	3.24e-18
ABO	-1.5707	1.14e-07	3.25e-18
ZBTB47	-1.57013	5.65e-30	3.25e-18
PIP5K1B	-1.56981	1.47e-09	3.26e-18
LOC100507477	-1.5675	0.0121412	3.32e-18
TMEM45B	-1.56701	6.75e-09	3.37e-18
CCL16	-1.56692	6.32e-09	3.5e-18
MYO5B	-1.56569	5.75e-19	3.67e-18
CFAP70	-1.56539	3.58e-18	3.69e-18
STMN2	-1.5652	1.6e-05	3.71e-18
DUSP5	-1.56446	1.36e-21	3.78e-18
REG4	-1.56408	1.87e-05	3.93e-18
CRB1	-1.56352	3.37e-07	4.11e-18
RBM47	-1.56273	4.98e-33	4.11e-18
LINC02653	-1.56091	0.000953028	4.11e-18
HNF1B	-1.56077	0.0180285	4.12e-18
ZNF676	-1.55908	5.2e-06	4.14e-18
OMP	-1.55906	6.09e-08	4.2e-18
BMX	-1.55904	3.15e-13	4.24e-18
ABCC6P1	-1.55889	1.19e-05	4.51e-18
NTF3	-1.55806	1.55e-08	4.71e-18
PMP2	-1.55792	5e-05	4.72e-18
ANKRD31	-1.55717	4.28e-08	4.77e-18
FUT2	-1.55647	2.86e-18	4.89e-18
LHFPL1	-1.55568	5.54e-06	4.91e-18
LEPR	-1.55564	2.68e-18	4.97e-18
CXXC4	-1.55557	3.78e-09	5.02e-18
EGR3	-1.55485	1.23e-12	5.11e-18
ACADM	-1.55462	1.44e-50	5.17e-18
RPRML	-1.55324	1.91e-06	5.19e-18
SLC12A2	-1.5529	4.29e-28	5.22e-18
MANSC1	-1.55162	1.91e-16	5.34e-18
ZNF185	-1.55132	9.35e-17	5.37e-18
TP53INP2	-1.55067	5.98e-21	5.45e-18
TMEM139	-1.55029	1.56e-06	5.49e-18
SCHIP1	-1.54987	4.1e-17	5.54e-18
SERPINB2	-1.54859	8.19e-08	5.56e-18
USP2	-1.54823	1.73e-10	5.72e-18
TNS1	-1.54816	4.07e-19	5.76e-18
SLC25A25	-1.54727	2.73e-26	5.83e-18
EGR1	-1.5455	8.46e-18	6.03e-18
PITX1	-1.5447	4.59e-18	6.07e-18
TTC21A	-1.54444	8.51e-28	6.16e-18
ADAMTS19	-1.54408	2.77e-07	6.24e-18
SYNC	-1.54375	4.07e-13	6.36e-18
PDE1A	-1.54355	4.13e-18	6.38e-18
SVOPL	-1.54352	1.89e-06	6.42e-18
SPRR2A	-1.54259	2.54e-06	6.46e-18
INMT-MINDY4	-1.54155	0.000693863	6.48e-18
CHST6	-1.54114	2.99e-09	6.54e-18
PLAAT3	-1.54095	4.09e-11	6.69e-18
S100A8	-1.54041	5.47e-08	6.8e-18
CCDC141	-1.5392	1.33e-09	6.87e-18
CCDC158	-1.53886	3.36e-11	6.9e-18
PLAC9P1	-1.53815	6.35e-05	7.02e-18
SLC44A3	-1.53718	7.05e-25	7.04e-18
LMCD1	-1.53693	2.24e-18	7.04e-18
VWA5A	-1.53683	9.94e-23	7.07e-18
LRMP	-1.53608	2.74e-09	7.07e-18
LOC100505841	-1.53541	0.0020669	7.1e-18
FOXC1	-1.53468	1.26e-21	7.22e-18
UNC13C	-1.53347	2.68e-05	7.24e-18
AGTR1	-1.53181	1.61e-06	7.52e-18
OR7E14P	-1.53115	6.17e-10	7.54e-18
LOC101928009	-1.53071	5.46e-08	7.63e-18
ANKRD20A1	-1.52958	8.79e-07	7.8e-18
GRIA4	-1.52912	8.92e-12	7.8e-18
MPP7	-1.52882	1.08e-20	7.98e-18
LINC02172	-1.52854	1.4e-06	7.98e-18
IL17A	-1.52849	3.41e-05	8.09e-18
CYP21A1P	-1.52823	1.08e-08	8.1e-18
LINC02526	-1.52455	9.06e-05	8.17e-18
DAGLA	-1.52391	2.84e-15	8.21e-18
GASK1A	-1.5232	1.46e-09	8.29e-18
SULT2B1	-1.52029	2.79e-09	8.36e-18
ADAMTSL3	-1.51992	4.06e-08	8.44e-18
SVIP	-1.51875	5.21e-11	8.47e-18
EYA4	-1.5184	6.68e-07	8.69e-18
AQP3	-1.51698	2.58e-09	8.7e-18
ALDH3B1	-1.51697	7.09e-20	8.81e-18
ZNF135	-1.51496	3.66e-12	8.81e-18
ERICH5	-1.51392	4.9e-06	9.2e-18
SOBP	-1.51338	2.72e-13	9.25e-18
GLOD5	-1.51289	3.64e-06	9.26e-18
PTN	-1.51284	8.87e-08	9.44e-18
LOC102724804	-1.51202	7.37e-05	9.52e-18
GPRC5B	-1.51146	1.26e-13	9.56e-18
IL6	-1.51093	1.99e-07	1e-17
LOC101927495	-1.50945	2.57e-06	1.04e-17
ALDH1A1	-1.50827	7.75e-06	1.06e-17
IL17RD	-1.50695	1.38e-18	1.06e-17
MINDY1	-1.50662	3.7e-42	1.08e-17
GCKR	-1.5043	5.59e-11	1.09e-17
LINC02308	-1.50336	3.22e-05	1.11e-17
CTD-2270F17.1	-1.50245	0.000481417	1.15e-17
ZSCAN18	-1.50108	1.59e-12	1.15e-17
ASPG	-1.50086	2.26e-08	1.19e-17
EIF4EBP3	-1.50044	3.92e-19	1.22e-17
PGR	-1.50038	6.42e-07	1.25e-17
LINC00968	-1.50004	1.88e-10	1.25e-17
SMPD3	-1.49848	4.11e-10	1.25e-17
RRAD	-1.49757	2.56e-07	1.26e-17
DKFZp779M0652	-1.49614	6.56e-10	1.27e-17
C1orf116	-1.49583	1.99e-17	1.28e-17
LOC100130451	-1.49513	2.48e-06	1.29e-17
TFCP2L1	-1.49512	6.38e-14	1.34e-17
UGT2B7	-1.49442	0.000226509	1.34e-17
TUBA8	-1.49388	3.37e-13	1.4e-17
SPTBN4	-1.49256	6.48e-12	1.43e-17
RYR3	-1.49254	7.65e-09	1.44e-17
LOC105379194	-1.49199	1.33e-06	1.47e-17
DIO2	-1.49164	4.21e-12	1.52e-17
TEX101	-1.49117	1.76e-06	1.56e-17
LINC00278	-1.49092	0.000166732	1.62e-17
DOCK8-AS1	-1.49087	1.51e-12	1.62e-17
CHL1	-1.49082	3.88e-06	1.62e-17
PCDHB1	-1.49027	9.18e-05	1.62e-17
WDFY3-AS2	-1.48997	7.91e-33	1.63e-17
GRHL3	-1.48955	3.78e-12	1.65e-17
PPM1H	-1.48934	1.74e-09	1.65e-17
PTPN5	-1.48856	5.89e-09	1.67e-17
MALL	-1.48839	8.86e-13	1.67e-17
TCEAL7	-1.48694	2.91e-11	1.71e-17
TTLL9	-1.48694	1.96e-12	1.72e-17
JCHAIN	-1.48676	5.24e-06	1.81e-17
NAMA	-1.48669	8.29e-08	1.82e-17
SORT1	-1.48581	3.24e-25	1.84e-17
C1orf115	-1.48545	1.17e-15	1.9e-17
CNN1	-1.48518	5.23e-10	1.94e-17
CPNE4	-1.48434	1.29e-05	1.95e-17
MIR4530	-1.4843	8.89e-05	1.96e-17
ACAT1	-1.48427	1.88e-41	1.96e-17
ELF3	-1.48346	1.05e-10	1.96e-17
RNASE13	-1.48251	2.63e-05	1.99e-17
SLC27A2	-1.48225	1.32e-08	2e-17
DACH1	-1.48161	1.72e-09	2.02e-17
NEBL	-1.48147	8.31e-16	2.05e-17
LVRN	-1.48097	1.58e-07	2.09e-17
PCK1	-1.48026	9.43e-06	2.1e-17
SNORD116-1	-1.47889	0.00553975	2.12e-17
RAI2	-1.47756	3.34e-13	2.13e-17
KRT28	-1.47692	2.45e-07	2.13e-17
ANKRD20A2	-1.47595	2.97e-05	2.24e-17
SNORD116-2	-1.47544	0.00139867	2.24e-17
C15orf48	-1.4743	2.85e-12	2.28e-17
TMEM220	-1.47403	9.73e-21	2.3e-17
RALYL	-1.47381	0.00144444	2.3e-17
PAQR9-AS1	-1.47338	0.000264045	2.31e-17
NKX2-3	-1.47304	0.000633395	2.36e-17
LRRTM3	-1.47291	0.00812239	2.4e-17
SLC37A1	-1.47211	5.59e-23	2.4e-17
CA7	-1.47115	8.5e-05	2.43e-17
ANKRD30BL	-1.47113	0.00294533	2.44e-17
ZDHHC22	-1.47003	0.000301993	2.52e-17
CCDC69	-1.46934	4.48e-20	2.54e-17
LOC100506474	-1.46905	5.96e-09	2.56e-17
NXPH3	-1.46873	6.29e-13	2.58e-17
HPR	-1.46799	0.00168869	2.58e-17
ME3	-1.46757	3.52e-16	2.69e-17
TSPAN6	-1.46713	2.88e-33	2.71e-17
ZNF853	-1.46385	4.24e-10	2.71e-17
GALR1	-1.46334	1.51e-06	2.75e-17
PIH1D2	-1.46321	4.88e-29	2.76e-17
MPV17L	-1.4628	1.07e-07	2.8e-17
MTRNR2L10	-1.46248	0.00128398	2.83e-17
SIX1	-1.46213	5.9e-16	2.88e-17
ROBO2	-1.46114	2.55e-06	2.88e-17
RND1	-1.46084	6.63e-12	2.95e-17
TMEM200C	-1.4598	1.11e-06	2.96e-17
IL17B	-1.45914	4.99e-11	3.04e-17
ALDH6A1	-1.45913	1.29e-29	3.06e-17
CRACR2A	-1.45785	2.1e-14	3.08e-17
N4BP3	-1.45775	2.75e-25	3.09e-17
S100A14	-1.45635	7.6e-14	3.11e-17
CRHBP	-1.45604	3.39e-08	3.15e-17
TTTY14	-1.45568	0.000297789	3.15e-17
SNED1	-1.45507	4.2e-12	3.18e-17
EHD3	-1.45473	2.28e-23	3.35e-17
FAM221B	-1.45428	1.18e-05	3.36e-17
HRCT1	-1.45367	3.83e-08	3.37e-17
SLC26A2	-1.4535	2.85e-21	3.41e-17
LINC01140	-1.45323	1.76e-13	3.41e-17
SLC5A9	-1.4525	6.05e-12	3.47e-17
SYTL5	-1.45076	3.84e-06	3.53e-17
SERTM1	-1.44999	0.00504812	3.54e-17
RAB11FIP1	-1.44943	1.05e-12	3.54e-17
APBB1	-1.44879	1.32e-17	3.63e-17
LRP1B	-1.44863	1.67e-05	3.9e-17
PDZRN4	-1.44826	3.41e-06	3.98e-17
CACNA2D1	-1.44733	2.22e-09	4e-17
SPARCL1	-1.44718	1.85e-16	4e-17
ZNF662	-1.44699	1.66e-10	4.17e-17
ACVR2B-AS1	-1.44674	1.24e-14	4.23e-17
SOWAHB	-1.44579	1.66e-10	4.24e-17
SLC35F1	-1.44473	2.16e-08	4.36e-17
AMIGO1	-1.44466	5.29e-15	4.43e-17
ST8SIA5	-1.44327	3.15e-07	4.45e-17
ALDH1A3	-1.44266	4.27e-11	4.5e-17
LINC00561	-1.44202	0.0191735	4.66e-17
DOCK3	-1.4411	7.44e-12	4.75e-17
TCEAL5	-1.4387	1.7e-09	4.76e-17
WWC1	-1.43749	1.94e-31	4.81e-17
CFAP99	-1.43714	1.03e-09	4.81e-17
SMAGP	-1.43672	3.06e-32	4.83e-17
CD24	-1.43644	4.02e-12	4.84e-17
LINC01135	-1.4355	7.83e-18	4.86e-17
FAM177B	-1.43537	7.86e-15	5.06e-17
CCDC9B	-1.43419	1.95e-14	5.07e-17
KCNJ2-AS1	-1.43416	2.36e-15	5.08e-17
MYOG	-1.43383	0.00657412	5.22e-17
EDNRB	-1.43348	4.79e-15	5.24e-17
ABLIM3	-1.43336	6.33e-15	5.27e-17
ZBTB7C	-1.43298	8.59e-09	5.27e-17
TMEM272	-1.43119	4.67e-07	5.3e-17
LIPE	-1.43117	9.39e-16	5.37e-17
FLG	-1.4311	9.02e-05	5.45e-17
MAK	-1.43042	7.98e-13	5.45e-17
DYRK1B	-1.43022	3.98e-20	5.47e-17
SNTA1	-1.43011	1.77e-19	5.49e-17
LINC01644	-1.42949	0.000324676	5.5e-17
NNT	-1.42937	3.81e-25	5.52e-17
KRTAP5-AS1	-1.42705	2.2e-08	5.59e-17
ISM1	-1.42666	1.32e-11	5.62e-17
FZD4-DT	-1.42553	6.78e-15	5.63e-17
LCN10	-1.42472	1.32e-06	5.64e-17
ROR1	-1.42455	1.11e-10	5.73e-17
CASC16	-1.42447	0.00410716	5.77e-17
PCOTH	-1.42217	2.21e-14	5.87e-17
CYP4F22	-1.42172	2.78e-05	5.92e-17
FGF14	-1.42158	1.81e-07	6.01e-17
ZNF429	-1.42142	2.11e-12	6.01e-17
CPEB4	-1.42125	1.27e-21	6.03e-17
PRELP	-1.42097	2.09e-07	6.26e-17
SATB1	-1.42039	1.58e-19	6.28e-17
BMP5	-1.42026	0.000311691	6.31e-17
KLK11	-1.41913	5.8e-08	6.35e-17
FLNC-AS1	-1.41895	0.00249563	6.4e-17
DUSP1	-1.41633	1.1e-14	6.59e-17
CCDC13	-1.41628	2.48e-14	6.59e-17
SPTSSB	-1.41602	1.08e-06	6.75e-17
SNTG2	-1.41542	1.37e-07	6.76e-17
SLC7A10	-1.41538	0.000499612	6.83e-17
SCARA3	-1.41432	9.07e-14	6.83e-17
PDCD4	-1.41428	3.46e-38	6.95e-17
PBX1	-1.41266	5.67e-11	7.09e-17
LOC101928896	-1.41222	0.000230963	7.17e-17
PCOLCE2	-1.41148	3.41e-06	7.18e-17
UGT2A1	-1.41059	0.000293599	7.43e-17
AVPR2	-1.41036	4.85e-12	7.45e-17
CTXND1	-1.40914	1.33e-10	7.51e-17
ECHDC3	-1.40859	2.99e-08	7.55e-17
C3orf18	-1.40789	6.87e-19	7.61e-17
TMEM217	-1.40771	8.76e-22	7.69e-17
SLC14A2	-1.40703	5.11e-10	7.74e-17
NEURL3	-1.40585	3.91e-08	7.74e-17
RAET1E-AS1	-1.4038	5.38e-09	7.75e-17
[truncated: 11,923 more rows]
