# Supplementary material for: An Integrated Analysis of Prognostic Signature and Immune Microenvironment in Tongue Squamous Cell Carcinoma
Source: Front Oncol. 2022 Jul 13;12:891716. doi: 10.3389/fonc.2022.891716 (PMC9326056; doi:10.3389/fonc.2022.891716)
Supplement: Supplementary Table 3 — The interacted genes from Cox analysis and the comparison of cancer and normal tissue. [file Table_3.xlsx]

## Sheet: Sheet1
Down-regulated in cancer and associate with better survival	Up-regulated in cancer and associate with poor survival
PITPNM3	MTHFD2
ANKMY1	GNG10
SLC35E2B	HPRT1
SPNS3	EFNB2
CD5	HOXA1
NOSTRIN	MORF4L2
USP9Y	TOMM34
TXK	NMD3
SGSM2	MTHFS
DENND1C	P4HA1
RAB37	STC2
DCLRE1C	PGK1
SLC23A1	STC1
DENND2D	SSB
ZNF823	TRPA1
RASGEF1B	CYB5B
IKBKB	PSMD7
ABCB1	RNF121
ZBTB49	LASP1
ZNF20	CFAP20
SMIM14	PCGF2
ZNF763	MAP7D3
MEIS1	CDH6
ODF4	RRAS2
ZFP3	C16orf87
VWCE	CHGB
CD40LG	GPR50
EPHX3	HOXA11
KLRB1	PDGFA
ATP2A3	TOR1A
FRAT1	TXNDC9
TMEM220	SYT1
ZNF862	TEX19
DPY19L3	INSIG2
DNAH1	CALCA
FAM193A	PRPS1
EZH1	FTH1
RGS13	CCBE1
ZNF791	ZP3
ZNF347	METTL5
PPFIBP2	CSNK2A2
GNG7	RALB
RAB11B	PSMA6
EXPH5	ADA
MAST4	ANO1
CCDC146	ANXA5
ZNF44	PLS3
GAK	PLAU
TTC21A	NAT10
ATXN7	PARN
PDIK1L	APP
PIK3C2B	DCBLD2
ZNF554	YWHAG
FAM177B	RASGRF1
ZNF546	HBQ1
DTX1	TNFRSF12A
WDR48	PLOD2
NFIA	SPINK4
AVPR2	PSMD10
ZNF837	WNT7A
CDK19	MKRN3
GIMAP7	LCLAT1
C17orf107	EIF5A2
CELF2	PAPPA2
CENPC	ANAPC10
RGS5	IL1RAP
ABCD2	FADD
CCDC97	SFTPB
WDR19	COX7A2L
DUSP16	CHD1L
FAM162B	GFY
TCEANC2	PSMD14
ZNF491	C7orf25
PKD1	NUDT11
MAP3K6	HOXA10
SLC5A9	HNRNPC
GIMAP1	SET
XCR1	L1CAM
HECTD4	PTDSS1
LIPE	RTN4R
SPACA4	PJA1
HERC1	SLC30A10
MAU2	DDX18
PPARGC1B	SPG21
PLXNB1	BFAR
SBF1	TMED7-TICAM2
PAOX	ASNS
FUCA1	STARD3NL
PHACTR4	USP41
ZNF33A	LSM12
ZFP14	DHCR7
IPCEF1	RELT
AHDC1	ALX1
MTHFR	SLC7A6OS
PPIP5K2	GARS
MBNL3	STIP1
ALDH2	NEU1
LMO4	DIABLO
ARHGAP26	ITGA5
WDR37	OAF
ECHDC2	PHF5A
GOLGA8N	OXCT2
ZNF471	PSMD11
INSR	GNPDA1
NISCH	AMZ2
ZNF879	CAV2
IP6K1	CDC27
ZZEF1	DNAH14
P2RY14	ABL2
SLC13A2	PPME1
WDTC1	RAB5C
LRRC56	C1QL1
ARID4A	SLC25A17
ATP9B	SEMA3A
ZNF619	SUPT3H
DNM2	GAST
SH3BP5	PSMD2
ZNF566	LRRC9
C16orf96	WDR54
GH1	DSCAM
FAM120C	PRR11
ZNF441	PNO1
TNRC6C	ZP1
YTHDC2	CT45A5
MAP3K14	KNSTRN
ZNF799	PDIA6
CGNL1	TRMT12
DOC2B	PGM3
CYP4X1	SMS
BOC	NUDCD1
TESK2	TBL2
RPS6KA5	NIP7
ADCY4	ATG5
AGO4	OSGIN2
POLH	CXorf56
USP6NL	HAUS6
KLRF1	AGPS
ITM2A	UCHL1
GNMT	ZDHHC9
ERBB3	G2E3
VMAC	HIST1H2BH
IKZF4	GALNT14
ZNF426	CENPBD1
UBN2	SOX1
PPM1M	HSPA5
LMF1	IL1A
FNBP1	SCGN
SH2D4A	SLC6A15
PLSCR4	TMEM185B
TIFA	PRAME
ARHGEF3	TSPAN5
SHMT1	PNMA1
CCDC159	SLC15A4
ART4	CBX3
RAF1	CT45A10
CCDC149	CNIH4
TMSB4Y	AMZ1
RSPO1	TMEM97
ANKRD55	MCEMP1
SLC18B1	SUSD1
GLTPD2	UTP6
MAGIX	CCL26
TJP3	SFXN1
KL	PFN2
SLC25A23	HSP90AA1
PLD4	HSP90AB1
INTS10	TMEM87B
USP19	AMIGO2
VILL	AURKA
TSHZ1	GANAB
GYPC	HNRNPK
ITSN2	FOXB1
AQP1	HOXB8
N4BP3	PDCD10
APPL1	NETO2
USHBP1	TMEM163
HOOK1	MSANTD3
GRIN2C	PXN
KIF27	GHRH
LIMD1	FBXO7
MAP1LC3A	OR5M11
SEMA4D	KIF1A
RREB1	DCBLD1
ANKRD28	AXL
FUT2	LHX1
RBSN	ITGA3
MASP2	C5orf15
CCDC96	MRPS23
TBC1D17	MINPP1
D2HGDH	NUP37
IL34	TMEM105
HLF	TMEM136
ABCA7	IFT20
NCALD	CHRNA5
PCF11	DSG2
TMEM150C	GPN1
PER3	TINAGL1
GIMAP6	OSTC
ZNF41	IGF2BP2
PKLR	ARL6IP1
CUBN	KPNA2
ZNF540	TCFL5
ZNF501	PITPNB
ANO8	UBE2A
GPR55	ADAT1
TRIM35	FAM216A
TRPS1	ASCC1
IL20RA	PIGS
KCNIP2	SLC16A3
FEM1A	XPR1
NCOA2	B4GALT3
IKZF2	CDC42EP3
ZBED3	ZNF697
SCYL3	UBE2E3
EVA1C	KLK9
C20orf202	MARVELD3
RAMP2	F2RL1
FAM107B	TSEN15
MPND	FKBP14
CHDH	NEK6
GPRASP1	PPIL1
FCN2	SLC20A1
CPAMD8	SLC5A12
CABLES1	SLC39A1
ZFP28	GNGT1
PRDM2	MPLKIP
UBAP1L	SSR3
ZNF671	TPP1
ZFP2	AKR1C4
ULK3	PPP1R18
AMY2B	PDIA3
CYP8B1	SPERT
EPC1	DKK1
FAM83E	CHRNA9
EPB41	PAFAH1B2
LCORL	PTGES3
NKX2-3	ZDHHC16
CAPN7	GALNT2
C12orf74	DGKG
TRIOBP	SNAPC1
ZNF662	JKAMP
KMT2C	GDI1
ACOX3	BAG2
CDKN1B	GEMIN2
ANKRD13A	CHCHD2
BEND5	TMEM230
CSK	ARSI
PSD4	TTC7B
PARD3B	HSPD1
ZNF852	CERS2
KANK3	UGGT1
MON2	SUMO1
CREBRF	SLC38A6
FAM214A	MNAT1
NRIP2	TTPAL
RCSD1	SPANXN3
PBRM1	CGB2
TRMT44	CYTH3
PTPRN2	CCT4
F5	FAM169A
IFFO1	AARS
KIAA1217	DKK3
ADARB2	CTTN
ACAA1	KIF7
ADAM33	TXNRD1
SH2B1	MME
SPATA32	EGFR
SCARA5	CMC2
PTPN13	NCBP2
GMPPB	SHCBP1
RNF225	RTTN
SATB1	FUBP3
IL26	NIFK
CPEB3	CMSS1
HDAC6	NKRF
PCM1	MAGEF1
LRMP	CFDP1
ZNF493	PSMC2
GARNL3	TMEM236
NBPF26	LAPTM4B
ZNF596	TTC9C
NPY5R	GNA12
ZNF382	EQTN
SAMD10	TES
YPEL3	TRABD2A
ZNF135	C8orf33
NCOA1	ZNF639
IFT140	COLGALT1
RUFY3	BCAP31
MBTD1	AP2B1
KIT	GPR87
LRRC74A	SENP2
PRKCH	TMEM9
OGFRL1	ITGB6
FRZB	CCDC59
ZSWIM4	EIF2AK1
PAQR8	FUBP1
CCDC30	B4GALNT1
HIPK1	NPTX1
LRRC20	H2BFM
ZNF844	SCG5
SPNS2	ERP44
ARHGEF6	TLR2
FAM107A	INHBA
ZNF100	UBE2Q1
ZNF836	GABRA3
TCN1	ANLN
SIGIRR	ATIC
AGBL3	LRRC59
RNASE13	TDRD5
SPINK7	ANP32A
ZNF570	STK3
JADE1	BMS1
SIM2	LAMA3
TIAM1	NOLC1
ADH6	DCUN1D1
CYP7B1	DDOST
ZNF564	LGALS1
RND1	OSTM1
ZNF132	HMMR
SHE	ALG3
EHF	CT45A1
TCEANC	PAICS
ZNF625	CTCFL
CFP	RSPO4
DAPK2	PON2
ZNF197	FAM86C1
KLB	HEXB
ZNF214	KLK4
GDF7	RDH11
PXMP4	DCAF13
SIDT1	MSC
CA5B	ACTL6A
KAZN	SQLE
ZKSCAN7	ABCF1
ZNF677	ALDOC
MLLT6	TMEM92
EPB41L4A	DNTTIP1
SASH1	RPN2
TMEM132C	TXNDC12
DUOXA1	TRIM15
CLEC14A	MYO1B
TPRG1	KDELR2
GPRIN2	SMKR1
IL17A	TMEM177
KIAA0355	TRIB3
MTMR12	BCAM
KIF13B	STX3
PNPLA7	TRIM10
ATG9B	AP2M1
ARHGEF10L	TOR1B
ELF2	FRMD5
CRACR2B	SRSF9
GPR12	NONO
PITX1	RAB32
PDZD2	C3orf52
CBX7	HSP90B1
CFLAR	ADAM17
BLNK	NCSTN
C3orf49	TUBA1B
NBEAL2	FCGR2A
RDH13	ELFN2
AACS	NSMCE2
AZGP1	ARF3
IQCK	PRELID2
CLDN10	STARD4
RALGPS1	SEC14L2
MTF1	PKHD1
PTPN18	PLK1
GTF2IRD2B	FAM49B
USP4	GPR180
LENG9	HMGXB3
SYNE3	C9orf153
AQP5	NAA11
FAM221B	STX1A
NAGK	KCTD5
C6orf132	SURF4
RAMP3	SERPINH1
TLR5	USP14
FAT4	ARL14EPL
VPS13D	NPW
BHLHE22	CRKL
TCP11L2	HMGN4
ZC3H6	YWHAQ
NCCRP1	E2F4
NFIC	KDELR1
CACNA1D	CRYBA1
CAMK1D	LIMS1
ZFP82	ZCCHC12
STK38	EMC8
PYROXD1	NAE1
ATXN7L1	RPL26L1
NTN1	FOXL2NB
MYO5B	CBFB
RNF224	VCX3A
DDI2	IAPP
RMND5B	DHX16
RNF150	TSN
RASSF5	PPHLN1
SESN1	STK17A
SNRK	ERAL1
DEAF1	ASMT
ZNF442	DUSP10
CYP27A1	UBQLN1
MADD	KPNB1
TTC34	FAM120A
TADA2B	SH3KBP1
HACE1	PMFBP1
TOP2B	ULBP2
FAM3D	MAGEB2
TMEM80	NMUR2
CYB561D1	NRSN2
OXNAD1	RYR2
ZNF561	SHC1
NICN1	UHRF2
A2ML1	MANBA
SPSB3	NUP93
FAM13B	MTDH
LIN54	NT5E
NOS2	LIMA1
AHCYL2	ADRA1B
TBL1Y	GLS
FOXO4	FEZ1
PP2D1	MAGEA9
PER2	LSR
NYNRIN	CHAT
LIPI	SMURF2
TMC1	GABRR1
LPIN1	MAGEA4
SLC46A2	TBL1XR1
KLHDC1	FAM3C
MED16	UIMC1
KIAA1328	G3BP1
ZNF577	SLC35G1
MAP3K1	G6PD
C1QTNF7	C5orf58
GRHL3	AATF
HCAR1	ORC5
NXPE4	SLC25A32
GRAMD1C	GJB7
NFKBIZ	SLCO1B1
WDR62	CXCL8
USP54	SLC38A7
PCP4L1	PPP1R14C
ZCWPW2	WDR75
FAIM2	CSGALNACT2
MANEAL	GLA
TCHP	FADS3
DMBT1	C10orf55
	SLC2A9
	MARK4
	BRMS1L
	HOXB9
	PSMD5
	CORO1C
	HIST1H3C
	OLR1
	POTEF
	DIAPH3
	ARMC10
	PYGL
	HTR2C
	GATAD1
	ZNF281
	POLE3
	CRCP
	EVA1A
	NME7
	CKAP5
	FSIP2
	CHRNB4
	CCT3
	FLNA
	RCN1
	MRPL47
	SKA2
	ADTRP
	TBPL1
	YARS2
	ERVV-2
	SLC30A6
	SMYD3
	KCNH3
	IRF6
	CSF2
	PVR
	SNW1
	KBTBD2
	SMYD2
	KLF7
	TENM2
	FOXA2
	IRAK1
	DDX53
	MR1
	ADD2
	LAMB3
	NIPSNAP1
	ACLY
	SNX10
	DOLK
	MMP14
	MAGEC2
	UGGT2
	SLC35A2
	TMX1
	MXRA7
	POLD2
	BASP1
	POU6F2
	MED15
	TPST1
	MAD2L1
	AMMECR1L
	HSPH1
	NOP58
	AIDA
	FAM104A
	LRP12
	KIAA1324L
	H2BFWT
	AGPAT4
	ADORA2B
	PDX1
	HIST3H2A
	IGSF11
	ATP8B3
	CALU
	STRAP
	SLC29A4
	RNF26
	FAM189B
	CNTN5
	CAV1
	GOPC
	SLCO1B7
	CHST11
	SLC2A6
	FAF2
	CMIP
	TRPC4
	ERCC3
	DERL1
	CALB1
	BCHE
	SYT12
	DDIT4
	CHURC1-FNTB
	TPTE2
	RCN2
	DSE
	ATRN
	GGCT
	ACTN1
	PAH
	PANX2
	USB1
	INTS8
