# Supplementary material for: An Integrated Analysis of Prognostic Signature and Immune Microenvironment in Tongue Squamous Cell Carcinoma
Source: Front Oncol. 2022 Jul 13;12:891716. doi: 10.3389/fonc.2022.891716 (PMC9326056; doi:10.3389/fonc.2022.891716)
Supplement: Supplementary Table 4 — Cox analysis of prognostic genes in GSE65858. [file Table_4.xlsx]

## Sheet: sheet1
Id	HR	HR.95L	HR.95H	p-value
LOH12CR1	0.044069	0.00277998	0.698593	0.0268031
BCL6B	2.13126	1.05205	4.31757	0.0356567
LOC401010	5.09045	1.05228	24.6252	0.0430395
ITGA11	2.5854	1.27123	5.25811	0.00872739
TICAM2	2.31452	1.1408	4.69584	0.0200769
SPP1	1.28873	1.10406	1.50429	0.00130683
MFN2	0.515206	0.288506	0.920041	0.0249839
SELM	1.43676	1.01301	2.03777	0.0421055
LOC652663	59.3315	2.1755	1618.13	0.0154874
LOC653210	52.5759	1.72043	1606.7	0.0231508
STK10	3.53488	1.42072	8.79507	0.00662656
RBM11	0.0765572	0.0109543	0.535043	0.00958624
BASP1	1.36256	1.04641	1.77423	0.0216324
SETD8	0.440449	0.213536	0.908487	0.0264335
PPEF1	7.13387	2.36804	21.4912	0.000479265
AGFG2	26.1019	1.16234	586.154	0.0399058
WDR91	1.77859	1.04386	3.03048	0.0341889
RAB2A	2.18917	1.14268	4.19403	0.0181736
PHKB	0.291964	0.117201	0.727323	0.00820183
MANSC1	0.3921	0.203657	0.754908	0.00509163
GBGT1	3.30978	1.28059	8.55438	0.0134943
COL4A1	1.63605	1.24062	2.15752	0.000487838
LOC642934	0.536365	0.329804	0.872298	0.012053
ECH1	0.540383	0.311629	0.937057	0.02842
SH3D19	0.601952	0.376322	0.962863	0.0341862
CLEC10A	0.0251951	0.00107777	0.588989	0.0220709
EFEMP2	1.57571	1.05219	2.35973	0.0273242
LOC441662	165.581	5.19245	5280.17	0.00382264
ZWINT	0.0405322	0.00190538	0.862221	0.0398794
FUT3	0.734529	0.541548	0.996277	0.0472615
RBBP4	4.84937	1.01588	23.1488	0.0477346
MYCN	3.46369	1.05743	11.3456	0.04015
WDR63	0.139305	0.0207968	0.933113	0.0422238
LOC388282	15.9217	1.63322	155.215	0.0172098
AGPAT3	0.110983	0.012752	0.965908	0.0464386
CX3CL1	0.718992	0.539414	0.958354	0.0244429
ZDHHC20	4.98484	1.58368	15.6904	0.00603599
ATP1B3	0.693031	0.504654	0.951726	0.0234707
HEYL	1.83104	1.24497	2.69299	0.00211762
C12ORF48	15.5341	2.22712	108.349	0.00564115
CPSF1	1.74072	1.04676	2.89476	0.0326734
RALGPS2	12.1006	1.37142	106.769	0.0248151
TRIM32	2.34166	1.11702	4.90895	0.02426
CLDN22	0.526315	0.296844	0.933175	0.0280446
CLC	8.17989	1.7807	37.5754	0.00689843
LOC645931	16.3277	1.67121	159.522	0.0163254
LOC644680	67.3544	2.62571	1727.77	0.0109874
CASZ1	0.499369	0.303203	0.82245	0.00637574
LOC650628	17.9785	1.8661	173.209	0.0124292
DCLRE1B	0.191456	0.0408289	0.897784	0.0360179
LOC730344	0.0931832	0.0130202	0.666893	0.018107
CAPNS1	0.538849	0.303135	0.957853	0.0351456
TSPAN3	0.551062	0.33606	0.903615	0.0181948
C1ORF124	0.426353	0.20741	0.876414	0.0204071
ZMYND12	0.105815	0.0165754	0.675513	0.0175624
ARPC3	2.10447	1.04545	4.23626	0.0371167
SARS2	0.506403	0.283704	0.903915	0.0213528
CNNM4	4.16128	1.18691	14.5894	0.0259018
LOC400879	52.3291	3.08066	888.881	0.00617132
MMP11	1.25087	1.03948	1.50525	0.0177897
C7ORF54	1.84795	1.00457	3.3994	0.0483118
PLAU	1.28471	1.02019	1.61781	0.0331815
H3F3A	0.400573	0.168192	0.95402	0.0388024
GOSR2	2.80274	1.12301	6.99492	0.0272042
NMT2	2.2757	1.08457	4.77498	0.0296554
RPL27	2.31776	1.0081	5.32885	0.0478199
VPS13D	0.218959	0.0645657	0.742546	0.0147806
LOC440508	52.4087	2.95251	930.282	0.00698253
SKAP2	2.26967	1.0081	5.11003	0.0477667
MAGEL2	6.16899	1.27642	29.815	0.0235995
VAV3	0.695523	0.493581	0.980086	0.0379947
TRIM29	0.703646	0.502921	0.984485	0.0402458
LOC728946	55.3645	1.12014	2736.46	0.0436981
LOC643403	97.0964	4.54632	2073.7	0.00339548
FAM83E	0.483511	0.284078	0.822952	0.00740442
LOC728760	0.0587885	0.0051563	0.670264	0.0224796
CDH23	16.9007	1.00536	284.112	0.0495678
ATP9B	0.205571	0.0471537	0.896203	0.035218
LCP2	2.75228	1.12775	6.71695	0.0261434
POLR2C	0.445209	0.223662	0.886207	0.0212279
HBS1L	5.87569	1.18003	29.2566	0.0306117
MAGEH1	2.25333	1.02439	4.95663	0.0433965
ATP6V1C1	2.91168	1.17816	7.19587	0.0206062
DNAJC3	2.74847	1.12581	6.7099	0.0264053
C1ORF216	4.18177	1.40341	12.4606	0.0102188
FLJ32658	138.698	6.07582	3166.16	0.00199797
FCGR2B	1.88449	1.10355	3.21808	0.0202957
P2RY6	2.42809	1.25465	4.69904	0.00845393
LOC728285	19.0801	1.80719	201.445	0.0142033
PPP4R4	1.95666	1.0289	3.721	0.0406741
TSHR	23.1068	1.00918	529.066	0.049335
RAB31	1.70544	1.14853	2.5324	0.00813318
ATP2B3	0.0293164	0.00154448	0.556467	0.0187602
CLCN3	0.54862	0.330451	0.910827	0.0202828
ALG11	4.96507	1.30124	18.945	0.0190087
NEK6	2.09177	1.08919	4.0172	0.0266525
SNORA7B	4.25899	1.37659	13.1767	0.0119165
PER3	0.421308	0.237283	0.748055	0.003168
LOC650034	0.138886	0.0257315	0.74964	0.0217352
LOC645032	59.8763	1.67639	2138.63	0.0248866
LOC643433	1.88092	1.09767	3.22305	0.0214992
PKP4	0.166748	0.0298836	0.930436	0.0411351
GRIK2	30.812	1.40826	674.15	0.0294485
RFNG	51.3527	2.32224	1135.58	0.0126559
SH3GL2	0.0338959	0.00275437	0.41713	0.00822506
LOC389827	139.47	6.11073	3183.23	0.00197353
FSTL4	19.7453	1.20345	323.967	0.0366447
DDIT4	1.28927	1.00219	1.65859	0.048043
LOC644760	3.20412	1.2663	8.1074	0.0139545
CTF1	0.119366	0.026365	0.540421	0.00580366
CSF2	1.44381	1.07021	1.94782	0.0162102
PI15	1.81912	1.27854	2.58828	0.000882088
DLK2	21.004	2.49017	177.163	0.00513317
GUCA1A	23.0421	1.67254	317.444	0.0190629
SMA5	2.97129	1.01884	8.66527	0.0461357
MAP7D3	4.90505	1.65689	14.5208	0.00408094
C1GALT1	2.10051	1.12024	3.93857	0.0206696
TFPI	1.50832	1.03941	2.18876	0.0305081
USPL1	3.01988	1.42419	6.40341	0.00395095
OTOP3	0.143767	0.0324102	0.63773	0.0107168
CITED2	1.58568	1.05207	2.38993	0.027632
TTLL12	0.62443	0.40432	0.964367	0.0337049
MATN3	6.14313	1.53043	24.6585	0.0104643
CAMK2B	13.7409	1.01155	186.657	0.0489999
ZNF541	0.478296	0.25544	0.895579	0.0211904
COX5B	0.539002	0.299363	0.970473	0.0394122
ATP13A3	3.05519	1.16247	8.0296	0.0234929
SIX2	0.0840065	0.0100123	0.704845	0.022474
MAGI3	0.156609	0.027262	0.899654	0.037662
GLIS3	14.9223	2.18504	101.909	0.00582708
LEPRE1	2.66093	1.58585	4.46485	0.000210392
LOC644655	18.6732	1.91031	182.53	0.0118555
SGIP1	2.22433	1.11982	4.41827	0.0224214
ALG5	2.07434	1.13563	3.78896	0.017608
EFR3A	2.0475	1.04063	4.02861	0.0379597
WSB1	2.55901	1.31882	4.96544	0.00546603
SERINC3	3.61171	1.14882	11.3547	0.0279951
FKBP14	1.97393	1.12292	3.46989	0.0181386
RPRM	0.513056	0.298258	0.882547	0.0158904
ROBO4	9.776	2.54404	37.5662	0.000901905
MGC4677	3.6067	1.2755	10.1986	0.0155718
LOC644869	0.293002	0.0902641	0.9511	0.0410109
LOC648138	49.9772	1.64915	1514.55	0.0246153
ANGEL1	3.73314	1.36992	10.1731	0.0100145
LOC651772	16.4122	1.06009	254.093	0.0453159
CECR1	29.6302	1.02895	853.251	0.048086
LOC646012	47.9923	1.63144	1411.8	0.0248546
COX11	0.0392669	0.00329866	0.46743	0.0104144
ZNF75A	0.291721	0.108068	0.787481	0.0150359
FAF1	0.447612	0.206319	0.971103	0.0419347
SHOX2	14.578	3.17377	66.9611	0.000571721
PHLDB1	2.04434	1.27047	3.28958	0.0032158
FCGR2A	1.49476	1.06521	2.09753	0.0200497
LOC652676	40.9686	2.22928	752.901	0.0124295
SPTBN2	0.239949	0.0867868	0.663411	0.00594438
S100A13	0.0399193	0.00190639	0.835902	0.0379435
NKX3-1	0.532978	0.338931	0.838122	0.00643908
INPP1	0.712795	0.512633	0.991111	0.044109
C14ORF149	2.97011	1.23692	7.13189	0.014863
LOC644763	20.4949	1.41464	296.924	0.0268094
LOC283953	2.80353	1.33587	5.88364	0.00641815
ALDH3A2	0.499483	0.273257	0.913	0.0240875
HBA2	1.2458	1.08449	1.4311	0.00189365
CMTM3	13.181	1.21054	143.521	0.0342764
SPATA18	0.463281	0.255921	0.838655	0.0110513
ESAM	2.09391	1.20134	3.64964	0.00913168
LMF1	0.247353	0.0676401	0.904543	0.0347195
OAF	1.51919	1.00326	2.30044	0.048229
LOC340515	13.4356	1.16783	154.573	0.0371198
HPX	28.7257	1.57979	522.325	0.0232701
LOC401115	1.6981	1.20333	2.39629	0.00258428
FLJ20850	0.0809281	0.00938455	0.697888	0.0221851
CENPM	0.256398	0.0815667	0.805964	0.0198528
SLC2A14	2.21927	1.20815	4.07662	0.0101869
CIDEB	0.21351	0.109835	0.415045	5.29e-06
XPNPEP1	0.38052	0.170104	0.851221	0.018668
FOXQ1	0.743184	0.595326	0.927765	0.00873116
FUNDC2	0.0252051	0.000994097	0.639071	0.0256544
PTPRR	11.7877	1.36677	101.662	0.0248202
LOC388177	0.026666	0.00103717	0.685589	0.0286823
CNOT1	0.439843	0.23342	0.828815	0.0110602
RUNX1	10.4878	1.64288	66.9526	0.0129605
E2F3	1.90193	1.01067	3.57916	0.0462759
LOC646609	5.76212	1.43838	23.0829	0.013385
TMEM108	2.38512	1.04652	5.43589	0.0386254
PRLR	2.95589	1.36995	6.37782	0.00574113
EGFL7	10.9339	1.42651	83.8066	0.0213452
ARHGEF16	0.516291	0.339354	0.785481	0.00201673
PDK1	4.96047	1.6114	15.2701	0.00524459
HK3	5.09752	1.89836	13.688	0.00122993
SCGB3A2	2.57	1.01045	6.53662	0.0475031
GPM6B	48.0244	2.20133	1047.71	0.0138298
ANKRD20A1	0.322189	0.128455	0.808113	0.0157755
SERPINA12	13.7777	2.34027	81.1131	0.00373161
MSL3	3.95177	1.41591	11.0293	0.00868867
GRPEL1	2.02775	1.01378	4.05586	0.045644
CEACAM5	0.795838	0.649694	0.974857	0.0273874
PTP4A2	17.5586	1.20833	255.149	0.0358567
LOC647310	66.2126	1.86435	2351.55	0.0213378
CLIC4	3.22251	1.56301	6.64397	0.00152567
CACNA1H	3.5593	1.65456	7.65681	0.00116095
ING2	0.38841	0.165315	0.912573	0.030016
PRODH	0.619884	0.451769	0.850557	0.00304887
LOC651845	11.611	1.44968	92.9973	0.0209007
CCL3	1.57632	1.13754	2.18433	0.00625272
HMX2	0.185361	0.0363078	0.94632	0.0427344
EPB49	0.398239	0.16917	0.937484	0.0350527
ACTA2	1.39759	1.08532	1.79972	0.00947265
LOC643911	0.557767	0.329395	0.944468	0.0298123
EYA4	0.186289	0.0519893	0.667512	0.0098602
HOXD4	20.1136	1.95383	207.058	0.011636
PIGY	0.503208	0.265257	0.954615	0.0355412
ZAK	3.07576	1.0901	8.67842	0.0337566
COL10A1	1.56438	1.08149	2.26289	0.0175051
SH2D5	3.49895	1.02159	11.9839	0.0461553
SSH2	1.91534	1.00003	3.66841	0.0499893
TWIST1	1.51984	1.05085	2.19814	0.0261898
WDR62	0.31586	0.101173	0.98611	0.0472509
PCDH12	6.26164	1.43105	27.3982	0.0148557
CD97	1.58044	1.09329	2.28465	0.0149184
LOC649396	19.7024	1.03489	375.096	0.0473924
LOC650251	0.0254876	0.00106267	0.611306	0.0236019
H2AFY	1.98567	1.01832	3.87196	0.0440894
LOC400197	36.1348	1.57955	826.639	0.0246905
RALGPS1	0.598837	0.374425	0.957752	0.0323446
HCFC2	3.1413	1.31124	7.52553	0.0102329
LOC653354	0.263927	0.0786406	0.885768	0.0310587
PARD6G	0.544535	0.347461	0.853385	0.00801093
ANGPTL4	3.95044	1.00789	15.4838	0.0486966
PITX1	0.684928	0.536709	0.87408	0.00235283
ZNF143	3.19071	1.00442	10.1358	0.0491318
C9ORF3	0.511852	0.300589	0.871596	0.0136633
LOC402538	13.3638	1.43352	124.582	0.0228372
LOC650845	46.3187	1.64934	1300.78	0.0241952
LOC375295	1.44486	1.06398	1.96209	0.0184146
C1ORF115	0.626963	0.4088	0.961551	0.0323827
GDNF	89.9278	2.46114	3285.88	0.0142651
ANO6	1.79722	1.0783	2.99544	0.0244999
ENPEP	2.43423	1.23824	4.7854	0.00989172
KIAA1462	44.9093	2.25937	892.657	0.0126193
C12ORF54	0.632052	0.412515	0.968426	0.0350887
FN1	9.95329	2.07919	47.6474	0.00402585
PPFIBP2	0.647502	0.439552	0.953832	0.0278692
HIGD1B	8.62754	1.87145	39.7736	0.00571461
ALOX15	0.0722026	0.010028	0.519865	0.00906835
DIP2C	2.54312	1.12891	5.72896	0.0242855
BAZ2A	78.5795	3.62194	1704.82	0.00544048
SIGLEC12	6.09226	1.63816	22.6569	0.00700749
PMS2L2	0.230869	0.0608567	0.875834	0.0311735
VSNL1	0.667876	0.474303	0.940451	0.0208022
IMPDH1	1.59684	1.00969	2.52543	0.0453697
KGFLP1	16.4747	1.81781	149.309	0.0127248
PTPRZ1	0.698581	0.535928	0.910598	0.00798964
CCNO	0.555228	0.338341	0.911147	0.0199035
LOC645553	2.14541	1.11253	4.13724	0.0227137
C2ORF40	0.18648	0.0562392	0.618334	0.00603299
NR1D2	0.43792	0.231843	0.827174	0.010937
ZNF300	0.243119	0.069696	0.848069	0.0265224
DDIT3	1.616	1.00177	2.60685	0.0491588
LOC338579	0.0801588	0.0088166	0.728788	0.0250341
RGS19	2.28558	1.26051	4.14425	0.00647986
CAPN13	0.657907	0.451155	0.959407	0.0296108
IGFBPL1	4.14685	1.00259	17.152	0.0495846
SLC10A7	0.108017	0.0139857	0.834252	0.0328664
PVR	2.348	1.22352	4.50595	0.0102718
LOC387763	1.48008	1.17703	1.86114	0.00079533
GLS2	0.206343	0.0769029	0.553651	0.00172438
RAB4A	0.285614	0.109514	0.744884	0.0104022
LTF	0.561312	0.37609	0.837753	0.00470686
LOC653764	25.1079	1.81548	347.239	0.016176
MAZ	3.45853	1.3675	8.74696	0.00876497
TMEM41B	2.26801	1.01572	5.06423	0.0457139
RHOJ	2.3668	1.22121	4.58703	0.0107137
AASS	0.343715	0.129628	0.911377	0.0318346
N4BP3	0.0639117	0.00412498	0.990238	0.0491855
FLJ13224	0.0204119	0.000819664	0.508315	0.0176693
MPRIP	2.07764	1.05957	4.0739	0.0333062
TAF15	0.6749	0.455952	0.998986	0.0494104
SIL1	1.76777	1.0974	2.84764	0.0191775
POMT2	2.10892	1.0963	4.05687	0.0253918
HAPLN1	16.5148	2.06532	132.056	0.00819977
CCR1	2.16017	1.027	4.54367	0.0423377
THBS2	1.29621	1.03406	1.62481	0.0244186
RAB9B	5.1208	1.29761	20.2085	0.0197052
NSMCE4A	0.477759	0.25871	0.882276	0.0182664
CLCA4	0.857183	0.743726	0.987947	0.0333902
UGT2B7	0.569163	0.378538	0.855782	0.00676109
TGM2	1.99903	1.16958	3.41673	0.0113181
SH2D4A	0.35886	0.182022	0.707498	0.00308581
DEFA1B	14.4936	1.27805	164.364	0.0309298
MLF1IP	0.65391	0.433268	0.986913	0.0431052
LOC649990	25.5299	1.25716	518.45	0.0349503
LOC654155	8.01455	1.11388	57.6658	0.0387264
SCGB3A1	0.801686	0.666857	0.963774	0.0186375
LOC728939	624.072	11.6245	33503.8	0.00153992
SLC25A23	0.583818	0.403293	0.845151	0.00435349
AKAP14	0.0404262	0.00324131	0.504201	0.0127089
FAM65A	1.86928	1.09033	3.20474	0.022943
NUDT13	20.8573	1.1265	386.176	0.0413546
CSHL1	10.0625	1.65525	61.1714	0.0121684
PLXNA2	0.112857	0.0224354	0.567705	0.00812469
NT5DC1	0.551298	0.311201	0.976635	0.0412511
C5ORF13	1.44003	1.01853	2.03597	0.0390297
LRRC26	0.675907	0.496808	0.91957	0.0126386
LOC643550	19.7063	1.68326	230.706	0.0175578
SLC9A3R1	0.707496	0.511487	0.978617	0.0365683
PTPN20	0.615245	0.384791	0.98372	0.0425079
LOC641806	15.1051	1.53588	148.555	0.0199185
LOC646496	22.8157	1.60913	323.502	0.020802
SIGLEC7	29.5512	1.59763	546.604	0.0229236
SLC25A4	0.563921	0.32075	0.991446	0.0466123
TSPO	0.537936	0.297991	0.971086	0.0396556
SHROOM2	0.337073	0.161639	0.702913	0.00373053
LOC727851	27.1332	2.39933	306.839	0.0076496
ADAMTS5	3.05892	1.09608	8.53676	0.0327478
NPR2	59.9908	3.85436	933.722	0.00346323
TCF19	0.210928	0.0494479	0.899743	0.0354914
GAL	1.53488	1.14427	2.05882	0.00424463
SRI	3.8606	1.22186	12.1979	0.0213726
LOC286297	10.3738	1.16462	92.4044	0.036034
RAI14	1.50369	1.12769	2.00505	0.0054606
HOOK2	0.381184	0.177593	0.818171	0.0133259
FLJ44606	0.0121094	0.000644995	0.227346	0.0031778
ERMN	8.69167	1.08805	69.4318	0.0413944
LOC644348	11.3344	1.16435	110.334	0.0365264
CXCL2	1.32235	1.0164	1.72039	0.0374248
LOC643452	0.331181	0.129306	0.848225	0.0212783
FANCA	0.0573165	0.00615014	0.534164	0.0120539
C20ORF151	0.196218	0.0440057	0.874921	0.0327483
LOC653034	17.2122	1.34351	220.512	0.0287501
LOC401242	180.76	7.12096	4588.44	0.00163484
SLC26A9	0.523229	0.282152	0.970289	0.0398128
FAM22F	23.853	1.13416	501.663	0.0412538
CYP2C18	0.761583	0.597744	0.970329	0.0275478
ZNF281	2.25994	1.21998	4.18642	0.00953967
FTH1	1.58214	1.12488	2.22528	0.00838615
LOC644694	14.3573	1.20522	171.033	0.0350631
GSS	0.466726	0.222765	0.977861	0.0434571
SLC6A4	0.0886656	0.00843656	0.931847	0.0435103
UBE2Q2	1.6091	1.00275	2.58209	0.0486836
LOC651100	37.8049	1.13123	1263.41	0.0424751
GPR146	13.8548	1.07545	178.487	0.0438267
TRIM45	0.138157	0.0338423	0.564005	0.00581718
PLOD1	1.64664	1.11653	2.42843	0.0118679
PXN	1.95656	1.09315	3.50194	0.0238317
LOC652128	11.9623	1.22391	116.918	0.0328694
C1QTNF9	0.0270982	0.00116894	0.628186	0.0244584
SPAG4	2.4147	1.11215	5.24279	0.0258342
C20ORF26	18.8028	1.26753	278.924	0.0329861
KAZALD1	0.201631	0.0661886	0.614228	0.0048395
LOC647103	24.5673	1.00925	598.024	0.0493431
CLDN10	0.500023	0.322329	0.775674	0.00197562
MCAM	3.86337	1.08964	13.6978	0.0363583
TPM1	3.25042	1.1669	9.05411	0.0241163
PIGR	0.724303	0.549083	0.955439	0.0224568
ALG8	2.02162	1.10181	3.70931	0.0230239
COL8A1	1.44466	1.0788	1.9346	0.0135477
TMCC3	3.23215	1.30407	8.01094	0.0113012
KLRF1	5.65617	1.32478	24.1491	0.0192975
NPTX2	1.40623	1.06536	1.85617	0.0160866
FAM3B	0.145982	0.0236611	0.900662	0.0382042
POLDIP3	0.0395293	0.0019243	0.812018	0.0361714
WDR34	0.473506	0.243741	0.919859	0.0273479
DNAJC24	3.35413	1.17341	9.58759	0.0239217
THBS1	1.46194	1.16765	1.83039	0.000928102
HLX	41.3626	3.25878	525	0.00408948
ST5	3.09516	1.04552	9.16292	0.0413147
VCAN	1.27363	1.01749	1.59424	0.0347429
MAGEA4	1.79656	1.17656	2.74329	0.00667108
LOC646207	19.1566	1.08652	337.753	0.0437334
JMJD8	0.365691	0.182664	0.732111	0.00450544
COIL	0.351284	0.13455	0.917135	0.0326281
TREM1	1.96573	1.32818	2.90932	0.000728122
THOC4	40.4142	2.25103	725.581	0.0120506
ZNF195	2.62093	1.0042	6.84056	0.0490077
FBXL2	2.16751	1.04722	4.48623	0.0371337
ZEB2	1.96756	1.12741	3.4338	0.0172168
LOC391025	15.6128	1.29118	188.788	0.0307018
LOC646254	17.6531	1.41065	220.915	0.025959
RASL10A	130.795	3.98925	4288.34	0.00620057
DTX1	2.70222	1.02185	7.14586	0.0451202
GABRP	0.777858	0.638878	0.947073	0.0123685
APLN	2.97079	1.34478	6.56284	0.00709175
CCRN4L	1.47638	1.02065	2.1356	0.0385923
PMS2L1	0.171758	0.0366356	0.805249	0.0254349
KIAA1843	33.4868	2.14738	522.202	0.0122359
C5AR1	1.91608	1.12967	3.24994	0.0158546
CD81	2.52104	1.27229	4.99543	0.00804524
KIAA1432	273.945	16.4579	4559.88	9.15e-05
LOC648287	48.4694	1.93608	1213.42	0.0181734
TM7SF2	0.636992	0.442482	0.917005	0.0152649
LOC402693	35.746	1.5604	818.876	0.0251918
B3GALT4	0.344884	0.155217	0.766314	0.00896536
C21ORF34	0.65394	0.430103	0.994269	0.0469391
SNRPB2	2.47778	1.1999	5.11658	0.0141846
MKL2	0.235022	0.100303	0.550685	0.000858504
CMIP	39.1009	2.65978	574.816	0.0075114
MAST2	5.53423	1.5798	19.3871	0.00747501
TEX11	19.4652	1.60139	236.603	0.019835
LOC729692	11.7416	1.24496	110.738	0.0314498
PIGN	0.511357	0.299388	0.873402	0.0140669
RNF122	8.38316	2.64397	26.5802	0.00030457
OTX1	0.373314	0.182944	0.761783	0.00677572
CAP2	1.53653	1.03104	2.28984	0.0348469
LOC651536	31.2366	2.02333	482.238	0.0137144
ZNF57	0.195101	0.0385618	0.987105	0.048194
PRDM4	2.61712	1.19106	5.75062	0.0166081
C15ORF5	3.2416	1.17198	8.96602	0.0234706
PLAUR	2.18465	1.34636	3.54488	0.00155509
LOC644736	37.388	1.45216	962.613	0.0288848
C3ORF60	37.7768	2.40076	594.432	0.00979991
DAZL	56.8281	2.43401	1326.8	0.0119588
LOC647713	18.7694	1.18174	298.112	0.0376796
RHBDF2	1.75276	1.03775	2.96042	0.0358571
DACT2	0.524194	0.339869	0.808485	0.0034825
G0S2	1.52541	1.05128	2.21339	0.0261991
LOC648039	56.1211	2.68471	1173.15	0.00941268
STC2	1.57681	1.13619	2.18829	0.00645765
SPANXN3	0.111979	0.0159356	0.786875	0.0277428
TBX6	0.0348324	0.00137224	0.884175	0.0418945
LCN2	0.812433	0.699412	0.943718	0.00656931
DOK3	13.5036	1.25384	145.43	0.0318325
LOC260339	257.258	5.88488	11246.1	0.00398278
B4GALT3	2.71791	1.32346	5.58161	0.00646431
ELK3	6.0808	1.78132	20.7577	0.00395638
TTYH3	1.6263	1.05246	2.51301	0.0285078
DENND3	1.87806	1.09017	3.23538	0.0231427
BICD1	10.0787	1.12707	90.1282	0.0387359
VTI1B	1.8972	1.02311	3.51807	0.0421064
SUSD2	1.58999	1.10301	2.29196	0.0129383
POMP	2.76852	1.22711	6.24614	0.0141684
C6ORF162	0.108309	0.0196737	0.596267	0.0106461
P4HA1	1.64208	1.12885	2.38864	0.00949097
NOXO1	0.0407432	0.0030323	0.547443	0.0157568
CD300A	2.21784	1.1208	4.38869	0.0221691
TRDN	24.7814	2.10812	291.309	0.010676
LACTB	7.55175	1.56448	36.4523	0.0118296
IGSF9	0.665757	0.459007	0.965634	0.0320101
WNT2	2.22829	1.04714	4.74174	0.0375705
GPD1L	0.701561	0.495866	0.992584	0.045284
C21ORF84	47.2139	1.77584	1255.27	0.0212745
NFIX	0.712473	0.509175	0.996941	0.0479471
MAP3K6	0.593711	0.360632	0.97743	0.0403922
KIAA0194	2.82098	1.26708	6.28052	0.0110969
GCHFR	0.552483	0.326778	0.934082	0.0267965
PYDC1	0.107096	0.0128155	0.894966	0.0391689
IL20RA	0.373176	0.166796	0.834917	0.0164357
CA4	4.55444	1.31348	15.7923	0.0168584
FERMT2	1.48796	1.09295	2.02572	0.0115821
FOXP2	0.0489995	0.00530888	0.452253	0.00781952
ASF1B	0.607192	0.386142	0.954784	0.0307481
CD9	0.661885	0.472099	0.927964	0.0166834
C9ORF109	15.9567	1.47781	172.292	0.0225077
CIT	0.144999	0.0228365	0.920657	0.040597
DCBLD1	1.33712	1.00732	1.7749	0.0443887
PDIA5	2.04292	1.24782	3.34465	0.00450854
NCOA6	0.44532	0.201	0.986615	0.0462434
TTYH2	4.10563	1.00851	16.714	0.0486333
MEIS2	0.420848	0.247856	0.714579	0.00135491
C21ORF63	0.556022	0.360829	0.856806	0.00780326
C12ORF8	0.0511997	0.00279895	0.936567	0.0450533
C13ORF33	2.24288	1.21592	4.13723	0.0097158
STRN4	0.326013	0.117786	0.90235	0.0309449
DKFZP451M2119	0.487654	0.294507	0.807473	0.00525339
CTSB	1.50265	1.0548	2.14064	0.0241044
SFRS2	0.440537	0.19816	0.979376	0.0443161
BRD7	0.42521	0.22533	0.802395	0.00830371
KLK1	0.222251	0.0654891	0.754259	0.0158512
FGF23	39.1117	3.35852	455.475	0.00342025
AHSP	20.3954	2.96862	140.123	0.00216543
SLC38A6	2.24648	1.13129	4.46097	0.0207546
TLN1	2.05872	1.12303	3.77401	0.0195326
LOC647134	251.042	11.1112	5671.96	0.000513233
GPR182	12.6253	1.17622	135.516	0.0362602
PARS2	0.170165	0.0327974	0.882874	0.0350085
FTHL8	1.61425	1.07323	2.428	0.0214882
LOC646256	23.1569	1.08614	493.714	0.0441257
CYP46A1	20.2853	2.6453	155.556	0.00378064
SLC25A29	0.15049	0.0459333	0.493047	0.00176064
PLA2G4B	0.642803	0.444342	0.929903	0.01899
ZNF517	19.2193	1.05852	348.963	0.0456721
TSTA3	1.83118	1.02933	3.25769	0.0395601
LOC654244	0.396348	0.161513	0.972623	0.0433243
CXORF38	3.10312	1.28407	7.49912	0.0118915
RHOV	0.469967	0.240317	0.919076	0.0273447
AACS	0.452976	0.205324	0.999332	0.049807
NID2	2.31026	1.4052	3.79823	0.000963308
ATP10B	0.759606	0.590392	0.97732	0.0324857
LOC654114	36.117	2.79846	466.127	0.00598611
C21ORF7	2.54824	1.37974	4.70635	0.00280533
C14ORF118	8.69878	1.00002	75.6676	0.0499983
MSMB	0.688671	0.515629	0.919786	0.0115275
TPD52L2	2.2044	1.19264	4.07447	0.0116667
CCT6B	0.341015	0.133568	0.87065	0.024474
IL6	1.26445	1.03117	1.5505	0.0241397
ABHD9	0.723013	0.573624	0.911307	0.00602449
PDE8A	3.10903	1.03611	9.32913	0.0430481
CTGF	1.291	1.02011	1.63383	0.033531
IGF2	9.06689	1.49826	54.8693	0.0163897
BNIPL	0.804851	0.656309	0.987012	0.037019
WDR86	2.83182	1.39058	5.7668	0.00412241
HOXA1	51.6493	1.41794	1881.35	0.0315288
KIAA1522	0.479567	0.275747	0.834042	0.00924994
SIM2	0.458764	0.249788	0.842574	0.0119975
CHST9	0.395402	0.212232	0.736661	0.00347042
ZNF750	0.749401	0.593233	0.94668	0.0155406
CD99L2	2.11817	1.02857	4.36203	0.0417116
VAT1	1.98516	1.15209	3.42061	0.013513
KLF6	1.98452	1.03791	3.79447	0.0382197
KRTCAP3	0.649364	0.458541	0.919599	0.0150113
ENSA	0.358847	0.137184	0.93867	0.0367104
EPHX1	0.585947	0.370757	0.926034	0.0220771
COL1A1	1.24247	1.03964	1.48487	0.0169664
IKBIP	3.35496	1.26472	8.89981	0.0150249
RARRES3	0.73325	0.579389	0.927972	0.0098209
GDPD5	1.96778	1.03503	3.74109	0.0389222
UQCRFS1	0.335828	0.157261	0.717157	0.00482001
AXL	1.5444	1.03254	2.31	0.0343584
CD300C	7.27758	1.53178	34.5762	0.01255
SNCA	0.707387	0.50395	0.992949	0.0454074
SLC9A4	0.0909332	0.0116481	0.709889	0.0222094
C1ORF54	1.81957	1.16633	2.83867	0.00833861
ALDH3A1	0.814077	0.712541	0.930083	0.00247533
C17ORF48	2.65086	1.01106	6.95021	0.0474426
RETSAT	0.477966	0.228663	0.999075	0.049713
LOC645558	38.5701	1.44351	1030.58	0.0293354
TMEM166	1.29469	1.00776	1.66332	0.0433417
LOC731777	3.04074	1.05192	8.78979	0.0400321
SCG2	1.61427	1.13504	2.29583	0.00770214
MAP1LC3B	2.03641	1.02629	4.04075	0.0419335
TWF2	2.61828	1.19633	5.73037	0.0160174
LOC441763	2.54717	1.16862	5.55192	0.0186765
LATS2	4.1812	1.34225	13.0248	0.0135986
ARHGEF2	1.72822	1.0982	2.71967	0.0180361
S1PR3	2.15546	1.29457	3.58883	0.00315199
AHSA1	2.51548	1.40832	4.49305	0.00182786
ANXA7	0.528159	0.285587	0.97677	0.0418621
FAM21B	25.4781	1.63524	396.964	0.020834
SULT1E1	0.0711898	0.00730175	0.694078	0.0229505
FXYD5	1.70799	1.22391	2.38354	0.00164263
LOC389435	2.22894	1.04131	4.77111	0.0389983
IGSF3	0.637768	0.434658	0.935788	0.0214926
USP27X	49.2377	1.31402	1845	0.0350591
PSMD13	3.75593	1.20315	11.725	0.0227038
SERINC4	162.935	4.31183	6156.95	0.00598554
ABCA13	0.719361	0.552367	0.936842	0.0145237
C4ORF12	54.592	1.59126	1872.91	0.0265896
FADS6	15.9105	2.11719	119.566	0.00716912
MYPOP	0.365274	0.164841	0.809416	0.0131084
SEH1L	0.448696	0.228098	0.882639	0.0202539
NUMB	2.99533	1.43815	6.23861	0.00338301
LOC201140	24.0176	1.47126	392.075	0.0256845
GRASP	3.09201	1.10583	8.64558	0.0314199
TMEM110	13.3388	1.11853	159.069	0.0405074
CYP2S1	0.734459	0.54365	0.992238	0.0443539
LOC651450	0.0421554	0.00187801	0.946258	0.0460686
NAT10	2.13526	1.13306	4.0239	0.0189574
MEIS1	0.558469	0.331741	0.940154	0.028366
ADAM12	18.4842	1.93607	176.474	0.0112813
LOC645946	0.00334547	9.74e-05	0.114921	0.00158335
FLJ10357	10.8042	1.17148	99.6436	0.0357652
KRT80	0.781235	0.638325	0.956142	0.0166177
FTHL11	1.71016	1.08026	2.70738	0.0220605
ICK	0.084537	0.0118373	0.603728	0.0137755
RFX2	0.167154	0.0364012	0.767572	0.0214433
UGT1A6	0.705863	0.53127	0.937832	0.0162751
DSE	1.61704	1.10769	2.3606	0.0127807
COL5A1	1.33145	1.08853	1.62859	0.00534798
TEF	0.380506	0.174257	0.830869	0.0153101
SHBG	22.4324	1.38863	362.382	0.0284335
PLEKHA9	2.45489	1.15027	5.2392	0.0202374
COL6A3	1.34805	1.07026	1.69796	0.0111916
MAPK1	0.257043	0.0753535	0.876816	0.0300112
EPPK1	30.7424	1.33467	708.111	0.0323279
CD200	14.1907	1.40439	143.389	0.0245929
REV1	0.44929	0.215904	0.934961	0.0323688
SALL3	0.125503	0.0164434	0.957883	0.0453428
AGMAT	0.0212687	0.000860889	0.525455	0.018611
SLC1A5	0.583605	0.346593	0.982695	0.0428035
MAP4	1.73693	1.02005	2.95764	0.042048
EHF	0.691547	0.543989	0.879132	0.00259565
BHLHB9	0.391174	0.154718	0.989003	0.0473305
LOC644423	3.61863	1.0584	12.372	0.0403202
PAK6	0.569594	0.339899	0.954508	0.0326208
ARL6IP1	0.494022	0.265698	0.918552	0.0258515
NFATC2IP	0.10176	0.0119214	0.86861	0.0367332
RWDD4A	0.444414	0.228669	0.863708	0.0167503
LOC652789	63.3682	3.33047	1205.69	0.00577248
MFAP3	2.85188	1.08877	7.47009	0.0329182
NCOA3	2.22479	1.17336	4.21841	0.0142967
MEIG1	15.3316	1.11587	210.65	0.0411544
C6ORF145	4.19072	1.00678	17.444	0.0489248
AKAP13	2.86556	1.1264	7.28997	0.0271183
PRR16	2.59591	1.02341	6.58465	0.0445708
CXORF50	18.4302	1.49324	227.473	0.0230461
CLEC4A	2.60897	1.34486	5.06128	0.00456391
EPHX2	0.621759	0.412883	0.936303	0.0229022
CDH12	0.325873	0.109833	0.966866	0.0433119
GPSM1	1.48852	1.04135	2.12771	0.0290907
LOC653093	35.8537	1.14687	1120.86	0.041551
LRRC15	4.59429	1.36953	15.4122	0.0135417
TMEM181	2.18205	1.14245	4.16768	0.0181119
ZBTB46	1.90303	1.04602	3.46218	0.0350897
MFSD6	0.531738	0.34408	0.821745	0.00445549
TUBB1	23.5431	4.66279	118.872	0.000131531
PARD3	0.1197	0.0299287	0.478744	0.00268691
MIPOL1	0.110748	0.0142656	0.859775	0.0353389
LOC339742	36.1694	1.05433	1240.82	0.0466689
LOC653061	0.530539	0.3129	0.899558	0.0186285
DNAJC21	0.259686	0.0867437	0.777426	0.0159532
LOC728044	13.6478	1.60077	116.358	0.0168371
CREB3L4	0.328129	0.112141	0.960117	0.0419251
EMILIN1	1.84224	1.06528	3.18587	0.0287975
LOC652565	67.5474	3.11085	1466.69	0.0073043
ZP4	4.93748	1.19862	20.339	0.0270507
NFE2	1.92993	1.19578	3.1148	0.00710098
SLC25A24	1.44987	1.0808	1.94497	0.0131999
MED24	0.442574	0.213815	0.916084	0.028085
ENOPH1	0.515343	0.268329	0.989749	0.046491
MXD3	0.375859	0.157466	0.897144	0.0274905
TMEM115	2.53363	1.09013	5.88857	0.0307334
GCNT3	0.709072	0.569139	0.88341	0.00217516
LOC644733	0.332444	0.116176	0.951307	0.0400704
AKAP1	0.365061	0.169205	0.78762	0.0102146
RAB40C	0.436576	0.249465	0.764029	0.00370113
LOC642325	47.9121	2.90485	790.253	0.00681763
HSPH1	1.62026	1.08384	2.42217	0.0186525
AES	0.540623	0.315384	0.92672	0.0253037
PGCP	2.15889	1.12634	4.13801	0.0204297
RPL27A	2.2918	1.04734	5.01494	0.0379193
MSI2	0.452504	0.214197	0.955941	0.037705
TCP11L1	2.15654	1.02226	4.54939	0.0436146
FAM160A2	5.40737	1.84606	15.839	0.00208397
C20ORF103	1.54516	1.01016	2.36352	0.0447967
IL34	0.18455	0.0442353	0.769942	0.0204115
SCNN1A	0.672269	0.552966	0.817312	6.78e-05
ST3GAL2	3.87869	1.60773	9.35745	0.00255546
LOC283487	58.0682	4.70324	716.934	0.00153853
TSC2	0.30042	0.113608	0.794416	0.0153575
GLCE	0.485451	0.283554	0.831103	0.00843004
VGLL3	3.18207	1.26193	8.02385	0.0141681
C20ORF107	26.6444	1.23838	573.267	0.0360364
OLFM1	0.729657	0.549084	0.969615	0.0298051
YIPF5	2.41738	1.22252	4.78007	0.0111631
LOC646638	32.4877	3.62518	291.145	0.00186435
CD68	1.61392	1.03244	2.52288	0.035725
AQP9	1.30168	1.02473	1.65347	0.0307612
IVNS1ABP	3.82325	1.59712	9.15225	0.00260177
PYCR1	0.0831913	0.0113482	0.60986	0.0144244
SCYE1	0.0151638	0.000777972	0.295566	0.00570409
NNMT	1.57227	1.17057	2.11182	0.00264495
LOC441191	18.7354	3.22078	108.985	0.00110672
BOP1	1.57427	1.06762	2.32136	0.0220112
FLNC	1.25714	1.03627	1.52508	0.0202663
FBXL17	0.0271584	0.00238548	0.309194	0.00366298
ARMCX6	0.539437	0.302453	0.962109	0.0365448
CBL	2.51897	1.08984	5.82219	0.030679
ANKRD1	1.54208	1.07376	2.21465	0.0190098
PGM2L1	2.22288	1.18605	4.16612	0.012691
ATL2	0.52516	0.30195	0.913374	0.0225573
SORBS2	0.589318	0.399041	0.870326	0.00785763
PTPN6	22.299	1.05312	472.167	0.0462406
NGF	2.08168	1.01916	4.25193	0.0442152
CEBPG	0.527288	0.280899	0.989796	0.0463838
TDO2	1.39572	1.05588	1.84495	0.0191862
LOC654342	2.87306	1.2702	6.49857	0.0112672
ZNF618	2.08449	1.00117	4.34	0.0496345
MMP25	1.79615	1.09073	2.95779	0.0213783
C9ORF66	4.44556	1.03907	19.0199	0.0442574
RGMA	0.69048	0.497518	0.958284	0.0267755
PEPD	0.392209	0.211645	0.726819	0.00294195
KCNK17	0.0936014	0.00978264	0.895589	0.0398149
DGKE	0.0883758	0.0130383	0.599025	0.0129623
CALD1	1.43893	1.07431	1.9273	0.0146576
OTOR	24.8258	1.25258	492.043	0.0350526
SMC3	0.532786	0.284099	0.999164	0.0496961
PLCL1	3.68733	1.05737	12.8587	0.0406098
C5ORF46	1.83219	1.18101	2.84241	0.00688181
TSHZ1	0.327126	0.146757	0.729173	0.00629024
C14ORF49	23.0602	1.04503	508.856	0.0468263
GADD45B	1.45981	1.05063	2.02836	0.0241809
FCGBP	0.641437	0.449922	0.914471	0.0141236
LOC643424	14.9415	1.68453	132.528	0.015172
IBSP	5.32327	1.52017	18.6408	0.00892386
SLC44A4	0.287303	0.122947	0.671373	0.00397684
INHBA	14.008	1.13085	173.52	0.0398087
LOC441081	0.0410164	0.00181791	0.925428	0.0445683
OSCP1	0.28031	0.0800994	0.980954	0.0465853
HADH	0.527004	0.336495	0.825372	0.00513509
FAM3D	0.708592	0.556905	0.901595	0.00506581
POLR2I	0.450899	0.234223	0.868018	0.0171478
LRCH2	3.40225	1.54438	7.49508	0.0023775
OR2T6	24.2826	1.02978	572.593	0.0479105
CSNK1D	2.20582	1.16991	4.15901	0.0144871
TECR	0.546505	0.327932	0.910759	0.0204122
C6ORF115	1.68977	1.00675	2.83618	0.0470967
PTMS	0.593834	0.363239	0.970819	0.0377044
MOBKL2A	2.09267	1.14563	3.82261	0.0162954
LOC646223	46.8447	2.10878	1040.62	0.0150332
LOC387790	17.8616	2.23207	142.933	0.00659446
ADAMTSL2	1.81119	1.08012	3.03708	0.0243087
C12ORF40	85.7212	3.43439	2139.57	0.00669546
C19ORF73	0.0194807	0.00162209	0.233957	0.0019006
PAPPA	1.68858	1.08948	2.61711	0.0191141
ARD1A	2.35528	1.29836	4.27257	0.00481382
LOC642449	0.164488	0.0337384	0.801944	0.0255468
MAGEE1	54.7074	2.63947	1133.9	0.00966777
C9ORF126	0.0939668	0.0128229	0.688594	0.0199589
TFF1	0.364874	0.147487	0.902677	0.0291455
RICS	0.686512	0.478138	0.985695	0.0415463
ROGDI	0.261328	0.100924	0.676671	0.00569987
GJA5	18.3532	1.28197	262.752	0.0321217
HLF	0.316199	0.171937	0.581502	0.000212181
CCDC36	121.578	4.40551	3355.18	0.00456861
TLR5	0.603726	0.373879	0.974876	0.0390139
OLR1	1.37361	1.05127	1.79477	0.0199973
CRB3	0.550663	0.341092	0.888999	0.0146293
GPD2	0.434257	0.222276	0.848403	0.0146432
PALB2	0.392386	0.163235	0.943223	0.0365649
FLJ32011	22.1251	1.42398	343.768	0.0269324
SLC6A17	11.6589	1.09243	124.43	0.0420381
KDELR2	1.7836	1.12454	2.82892	0.0139443
LOC653711	43.0616	1.36338	1360.08	0.0326859
SLC25A35	0.0802897	0.0140252	0.459632	0.00460907
LOC399744	5.07272	1.22753	20.9627	0.024887
COL4A2	1.90575	1.3231	2.74497	0.000532642
LOC645118	40.8352	1.46861	1135.44	0.02878
GCGR	0.527787	0.297228	0.937191	0.0291548
SNAPC1	4.91771	1.14152	21.1856	0.0325497
TMEM200A	1.92572	1.23175	3.01068	0.00405088
LOC441698	204.726	7.83052	5352.48	0.00139394
KCNAB2	37.2652	1.42237	976.326	0.0298998
LRRC1	0.308986	0.127562	0.748439	0.00927041
AMIGO2	0.019981	0.000576224	0.692858	0.0305586
ITGAX	9.98275	1.11934	89.0307	0.0393083
THSD4	0.343175	0.123144	0.956351	0.040824
METTL9	0.298857	0.0977	0.914181	0.0342382
MMP1	1.22631	1.04851	1.43425	0.0106894
SEL1L	2.31443	1.00186	5.34661	0.0494931
CHODL	0.427732	0.192921	0.94834	0.03657
YPEL4	21.4236	1.09056	420.855	0.0436928
COPS4	0.466972	0.229197	0.95142	0.0359837
EPN3	0.456827	0.264926	0.787732	0.00482859
TCEA3	0.690763	0.523853	0.910853	0.00875087
DDX46	0.438863	0.196269	0.981309	0.0448649
SFTPB	28.1633	1.35789	584.12	0.0309495
C17ORF37	0.325339	0.129826	0.81529	0.0165912
SMARCD1	0.0336484	0.00185613	0.609988	0.021771
CALU	1.77493	1.16963	2.69349	0.00701163
MAOB	0.500345	0.282007	0.887728	0.0179303
CDC16	1.94952	1.00108	3.79649	0.0496286
L3MBTL3	2.46252	1.2326	4.91966	0.0107036
OLIG2	11.8509	1.46875	95.6223	0.0202976
ZNF827	0.551622	0.336065	0.90544	0.0186308
MOSPD1	3.00574	1.20377	7.50514	0.0184135
FPGT	0.0252885	0.00109178	0.585747	0.0218161
SBK1	0.627618	0.399294	0.986501	0.0435013
PUM2	0.45363	0.217885	0.944442	0.0346228
C21ORF119	0.180184	0.0433336	0.749214	0.0184196
C12ORF45	3.33234	1.12489	9.87164	0.0298288
GHITM	0.421899	0.186833	0.952715	0.037846
FCGR3B	1.62995	1.07761	2.46538	0.0206673
GDE1	0.307236	0.114794	0.822291	0.0187987
SPTY2D1	2.90772	1.04867	8.06249	0.0402393
C5ORF4	0.271115	0.0880476	0.834814	0.0229297
GPR116	1.64134	1.13225	2.37932	0.0089069
NR2C1	2.35983	1.03019	5.40561	0.0423259
PDZD2	0.582292	0.341068	0.994123	0.0475283
COL5A2	1.3352	1.07241	1.66239	0.00973525
GATM	0.569441	0.366249	0.885362	0.0123954
TPP1	2.76074	1.58617	4.80509	0.000328746
LOC649754	15.5633	1.29603	186.891	0.030431
LIPH	0.214117	0.0527793	0.868638	0.0310007
MFSD4	0.0237883	0.00139298	0.406238	0.00981908
RNF216	3.69968	1.62693	8.4132	0.00180205
GSTT1	0.701349	0.546904	0.899409	0.00518419
TMC5	0.35267	0.146058	0.851555	0.0204908
TAS2R43	73.6303	1.7119	3166.91	0.0250851
GCLC	0.627106	0.437148	0.899606	0.0112569
LOC441061	7.02776	1.43298	34.4662	0.0162434
FSTL3	1.67326	1.23311	2.27052	0.000948228
KRT19	0.875866	0.772405	0.993185	0.0387738
KRT18	0.0144838	0.000582182	0.360336	0.00981104
CLEC18C	0.108378	0.015299	0.767747	0.0261117
RAD52	73.6042	2.1192	2556.42	0.0175542
DPEP3	4.2745	1.375	13.2883	0.0120643
GPR156	18.7088	1.28918	271.505	0.0318671
MARCO	2.16009	1.14204	4.08566	0.0178646
PAX9	0.615384	0.41746	0.907147	0.0142003
DCLK1	28.6229	2.38492	343.522	0.00815755
ATP1A1	0.47622	0.293402	0.772951	0.00268082
SCYL1	2.24113	1.03577	4.84923	0.0404421
FLJ42875	0.0281237	0.001047	0.755441	0.0334197
CKMT1A	0.705761	0.539233	0.923717	0.011154
MRI1	0.508295	0.282929	0.913176	0.0235855
COL6A1	1.29292	1.02941	1.62388	0.0271597
LOC652685	3.01358	1.45084	6.25961	0.00309871
SCGB2A1	0.478579	0.270137	0.84786	0.0115508
HSPA4L	0.625662	0.41692	0.938915	0.0235553
LOC253820	25.7459	1.86535	355.349	0.0152876
SEC14L1	4.95257	1.4582	16.8207	0.0103292
FLJ26850	0.0244374	0.00147733	0.404234	0.0095238
KIAA1949	1.96478	1.24017	3.11277	0.00401718
LOC285908	1.80487	1.08313	3.00753	0.0234229
CALML3	0.775056	0.634561	0.946657	0.0125189
LOC284988	1.99337	1.17302	3.38742	0.0107778
NDUFC1	0.487866	0.249798	0.952825	0.0356009
MPP1	1.77617	1.04017	3.03293	0.0353574
IMP3	0.337532	0.15568	0.73181	0.00594567
DACT3	1.89715	1.07328	3.35343	0.0275732
C20ORF114	0.835532	0.712556	0.979731	0.0269631
LOC642855	70.8017	3.0027	1669.46	0.00824554
DCLRE1A	0.210624	0.0738665	0.600574	0.00357186
PMEPA1	1.48523	1.14705	1.92311	0.00269368
MKI67	0.388567	0.151351	0.997582	0.0494146
IL22	0.0632989	0.00506672	0.790797	0.0321821
WDR22	2.014	1.01574	3.99335	0.0449968
NPNT	0.469602	0.221245	0.996751	0.0490176
KCNJ8	2.02458	1.14845	3.56906	0.0147491
LOC649909	38.3871	1.15626	1274.43	0.0412297
METTL2B	3.96328	1.26209	12.4457	0.0183414
NOX4	1.74925	1.17806	2.59739	0.00556446
ELL	3.8319	1.59175	9.22472	0.00272659
AEBP1	1.34825	1.04067	1.74675	0.0237157
GSTM3	0.662074	0.464287	0.944119	0.0227533
ALDH1L2	1.9724	1.1181	3.47943	0.0190051
PHACTR4	0.52332	0.294825	0.928904	0.0269757
LOC730050	12.3371	1.20908	125.885	0.033992
PAG1	4.95189	2.09315	11.715	0.000271303
SIGIRR	0.00921372	0.000298954	0.283966	0.0073686
PHACTR1	3.17832	1.22337	8.25729	0.0176041
TRAM1	2.5057	1.21223	5.17933	0.0131579
GRAMD1A	1.64201	1.0002	2.69564	0.0499055
THTPA	0.0302292	0.00286907	0.318503	0.00358845
C8G	0.358785	0.135082	0.952952	0.0397195
TSPYL3	0.426168	0.218689	0.830491	0.0122244
ACSL6	46.5215	1.96152	1103.35	0.0174534
LOC347364	21.9452	1.28853	373.752	0.0327433
RARG	0.0159856	0.000381427	0.66996	0.0299979
ABHD11	0.108378	0.0146625	0.801082	0.0294598
PER2	0.616215	0.398509	0.952854	0.0294712
C2ORF34	0.272628	0.110156	0.674733	0.00494029
TREML3	2.78625	1.23981	6.26162	0.0131287
TUFM	0.371739	0.160647	0.860206	0.0207918
LOC647346	0.548621	0.31702	0.949417	0.0319159
SATB2	2.42386	1.1354	5.17448	0.0221297
POU4F1	0.382583	0.156953	0.93257	0.0345555
SACS	5.61016	1.08055	29.1278	0.0401555
TSSK2	178.34	3.59545	8845.95	0.00925726
SLC9A2	0.476764	0.27212	0.835307	0.00962761
ACAA1	2.31939	1.08604	4.95338	0.0297668
LOC642995	19.3466	1.88788	198.26	0.0125895
MNDA	2.15622	1.181	3.93673	0.0123633
TACSTD2	0.538766	0.378415	0.767065	0.000601057
LOC647009	0.30473	0.122241	0.75965	0.010778
LSAMP	2.3509	1.17883	4.68833	0.01522
TM4SF18	3.17008	1.42801	7.03733	0.00457376
IFIT2	1.31491	1.03471	1.67099	0.0251542
CRELD1	1.81897	1.03067	3.21019	0.0389987
LYPD3	0.778026	0.627955	0.963962	0.0216952
PPP1R12A	3.47202	1.19276	10.1068	0.0224125
LOC646762	16.284	1.31515	201.627	0.029754
RHOG	1.90546	1.12336	3.23209	0.0167829
NDE1	0.596226	0.362744	0.979991	0.0413819
EIF2S1	3.01988	1.29264	7.05507	0.0106841
MYOD1	68.0456	3.10792	1489.81	0.00735998
UGT1A10	0.558257	0.32937	0.946204	0.0303592
SIGLEC5	13.8765	1.15192	167.163	0.0383268
CDC25B	17.0416	1.93343	150.208	0.0106584
LOC728811	0.335324	0.117308	0.958516	0.0414471
SGMS1	0.30475	0.0989	0.939056	0.0385015
RAB11FIP5	1.95028	1.00819	3.77271	0.0472346
RTKN2	0.211952	0.0537317	0.836075	0.0267148
GRB7	0.33279	0.167777	0.660098	0.00164027
TREML2	17.0108	1.37589	210.314	0.0271979
FPR2	1.6042	1.054	2.44161	0.0274266
SCNN1B	0.551875	0.360976	0.84373	0.00606039
MACROD1	0.457262	0.222359	0.94032	0.0333993
SLC11A1	1.63741	1.16563	2.30015	0.0044576
MSC	2.05505	1.22048	3.46029	0.00673971
FUT8	1.96978	1.12788	3.44009	0.0171728
MAGEA10	1.21188	1.01331	1.44935	0.0353058
AKAP8	0.194476	0.0462645	0.817497	0.0254167
SERINC1	2.68659	1.38707	5.20361	0.00338938
RAB3IL1	1.79019	1.12422	2.85067	0.0141573
LOC646769	5.42285	1.45244	20.2469	0.0118942
SMPD1	7.37082	1.23759	43.8991	0.0282279
OSCAR	3.2473	1.18563	8.89393	0.0219517
LOC643841	25.1064	1.15575	545.389	0.0401577
GDPD4	54.4812	2.21603	1339.42	0.0144048
C8ORF76	2.2543	1.04764	4.85076	0.037617
PLXNB1	0.480104	0.273587	0.84251	0.0105517
LOC654055	79.4539	3.65245	1728.41	0.00536348
C6ORF138	22.1314	2.05051	238.866	0.0107231
BAT4	0.0438297	0.00370186	0.51894	0.0131321
PWP1	2.65472	1.08192	6.51392	0.0330155
LOC644929	157.037	5.97978	4124	0.00242534
SH3RF3	2.50977	1.0797	5.83394	0.0325042
FAM109A	7.86422	1.77611	34.821	0.00659487
PIGW	0.401206	0.173754	0.9264	0.0324343
LOC441150	0.282451	0.0954822	0.835532	0.0223315
SHMT1	0.0606229	0.00945841	0.388557	0.00310366
TSHZ3	1.6728	1.07946	2.59229	0.0213318
IGFL1	1.23941	1.02547	1.49798	0.0264086
ASTN2	0.435173	0.270602	0.699831	0.000598278
PLA2G4F	0.650461	0.434089	0.974685	0.0371397
SERPINE1	1.3012	1.06246	1.5936	0.0109047
DLG5	0.300016	0.116358	0.773558	0.0127289
KCNN3	7.36504	1.22292	44.3561	0.0292845
PTPRM	1.73077	1.08735	2.75493	0.020719
PARD6B	10.8897	1.82659	64.9216	0.00875867
CDC42EP4	0.690561	0.484369	0.984528	0.0407427
METTL2A	5.30792	1.11171	25.3429	0.0363724
CAGE1	27.8125	1.13158	683.586	0.0417871
FBXO21	0.428385	0.198326	0.925315	0.0309659
LOC389791	0.346494	0.131684	0.911715	0.0317765
GTF3C2	0.370732	0.169632	0.810237	0.0128654
FJX1	1.56426	1.06857	2.28987	0.0213869
FTHL2	1.68835	1.06055	2.68777	0.0272595
C9ORF25	2.95372	1.06431	8.19731	0.0375587
RORB	0.35937	0.1707	0.756572	0.00705159
CGN	0.560638	0.365775	0.859313	0.00791144
C5	0.526302	0.301067	0.920043	0.0242977
LOC729843	0.52807	0.288703	0.965901	0.0382117
CCDC11	0.228278	0.0550568	0.94649	0.0417751
SLC41A2	9.09507	2.38879	34.6285	0.00120988
C15ORF41	0.244047	0.107137	0.555911	0.000785584
CCL3L1	1.54993	1.11444	2.15559	0.00921986
C3ORF65	22.7477	1.07254	482.46	0.0449738
BMP6	2.24394	1.19702	4.20652	0.011707
C10ORF37	46.8812	1.56572	1403.73	0.0265227
LHFPL2	1.71487	1.02027	2.88234	0.0417783
PAFAH1B3	0.556887	0.367032	0.844951	0.00592337
LOC253573	27.1728	1.33153	554.52	0.0318696
KCND2	3.63319	1.0301	12.8144	0.044848
LOC388564	0.609129	0.395752	0.937553	0.0242574
FUZ	0.101531	0.011092	0.929361	0.0428866
MRAS	7.32443	1.49132	35.973	0.0142009
PRR15L	0.435712	0.21885	0.86747	0.0180477
NECAP2	1.96906	1.00598	3.85414	0.0480007
RTN2	2.11906	1.01399	4.42846	0.0458345
CALML5	0.819649	0.690385	0.973116	0.0231363
VAT1L	5.51993	1.05982	28.7498	0.0424619
ZNF778	52.573	1.43445	1926.81	0.0310595
SLC35F1	30.5108	1.75746	529.693	0.0189168
LOC653796	73.3834	2.41512	2229.75	0.0136563
LOC649025	12.5697	2.41184	65.5088	0.00265429
FTHL12	1.8768	1.14633	3.07276	0.0123186
C17ORF62	2.10263	1.07473	4.11362	0.0299732
CERCAM	1.58909	1.02481	2.46409	0.0385042
ATP2B1	57.1122	1.45289	2245.05	0.0308207
SDSL	2.56192	1.4282	4.59558	0.00160254
SYTL1	0.541374	0.313195	0.935793	0.0279763
VAC14	17.6772	1.05595	295.926	0.0457352
LYZL6	42.5407	1.8295	989.183	0.0194791
DLX4	0.0876401	0.0160654	0.478095	0.00491614
C9ORF10OS	0.429095	0.18846	0.976984	0.0438596
SERPINH1	1.5149	1.14534	2.0037	0.0036018
SMAD2	0.068578	0.00475349	0.989366	0.0490894
LOC728070	59.2373	1.68021	2088.46	0.0247396
IRF2BP1	0.210761	0.0490414	0.905767	0.0363486
C16ORF30	2.61258	1.23886	5.50956	0.0116493
RAD23A	0.475968	0.242218	0.935293	0.0312357
SESN2	5.86023	1.69683	20.2392	0.00517212
ANKRD41	41.6286	1.43516	1207.49	0.0299891
MCTS1	2.21677	1.15507	4.25432	0.0166929
LOC728772	5.21785	1.56375	17.4107	0.00720628
RLBP1	24.6885	1.55759	391.325	0.0229487
FAM38A	1.60336	1.01463	2.53369	0.0431597
CXCL5	1.35538	1.0044	1.82901	0.0467357
TRIM23	3.25139	1.27705	8.27812	0.0134038
VWF	1.54178	1.08785	2.18513	0.0149671
GREM1	1.58346	1.17256	2.13834	0.00271286
VTCN1	0.705116	0.505831	0.982914	0.0392406
LOC124220	0.676313	0.506654	0.902783	0.00795474
ABTB2	3.09289	1.31747	7.26083	0.00950892
LRRC23	0.238439	0.0637609	0.891666	0.0331426
CD63	1.67208	1.06269	2.6309	0.0262228
PRR4	0.811702	0.667964	0.98637	0.0359078
DKFZP686J0529	3.69576	1.16163	11.7582	0.0268503
FRMPD4	0.00724787	0.000133919	0.392265	0.0155413
GINS3	0.399168	0.217658	0.732047	0.00299744
DAZ4	2.72212	1.02973	7.19597	0.0434833
ARHGEF17	3.59584	1.42267	9.08861	0.00682771
RNF40	22.1695	1.42395	345.156	0.0269461
FAM87B	7.76329	1.46949	41.0134	0.0158129
WDR88	15.9601	1.15343	220.841	0.0387867
TBC1D1	69.4109	3.43687	1401.82	0.00569127
LOC648496	0.0480711	0.00343988	0.671776	0.0240941
RBMS2	2.07203	1.15796	3.70762	0.0141284
SYDE1	2.89963	1.36342	6.16677	0.0056899
MFGE8	1.49344	1.0246	2.1768	0.0369444
LARP7	0.378532	0.164755	0.86969	0.0220834
EXOSC8	2.43241	1.10417	5.35843	0.0273928
PMF1	0.280521	0.0847308	0.92873	0.0374329
COQ2	0.379432	0.207325	0.69441	0.00167441
TRIM7	0.623262	0.394429	0.984853	0.0428318
ATP5EP2	4.69934	1.5903	13.8866	0.00512347
ANKRD30A	38.4303	3.08056	479.421	0.00460067
LINGO1	4.25086	1.18159	15.2928	0.0267322
ATE1	0.0172147	0.0010975	0.270017	0.00382585
COQ9	0.351977	0.169646	0.730274	0.0050459
FLJ32065	109.6	3.03189	3961.95	0.0102902
GBP6	0.83085	0.698586	0.988155	0.0362019
EPHA8	7.842	1.31584	46.7359	0.0237382
TMEM88	2.19544	1.01028	4.77093	0.0470577
LOC650494	34.3972	1.41618	835.468	0.0297237
NCF4	6.98307	1.36515	35.7201	0.0196099
C1ORF163	2.95019	1.1367	7.65695	0.026198
DBNDD1	0.533661	0.294979	0.965472	0.0378819
NFIA	0.559024	0.353728	0.883469	0.0127538
RGS4	1.5451	1.02344	2.33264	0.0384306
SIRPA	1.44456	1.03293	2.02023	0.0316129
SLC9A9	0.577481	0.361237	0.923174	0.0217949
TFAP2B	0.0304355	0.00111562	0.830319	0.0384341
TBC1D16	1.94912	1.0959	3.4666	0.0231053
RAPGEFL1	0.709999	0.526034	0.958299	0.0251987
IRX6	0.633867	0.407943	0.984908	0.0426018
RIPK2	1.8435	1.11593	3.04543	0.0169287
FAM5C	0.0876379	0.0140083	0.548274	0.0092581
PPP1R1B	28.8514	2.48211	335.361	0.00722409
WFS1	1.7338	1.03577	2.90226	0.0362906
INTS8	3.09898	1.36606	7.0302	0.00680348
PLS1	0.324249	0.177543	0.592179	0.000247378
LOC388255	35.8811	2.29092	561.98	0.0107568
LOC440132	19.729	3.29835	118.009	0.00108434
TNFSF15	81.2057	3.22412	2045.32	0.00755964
KIAA1276	26.3208	1.41375	490.034	0.0283765
LOC642675	15.2155	1.28699	179.886	0.0307597
SAMD14	19.7746	2.25793	173.183	0.00702628
POF1B	0.653527	0.439493	0.971795	0.0356149
ENG	1.67769	1.02958	2.73378	0.0378039
LOC652881	17.1298	1.45735	201.345	0.0238511
GIT2	3.07346	1.06711	8.85211	0.0374975
ACAD11	1.92289	1.06526	3.47096	0.030024
PIR	0.616461	0.449951	0.844591	0.0026007
EXT2	1.89529	1.05127	3.41695	0.0334846
WDR24	0.130371	0.0305358	0.55661	0.00593952
TNFSF8	8.86595	1.52626	51.5017	0.0150578
CSTB	0.697776	0.52099	0.93455	0.0157762
MID1	0.540191	0.343773	0.848832	0.00756846
KCNS1	0.630505	0.43495	0.913982	0.0149017
MGAT1	2.0491	1.10717	3.7924	0.0223662
C1ORF168	0.12882	0.0169334	0.979994	0.0477616
GTDC1	4.16524	1.47233	11.7835	0.00716533
LOC158572	9.03123	1.01416	80.4239	0.0485445
C19ORF59	1.90722	1.27252	2.8585	0.00176436
CANX	2.39226	1.03087	5.55154	0.0422811
GPR113	44.2032	1.72466	1132.93	0.0220628
ZNF10	0.374974	0.15191	0.925584	0.0333616
ISL1	0.581025	0.400976	0.841919	0.00411419
CLEC17A	416.886	15.7582	11028.8	0.000306296
CCBL2	0.216841	0.0648296	0.725286	0.0130887
CKMT1B	0.69883	0.513164	0.951671	0.0229446
NFKBID	9.24845	1.21648	70.3128	0.0316104
TNPO1	5.9725	1.58984	22.4367	0.00813202
BCAR3	1.58967	1.09138	2.31546	0.0157059
ALDH3B2	0.823874	0.67927	0.999262	0.0491303
PTDSS2	2.53623	1.21623	5.28883	0.0130637
AK3L1	1.55651	1.06261	2.27997	0.0231011
DAB2	1.54037	1.06885	2.21989	0.0204985
LOC652342	22.945	1.36861	384.678	0.0293977
GLTP	0.599915	0.433691	0.82985	0.00202444
C22ORF13	0.430164	0.189904	0.974391	0.0431607
ATP5A1	0.425999	0.225313	0.805435	0.00864531
ARHGAP23	0.65614	0.459872	0.936172	0.020143
UGT1A7	0.635054	0.406325	0.99254	0.0462801
PAOX	0.172139	0.0488219	0.60694	0.00620773
LHB	2.65987	1.02491	6.90298	0.0443757
CARS2	2.27731	1.05031	4.93771	0.0371342
TIMM10	1.89237	1.18797	3.01443	0.00725163
DSC3	0.753018	0.58888	0.962906	0.0237412
OLFML2B	1.49949	1.07134	2.09875	0.018193
NPAS2	3.02376	1.19886	7.62653	0.0190673
OR1B1	44.3534	1.36667	1439.42	0.0326869
HDGF	0.512209	0.291427	0.900254	0.0200635
FAM10A7	22.534	2.09282	242.629	0.0101983
SYCP2	0.58617	0.373649	0.919568	0.0200752
FLJ16686	0.169482	0.0305308	0.940822	0.0423851
CHGB	1.50787	1.08309	2.09924	0.0149837
DMBX1	18.5907	1.1641	296.894	0.0386918
LOC283824	252.136	11.908	5338.66	0.000384634
RAP1A	5.14202	1.39584	18.9423	0.0138458
LOC652607	42.4668	2.77919	648.904	0.00704447
CALHM2	3.82297	1.04181	14.0286	0.0432059
OR51M1	102.111	1.93916	5376.84	0.0221709
LRRC25	20.2168	1.91882	213.006	0.0123355
HSPA2	0.748758	0.586241	0.956327	0.0204679
FOXA1	0.776469	0.630061	0.956898	0.0176319
LOC642265	101.728	2.74164	3774.61	0.0121772
BCORL1	3.98594	1.11203	14.2871	0.0337538
LOC646858	0.0226596	0.000925025	0.555076	0.0203045
CAMK4	14.031	1.14392	172.1	0.0389141
LOC650950	26.8943	1.21265	596.464	0.0373515
PPBP	1.77516	1.18442	2.66053	0.00543917
ABCB4	6.21225	1.15462	33.4242	0.0333857
ADAMTS6	4.37349	1.77392	10.7826	0.00135087
GRIA3	88.0025	3.63922	2128.05	0.00587396
SCPEP1	0.606582	0.428076	0.859525	0.00493572
LOC493869	1.63943	1.15738	2.32225	0.00539054
AFTPH	0.266491	0.0983153	0.722342	0.0093422
LOC642639	6.47384	1.25707	33.3401	0.0255129
APH1B	2.60564	1.13855	5.96318	0.0233817
ADK	0.0935494	0.0151973	0.575859	0.010614
CXORF26	2.14231	1.00573	4.56336	0.0482951
SNRPD1	0.26198	0.101645	0.675229	0.00555571
ARPC5	2.86865	1.22618	6.71122	0.0150917
TF	0.782587	0.6167	0.993097	0.0437004
PRPSAP1	0.496895	0.281064	0.878463	0.0161417
WDR21C	0.0979903	0.010351	0.927647	0.042821
KCNK3	7.27369	1.37661	38.4324	0.0194759
LAIR1	17.7998	1.02945	307.768	0.0477119
LOC645330	17.0551	1.31196	221.71	0.0302007
DEGS2	0.209652	0.0556003	0.790532	0.0210514
FAM176B	2.92468	1.14552	7.46712	0.0248289
CYP2C8	0.114252	0.0176485	0.739638	0.0228192
ELF3	0.697357	0.528859	0.919541	0.0106375
BCL2A1	2.19186	1.20796	3.97715	0.00983837
GLIPR1	1.66866	1.08657	2.56257	0.0193201
MCCC2	0.0955755	0.0178333	0.512227	0.00612584
LCE1E	20.4678	1.1238	372.782	0.0414714
SIRPD	80.9472	3.9672	1651.65	0.00429578
LOC133993	38.6395	1.60774	928.64	0.0242798
LOC649469	31.3602	1.00952	974.188	0.0493717
LOC647326	19.011	2.55085	141.685	0.00405668
LOC653253	49.1569	1.40516	1719.66	0.0317529
FAM58A	2.11021	1.05025	4.23995	0.0359338
SOX2	0.657377	0.448343	0.963869	0.0316794
MAL2	0.747345	0.573876	0.973251	0.0306823
LOC649199	14.9598	1.30683	171.252	0.0296213
LOC651979	35.4009	1.4162	884.919	0.0298666
KRT24	0.796766	0.686249	0.925081	0.00286258
RIC8A	1.84219	1.00068	3.39135	0.0497453
PNMA1	2.19835	1.02985	4.69268	0.0417527
CDH1	0.531293	0.372493	0.757793	0.000481613
TMEM134	0.503766	0.295878	0.857718	0.0115622
HAUS4	0.484209	0.241453	0.971031	0.0410755
GARS	1.83276	1.00183	3.35287	0.0493105
SYNC1	1.89402	1.04527	3.43194	0.0352079
LOC653513	2.19599	1.06734	4.51814	0.0325978
PEA15	3.46348	1.88874	6.35115	5.93e-05
SUSD5	12.006	1.30558	110.406	0.0281268
GSTA4	0.747609	0.582954	0.958771	0.0219244
ATP5B	0.270001	0.0942508	0.773476	0.0147563
MTHFD1L	1.80037	1.12005	2.89391	0.0151758
ZFP161	0.298289	0.113068	0.786933	0.0145222
SCTR	25.3569	1.4093	456.235	0.0283328
EPX	19.6296	1.78924	215.354	0.0148495
CNOT2	0.49849	0.255132	0.973974	0.0416371
KIAA1671	0.352453	0.22175	0.560196	1.03e-05
ZNF395	0.642359	0.415229	0.993729	0.046787
UBE2NL	30.4748	2.13766	434.454	0.0117244
ST6GALNAC1	0.48543	0.284523	0.828199	0.00801241
CHPF2	4.76205	2.03844	11.1248	0.000312088
GPR124	1.93807	1.06334	3.53239	0.0307359
ESM1	2.42083	1.46693	3.99503	0.000541876
SOX11	2.35359	1.18176	4.68742	0.0148892
LOC645232	13.5015	1.5854	114.981	0.0172355
SLC25A5	0.457049	0.209489	0.99716	0.0491706
LOC647108	3.90002	1.00787	15.0914	0.0486875
ANGPT2	2.53978	1.66199	3.88116	1.65e-05
C2ORF28	0.430742	0.215562	0.860723	0.0170977
SSTR3	51.5662	2.05828	1291.89	0.0164301
PLOD3	1.48875	1.04434	2.12227	0.02782
UTP23	2.72714	1.03165	7.20917	0.043096
ZNF232	0.243446	0.0703059	0.842972	0.025779
ENTPD3	0.455557	0.208087	0.997336	0.0492253
HECW2	3.13325	1.37926	7.11779	0.00637133
LOC650815	34.5773	2.39756	498.67	0.00926346
LOC651006	31.035	1.32582	726.469	0.0327385
LOC652684	37.5641	1.88453	748.76	0.0175483
STX19	0.659794	0.474861	0.916748	0.0132144
EIF4G3	2.4596	1.18042	5.12498	0.0162703
SLC2A3	1.32236	1.04285	1.67679	0.0210935
PDGFB	2.52124	1.35139	4.70376	0.00365605
EPHA3	2.34446	1.00963	5.44406	0.0474505
MGC42367	0.615303	0.448397	0.844336	0.00262976
Septin 4	2.21249	1.24564	3.9298	0.00674141
LOC642426	24.6995	1.24927	488.335	0.0351924
ANKRD38	1.45467	1.13089	1.87115	0.00352799
E2F2	0.646954	0.440869	0.949374	0.0260505
SPDYC	0.0772472	0.00637121	0.936576	0.0442798
LOC441151	9.94709	1.4362	68.8935	0.0199876
UTP6	2.30357	1.04267	5.08928	0.0390854
SLC2A6	1.87848	1.15653	3.0511	0.0108472
TAGLN	1.42692	1.13229	1.79821	0.00258827
TBC1D21	19.054	1.22415	296.577	0.0353462
FAM47B	15.353	1.45736	161.741	0.0229988
ZNF467	1.96414	1.16338	3.31609	0.0115279
ZPLD1	15.2594	1.0006	232.709	0.0499493
ENC1	1.65468	1.11453	2.45659	0.0124972
C11ORF67	2.04397	1.00969	4.13775	0.0469497
CDH2	1.43865	1.04891	1.97318	0.024057
CSAD	17.8562	1.48575	214.602	0.0230835
PTPRG	2.2693	1.07906	4.77239	0.0307271
MARK1	0.465384	0.234399	0.923993	0.0288249
THY1	1.40943	1.08353	1.83335	0.01053
LOC652115	42.4089	1.657	1085.41	0.0234982
KIAA0738	21.9864	1.04638	461.974	0.046685
MEIS3	9.96502	1.02664	96.7246	0.0474078
LOC641798	8.10728	1.19454	55.0238	0.0322017
OSM	1.37647	1.04259	1.81727	0.0241825
THAP11	0.363032	0.169094	0.779403	0.00934146
LOC390530	3.35293	1.62286	6.92735	0.00108402
OR9Q2	41.5874	2.06029	839.451	0.015039
MGC16075	13.0135	1.83664	92.2074	0.0102141
ZMYM5	5.53638	1.36239	22.4983	0.0167457
LOC653115	2.20725	1.02338	4.76068	0.0434992
FAH	2.02538	1.17582	3.48877	0.0109679
LOC653421	7.74836	1.01867	58.937	0.0479481
C9ORF152	0.400339	0.23068	0.69478	0.00113531
PRRG1	2.16114	1.1959	3.90543	0.0106945
PAPSS1	0.60385	0.367914	0.991088	0.0460018
FAM83D	0.686284	0.481827	0.9775	0.0369728
MGST1	0.439429	0.215305	0.896857	0.0238816
FCRLB	2.05357	1.07106	3.93735	0.0302592
ZFP3	0.515487	0.277812	0.956497	0.0356424
GRHL3	0.698517	0.537787	0.907286	0.00716191
KIAA1033	2.73055	1.05559	7.06328	0.0383101
PRR12	0.0521037	0.00344563	0.787894	0.0330078
C9ORF16	0.304872	0.126721	0.73348	0.00800285
C5ORF51	0.472971	0.239588	0.933692	0.0309526
SOX21	0.768935	0.616367	0.959267	0.0198857
PANK1	0.234005	0.0778325	0.703538	0.00970815
HELLS	0.322902	0.13044	0.79934	0.0145155
LRRC37A	0.108278	0.0131041	0.894688	0.0390894
FOXN3	0.00656864	0.000333695	0.129301	0.000948235
IFT172	0.310682	0.105043	0.918895	0.0346143
TGFBR3	0.584646	0.407252	0.839312	0.00361999
LOC647191	43.2835	1.81122	1034.36	0.0199765
MMP3	1.25426	1.08298	1.45263	0.00249443
ZNF12	2.41501	1.0601	5.50164	0.0358257
TMEM2	1.77952	1.17995	2.68374	0.00597226
HERPUD2	4.10396	1.1308	14.8943	0.0318031
LOC284577	150.38	8.08432	2797.29	0.000776016
TMEM14A	0.595227	0.40329	0.878512	0.00899897
SLC26A6	2.60335	1.43844	4.71165	0.00157168
COL1A2	1.21678	1.01301	1.46154	0.0358928
PMM2	2.14632	1.03001	4.47246	0.0414596
GPR84	2.31257	1.08197	4.9428	0.0305217
DENND5A	1.72387	1.04716	2.83791	0.0322635
ZNF8	15.7649	1.03406	240.344	0.0472489
SLC17A9	2.77728	1.06349	7.25281	0.037011
TNFAIP6	1.55426	1.21027	1.99603	0.000549948
PDE4A	4.12875	1.12913	15.097	0.0320681
METAP1	0.423142	0.239346	0.748074	0.00309274
OBFC2A	1.62625	1.04595	2.52852	0.0308144
ZNF471	0.140986	0.0241343	0.823604	0.0295954
CCNA2	0.643958	0.429035	0.966545	0.0336542
LPL	2.92319	1.47014	5.81239	0.00222185
PLAGL2	0.350879	0.172576	0.713401	0.00381892
PROM1	0.769167	0.616857	0.959083	0.019752
ICAM2	1.57506	1.01967	2.43296	0.0405847
PRKX	0.470562	0.226054	0.979535	0.0438794
SLC43A2	2.03682	1.02668	4.04081	0.0418197
MEGF11	28.3531	1.33977	600.027	0.0317306
ADD3	0.652947	0.472187	0.902905	0.00994914
C3AR1	2.95468	1.2181	7.16703	0.0165591
PLLP	0.199873	0.0850609	0.469656	0.000220917
LOC653917	36.7607	2.10696	641.372	0.01348
C19ORF10	2.18858	1.19263	4.01622	0.0114486
Septin 12	64.1141	2.35767	1743.51	0.013553
APITD1	0.26631	0.0838016	0.846299	0.024906
RAB13	1.75263	1.05598	2.90885	0.0299547
FRAT2	0.615105	0.379227	0.997696	0.0489173
LDOC1	0.655068	0.433938	0.988883	0.0440973
UGCGL2	3.05948	1.3521	6.9229	0.00727489
FAM108C1	0.504594	0.331955	0.767016	0.00136738
LOC732075	0.447156	0.223552	0.894416	0.02288
EXOC5	4.33874	1.2263	15.3507	0.0228221
SRD5A2	0.0702784	0.00559813	0.882268	0.0396863
GGT6	0.324442	0.184637	0.570109	9.09e-05
C1ORF188	0.321416	0.152992	0.675257	0.00272946
EEF2K	0.485497	0.2611	0.902747	0.022415
PKD2L1	5.56108	1.13426	27.2649	0.034406
FMOD	1.8513	1.16484	2.9423	0.00917537
PAX6	0.227544	0.052499	0.986237	0.0478739
HGF	0.00790584	0.000200881	0.31114	0.00979381
ZNF181	0.251737	0.0794215	0.797914	0.019103
C7ORF63	2.49137	1.08292	5.73167	0.0317652
TPRG1	0.502763	0.269737	0.937101	0.0304297
BCAM	0.235246	0.0713216	0.775929	0.0174728
CCDC146	0.424322	0.23888	0.753722	0.00345035
C16ORF63	0.521825	0.275605	0.988014	0.0458265
POSTN	1.38867	1.14064	1.69064	0.00107266
HCN4	9.26652	1.274	67.4009	0.0278667
NFE2L2	0.547271	0.369029	0.811604	0.00271599
TMPRSS2	0.732461	0.5398	0.993883	0.0455689
CDH10	0.0295355	0.00190184	0.458684	0.0118388
ITGA7	11.3245	1.10356	116.209	0.0410612
FA2H	0.31248	0.114237	0.854749	0.0234722
CHSY1	2.02237	1.27874	3.19843	0.00260159
CLEC2L	12.1627	1.11939	132.154	0.0401092
RAB25	0.667123	0.506393	0.878867	0.0040017
LOC731878	2.06138	1.02221	4.15696	0.0432448
LAMB4	0.0297788	0.00212456	0.417394	0.00909217
RNF165	0.719084	0.531256	0.97332	0.0327575
STX7	2.5835	1.2358	5.40091	0.0116465
ITGA5	1.45381	1.13419	1.86349	0.003136
LOC729966	0.148842	0.0281874	0.785953	0.0248543
MED12	0.324716	0.120246	0.876871	0.0264729
C1ORF51	0.404248	0.197963	0.825491	0.0129028
TM7SF4	10.8772	1.83469	64.4866	0.00858187
ALDH2	0.637492	0.458203	0.886936	0.00753838
FAM49A	3.01897	1.03418	8.813	0.0432338
PGD	0.730088	0.544077	0.979693	0.0360199
ZNF469	2.9091	1.23265	6.86556	0.0147932
ADPRH	5.41781	1.59102	18.449	0.00687679
KIF11	0.515388	0.292948	0.906732	0.0214681
FUT2	0.524815	0.329599	0.835654	0.00659864
HES5	0.56781	0.382629	0.842614	0.00494991
CHRNA3	65.6969	6.30469	684.583	0.000465707
CAMK2N1	1.41368	1.08755	1.83761	0.00967737
UBTD1	2.15959	1.03457	4.50799	0.040318
LRRC3	3.59913	1.07349	12.067	0.0380006
FGR	1.67925	1.03328	2.72905	0.0364294
PTH1R	3.15975	1.27053	7.85819	0.0133217
GPT	0.181899	0.0536382	0.616856	0.00623132
LAMA4	1.95278	1.29799	2.93789	0.00132021
RAD51	0.048085	0.00270593	0.854484	0.0387269
RPA1	0.458312	0.241476	0.869856	0.0170127
CNKSR2	49.3069	1.53017	1588.82	0.0278037
SFXN2	0.180447	0.0330813	0.984273	0.0478973
C18ORF56	0.597898	0.389771	0.917159	0.0184686
NKX2-3	0.161969	0.0457125	0.573894	0.00479748
ZUFSP	3.15314	1.05901	9.38834	0.0391172
GIPC1	0.568744	0.360787	0.896569	0.0150937
CXCL17	0.664154	0.473464	0.931645	0.017788
LOC646383	60.5799	1.72217	2130.98	0.0238706
EDNRA	1.57959	1.01413	2.46032	0.043173
NCF2	1.8062	1.21451	2.68615	0.0035039
HBG1	2.05596	1.20868	3.49717	0.0078316
SPARC	1.37636	1.07039	1.76978	0.0127654
APM-1	0.553115	0.378839	0.807563	0.00216319
LOC116349	0.0794485	0.00778844	0.810439	0.0325706
CXADR	0.676594	0.487508	0.939019	0.0194801
ZNF449	84.4483	3.60008	1980.94	0.00585706
LOC158318	33.9959	1.12347	1028.71	0.0426743
MYO1B	1.49005	1.03168	2.15208	0.0334848
PRSS23	1.36174	1.01221	1.83197	0.0413341
C2ORF65	0.0191122	0.00125543	0.290958	0.0043907
ANKRD35	0.642425	0.474425	0.869915	0.00422328
ZFYVE26	2.32652	1.13073	4.7869	0.0218065
HOXD3	6.08652	1.17651	31.4877	0.0312544
KIAA1468	0.60696	0.37873	0.972726	0.0379977
RASSF9	0.630765	0.409002	0.972771	0.0370818
NUDT21	0.525513	0.312225	0.884503	0.0154365
CMTM2	2.64489	1.06555	6.56514	0.0360083
LOC652846	0.686179	0.479472	0.981999	0.0394668
DNAJC9	0.489407	0.260224	0.920435	0.0266077
STARD8	3.39476	1.1698	9.85154	0.0245449
ANKRD22	0.673017	0.483011	0.937768	0.0193049
ETNK2	0.378613	0.188019	0.76241	0.00653723
FLJ35409	15.3705	1.17846	200.475	0.0370436
PTCH1	0.0875127	0.0084832	0.902782	0.0407702
RBMY1A1	2.88649	1.06598	7.8161	0.0370073
BBS1	0.40985	0.176206	0.953299	0.0383578
OR4M1	0.00482991	0.000108553	0.2149	0.00588731
DACT1	3.03359	1.61994	5.68085	0.000526229
PLIN2	1.78176	1.14959	2.76156	0.00977978
C16ORF33	0.446964	0.231948	0.861299	0.0161239
LOC648984	3.63101	1.50608	8.75403	0.00407842
CENPA	0.503532	0.281016	0.902244	0.0211297
FAM78A	13.242	1.57842	111.093	0.0172868
GOT2	0.534426	0.332509	0.858956	0.00965535
YEATS4	0.533216	0.308636	0.921213	0.0241876
LOC651647	89.5405	2.87129	2792.3	0.0104391
CDS1	0.502071	0.326401	0.772289	0.00171232
C8ORF86	54.261	1.83562	1603.95	0.0208052
PTX3	9.12006	1.27745	65.1107	0.0275157
ATG4D	0.130263	0.0241914	0.701423	0.0176522
SH3BP2	24.4026	1.53733	387.351	0.0235224
C1ORF50	2.29386	1.08127	4.86632	0.0304963
ABTB1	1.88205	1.06522	3.32522	0.0294405
C10ORF99	0.852559	0.728902	0.997195	0.0460321
ITGA1	2.24798	1.19892	4.21498	0.0115496
LOC649897	248.123	15.4381	3987.86	9.96e-05
TOM1L1	0.28756	0.130826	0.632068	0.00192448
EPHB6	0.433519	0.219112	0.857732	0.0163608
SYVN1	1.80168	1.06184	3.057	0.0290794
STOX2	0.648295	0.433292	0.969982	0.0350124
LOC389895	29.4593	1.24404	697.607	0.0361529
AEBP2	0.436877	0.212122	0.899772	0.0246738
LOC113230	0.115013	0.0230721	0.573337	0.00832316
ADA	2.10945	1.38147	3.22105	0.000547726
AP2A2	4.14193	1.17833	14.5592	0.0267034
RRBP1	2.04357	1.24256	3.36094	0.00487018
TM7SF3	0.642154	0.413149	0.998096	0.0490181
FAM135A	0.566546	0.346773	0.925606	0.0232913
MYH14	0.363021	0.204884	0.643215	0.000516676
C12ORF23	2.52128	1.28385	4.95141	0.00724035
PLEKHH3	0.540069	0.303569	0.960817	0.0360863
RAVER2	0.425272	0.220625	0.819747	0.0106626
C6ORF130	0.501395	0.255861	0.982552	0.0442996
ABAT	0.0827567	0.012408	0.551958	0.0100592
GPC6	1.89059	1.04047	3.43531	0.0366026
LOC168474	0.0705984	0.00509044	0.979116	0.0481894
ADAMTS9	2.27372	1.40439	3.68115	0.000833418
LSM8	0.36343	0.134681	0.980698	0.0456681
PGAP3	0.518808	0.297256	0.90549	0.0209245
RILPL1	1.79544	1.00084	3.22088	0.0496717
ALKBH4	0.195206	0.046599	0.81773	0.0253987
DHX37	54.6288	4.01577	743.146	0.00266617
LOC653583	0.410082	0.20393	0.82463	0.0123861
C4ORF37	33.1697	1.69215	650.198	0.021087
LOC647947	0.449894	0.202799	0.998057	0.0494433
JUN	1.36613	1.00499	1.85703	0.0464002
PPL	0.772438	0.619297	0.963449	0.0220071
LOC641697	108.766	3.10222	3813.39	0.0097728
PDIK1L	0.486826	0.246204	0.962615	0.038499
PARP8	4.84506	2.03972	11.5088	0.000350479
COL18A1	1.47625	1.02701	2.12199	0.0353826
UBE2E1	2.196	1.06939	4.50951	0.0321375
CSDC2	9.18279	1.28887	65.4247	0.0268797
MARCKS	2.53888	1.43133	4.50343	0.00144089
RC3H1	19.7848	1.33338	293.568	0.0300798
DHRS7	1.69576	1.08215	2.65731	0.0211981
PADI4	1.8541	1.08272	3.17505	0.0244774
MICAL1	1.86858	1.20833	2.8896	0.00494201
C11ORF24	2.25706	1.05736	4.81798	0.0353677
LOC642295	86.9102	3.92686	1923.52	0.00471915
RGS16	2.01413	1.18334	3.4282	0.00987034
IQSEC1	2.16062	1.01605	4.59454	0.0453572
CEP68	0.2758	0.0901386	0.843877	0.0239792
OR4A16	147.868	5.05148	4328.45	0.00373038
MYO5C	0.564934	0.388058	0.822431	0.00288065
ATP5SL	0.235896	0.0945403	0.588604	0.00196127
THAP9	0.0170019	0.00200421	0.144228	0.000187705
FLJ37228	22.6962	1.06278	484.69	0.0456144
HPR	285.469	6.17453	13198.2	0.00384443
C9ORF125	0.348729	0.166421	0.73075	0.00525391
CYP4F12	0.459018	0.315232	0.668389	4.88e-05
COX8A	0.499922	0.250689	0.996942	0.0489921
ZSCAN16	0.502024	0.269928	0.933686	0.029503
TMEM26	3.9753	1.31922	11.979	0.0141978
PGF	1.59622	1.04614	2.43554	0.0300688
FLJ23834	0.266598	0.0721368	0.985271	0.0474554
RCN3	1.68499	1.14316	2.48363	0.00839174
LOC642795	33.648	1.17216	965.904	0.0401015
OR10J1	17.3538	1.02577	293.591	0.0479747
RUSC2	2.73282	1.01981	7.32319	0.0456111
ATR	17.613	1.28093	242.182	0.0319445
DYSF	1.66204	1.08583	2.54404	0.0193313
RHOQ	1.63038	1.09214	2.43389	0.0167976
ELMOD1	7.74005	1.13424	52.8182	0.0367511
C4BPA	0.0434919	0.00218046	0.867496	0.0400681
HEATR5B	0.31929	0.122392	0.832948	0.0196177
SPRR3	0.892711	0.803947	0.991274	0.0336722
MTDH	2.41186	1.25191	4.64658	0.00850125
LAMC1	1.65296	1.07616	2.5389	0.0217225
C15ORF58	0.0643151	0.00919345	0.449933	0.00569856
MPZ	14.0716	1.16328	170.215	0.0376287
LOC653496	5.53873	1.63866	18.7212	0.00587345
ALPK2	1.42301	1.07617	1.88163	0.013323
SGPP2	0.709525	0.546364	0.921411	0.0100567
TFF3	0.844385	0.721341	0.988418	0.0352963
DLG3	0.0976656	0.0171768	0.555316	0.00870802
OR52B6	36.4858	1.599	832.531	0.0241892
COPA	2.84908	1.26456	6.41905	0.0115259
ENTHD1	19.1557	1.25063	293.403	0.0339561
CNP	0.0635107	0.00450456	0.895451	0.0411756
FOXS1	2.86621	1.15565	7.10872	0.02308
LOC642570	29.115	2.02564	418.476	0.0131739
CADM4	0.55022	0.338666	0.893925	0.0158293
KIF5A	47.4252	1.17072	1921.16	0.0410105
PHCA	1.6536	1.06424	2.56935	0.0252954
LOC391352	5.32709	1.40925	20.1369	0.0136781
ARAP3	1.57794	1.03568	2.40411	0.0337398
ANTXR2	1.59768	1.11747	2.28425	0.0102026
ITGA9	3.36428	1.42652	7.93426	0.00558037
LMO3	0.234418	0.0673224	0.816246	0.022671
DISP2	3.1076	1.13863	8.48141	0.02687
OXCT1	0.359729	0.170755	0.757839	0.00715946
SCIN	0.56569	0.344081	0.930028	0.0247081
RAB7L1	3.7347	1.30136	10.718	0.0142987
KIAA1199	0.744815	0.560834	0.989151	0.0418183
ADI1	0.282022	0.136682	0.581905	0.000614625
AGR2	0.594331	0.397351	0.888961	0.0113109
SCNN1G	0.462331	0.227477	0.939657	0.0330096
PHLPP1	0.178132	0.057362	0.55317	0.00284429
BCMO1	0.301735	0.113519	0.80202	0.0162928
LNPEP	2.96581	1.04218	8.44007	0.0416113
PIAS3	0.343919	0.148607	0.795927	0.0126632
PDGFRB	1.48454	1.09978	2.00391	0.00984237
HBD	23.3879	7.19599	76.0135	1.59e-07
TIE1	9.01742	1.92045	42.341	0.00532087
FCHSD2	2.15838	1.00224	4.6482	0.0493365
GYPE	22.2317	1.21152	407.955	0.0366884
HS.565411	59.2845	1.94209	1809.72	0.0192569
HS.516420	13.3073	2.10399	84.1656	0.00595269
HS.581671	21.5122	1.10202	419.934	0.0429662
HS.575253	155.855	6.74225	3602.77	0.00162731
HS.551815	0.180777	0.0469017	0.696786	0.0129631
HS.543887	3.79777	1.79244	8.04658	0.000495216
HS.572238	31.1785	1.06442	913.262	0.0459126
HS.135282	0.330635	0.127456	0.857704	0.0228719
HS.131074	37.5923	2.5456	555.146	0.00828723
HS.544321	94.0693	3.76286	2351.68	0.00565977
HS.571887	1.81121	1.01153	3.24309	0.0456604
HS.575542	30.5952	1.4827	631.326	0.0267607
HS.157344	2.52239	1.25947	5.05171	0.00902824
LOC728653	2.45099	1.17762	5.10125	0.0165235
HS.453381	110.006	7.54956	1602.9	0.000584149
HS.528160	17.1805	1.18915	248.219	0.0368787
HS.127352	42.0276	4.3144	409.402	0.00128766
HS.374221	130.676	9.79567	1743.25	0.000227551
HS.442504	11.5211	2.04973	64.7581	0.00552468
HS.120938	0.0152801	0.000667932	0.34956	0.00884181
HS.137206	4.25155	1.44774	12.4855	0.00846024
HS.553301	1.92583	1.102	3.36552	0.0213922
HS.565209	55.4719	1.89892	1620.47	0.0196785
HS.582537	142.278	3.03908	6660.9	0.0115241
HS.577495	44.6956	1.64124	1217.18	0.0242066
HS.47453	0.0399687	0.00185837	0.859625	0.0397264
HS.131670	60.2012	2.87626	1260.03	0.00827006
HS.552826	0.351255	0.128477	0.960327	0.0414648
HS.513971	4.21794	1.10328	16.1256	0.0354123
HS.25318	0.649018	0.4794	0.878651	0.00515817
HS.564221	144.453	6.41268	3253.97	0.00175214
HS.538259	0.544203	0.323201	0.916325	0.0220987
FLJ33544	30.7135	1.10541	853.361	0.0434821
HS.539888	116.665	4.56215	2983.39	0.00400599
HS.554203	0.615133	0.442213	0.85567	0.00390673
HS.122133	115.383	3.12923	4254.46	0.00988686
HS.575095	3.38535	1.09032	10.5113	0.0348975
HS.97408	21.8778	1.12033	427.23	0.0418608
HS.580229	0.350901	0.128808	0.955934	0.0405503
HS.545246	69.8519	5.2519	929.053	0.00129917
HS.579530	0.39411	0.21972	0.706911	0.00178726
HS.79881	0.736107	0.542048	0.999641	0.0497319
HS.10862	1.63043	1.14504	2.3216	0.00670638
LOC728119	69.3312	3.06458	1568.51	0.00772833
HS.539177	44.8373	2.25581	891.202	0.0126559
HS.445121	0.0617902	0.00471531	0.809711	0.0339424
HS.250648	0.572853	0.341617	0.96061	0.0346582
HS.579295	13.8119	1.72099	110.848	0.0134779
HS.164409	98.4681	3.46631	2797.2	0.00718853
HS.349049	14.792	1.12854	193.88	0.0401625
HS.554567	56.1181	2.09807	1501.02	0.0163105
HS.573047	0.144583	0.0256949	0.813555	0.0282308
HS.437395	11.7323	1.91434	71.9025	0.00776801
HS.21856	49.5708	1.50334	1634.53	0.0286299
HS.44650	80.3979	3.47783	1858.58	0.00618483
HS.557431	6.2496	1.77879	21.9573	0.00425943
HS.565863	9.18462	1.0455	80.6863	0.0454902
HS.98462	10.4201	2.2579	48.0881	0.00266674
HS.520349	18.6244	1.64654	210.666	0.0181337
LOC199800	3.13815	1.07874	9.12917	0.0358103
HS.542230	54.9499	1.69311	1783.4	0.0240366
HS.538746	0.0485403	0.00463857	0.50795	0.0115569
HS.180848	0.00815555	0.000228703	0.290826	0.00835831
HS.561033	50.1981	1.5662	1608.89	0.0268581
HS.562889	0.0378304	0.00257145	0.556548	0.0169797
HS.98960	9.19001	1.07666	78.4431	0.0426136
HS.544228	0.0455234	0.0022863	0.906431	0.0429359
HS.444692	6.42792	2.18186	18.9371	0.00073763
HS.190748	1.97887	1.07437	3.64484	0.0285131
HS.196122	15.2301	1.51093	153.518	0.0208845
HS.568434	49.6363	1.98909	1238.63	0.017363
HS.278265	0.385706	0.168956	0.880521	0.0236917
HS.575241	129.266	4.72535	3536.17	0.00397914
HS.541273	23.4083	1.06811	513.007	0.0453069
HS.543412	12.2432	1.65005	90.844	0.0142967
HS.153034	95.7234	3.01958	3034.52	0.00969185
MGC3032	2.26232	1.03893	4.92634	0.0397682
HS.579714	13.0267	1.06753	158.96	0.0443086
HS.7572	0.421646	0.18347	0.969017	0.041942
HS.336370	6.19862	1.89805	20.2433	0.00251754
HS.579531	27.8431	1.8352	422.428	0.0165048
HS.542428	4.21081	1.21091	14.6427	0.0237641
HS.222909	2.8434	1.25682	6.43287	0.0121171
HS.542732	0.0331063	0.00199348	0.549807	0.0174436
HS.319053	31.2936	2.58841	378.336	0.00677205
HS.561526	0.13433	0.0272367	0.662504	0.0136757
HS.137598	11.6636	1.23017	110.586	0.0323171
HS.445079	114.826	1.61464	8165.88	0.0292446
HS.98466	7.90704	1.35333	46.1981	0.0216806
HS.131259	39.0773	2.36841	644.75	0.0103835
HS.544465	32.4048	1.38039	760.705	0.0307598
HS.225083	0.0438976	0.00410488	0.469441	0.00972586
HS.513455	33.0291	1.34088	813.586	0.0324038
HS.460114	0.0277199	0.00097607	0.787231	0.0357216
HS.454202	0.015678	0.000606769	0.405094	0.0122588
HS.553231	31.0548	1.02207	943.577	0.048553
HS.493239	10.4078	1.41175	76.7291	0.0215462
LOC731895	3.66465	1.40431	9.56317	0.00795956
NTN1	0.522453	0.308284	0.885407	0.015858
HS.544388	130.631	4.84512	3522.01	0.00374645
LOC729310	305.233	6.62186	14069.6	0.00342063
GJA3	0.571575	0.331868	0.984419	0.0437395
HS.562638	31.9119	1.45186	701.425	0.0280599
HS.345700	20.0419	1.84295	217.953	0.0138138
LOC731227	26.6313	1.23572	573.936	0.0361647
HS.569956	17.9593	1.24601	258.853	0.0338769
HS.566820	20.61	1.45853	291.234	0.0251373
HS.566395	0.0554219	0.00485139	0.633135	0.0199249
HS.560132	47.0363	1.9756	1119.87	0.017269
HS.439031	25.7097	2.47589	266.969	0.00654321
HS.539213	55.2942	4.16697	733.735	0.00235116
HS.559770	7.13674	2.44826	20.8038	0.000317916
HS.545422	5.9816	1.03482	34.5756	0.0456949
HS.540642	100.518	3.23192	3126.25	0.00856699
HS.575075	38.3333	1.50314	977.578	0.0273419
HS.552282	3.89463	1.70486	8.89704	0.00125688
HS.443534	61.7798	2.85107	1338.71	0.00860001
HS.574069	49.3996	1.21499	2008.51	0.0391152
HS.582560	47.609	2.59265	874.248	0.00928049
HS.160602	0.0950117	0.0094886	0.951375	0.045245
HS.560740	29.9842	3.26344	275.492	0.00265408
HS.568612	767.125	16.9784	34660.5	0.00063427
HS.564338	89.4871	4.324	1851.97	0.00364795
SNORD13	1.41505	1.00907	1.98436	0.044187
HS.565248	23.1117	1.50985	353.778	0.0240742
HS.578117	0.0814709	0.00763839	0.868967	0.03787
HS.566514	34.0288	1.88165	615.396	0.0169435
HS.401073	85.9446	3.82818	1929.5	0.00502233
HS.577923	0.0255687	0.00103803	0.629807	0.0249107
HS.42612	0.0759029	0.00714664	0.806148	0.0324589
HS.471011	0.0229777	0.000798498	0.661211	0.0277143
HS.547503	6.81463	1.2515	37.1068	0.0264584
HS.444939	247.578	4.19744	14602.9	0.00806046
HS.562488	24.0588	1.13059	511.968	0.0414863
HS.128753	0.0994172	0.013392	0.738036	0.024011
HS.127857	0.0229505	0.000927345	0.567994	0.0211404
LOC730274	0.284776	0.0811954	0.998793	0.0497799
HS.564531	77.6049	2.97703	2023	0.00890439
HS.570308	2.29698	1.06393	4.95908	0.0341946
HS.436134	1.66469	1.09213	2.5374	0.0177985
HS.507449	35.703	1.17794	1082.15	0.0399707
HS.238996	6.93554	1.17417	40.9664	0.0325857
HS.567477	15.266	1.3665	170.546	0.0268595
HS.560817	30.8784	1.15592	824.863	0.0407158
HS.544719	23.1979	2.25894	238.229	0.00815255
HS.545947	40.4374	1.13148	1445.18	0.0425948
HS.554452	1560.6	54.223	44916.1	1.79e-05
HS.544238	0.0756778	0.00703556	0.814026	0.0331937
HS.319406	44.9486	3.47962	580.632	0.00355521
HS.541654	0.0393724	0.00232476	0.666815	0.025047
HS.565250	9.75325	1.14025	83.4256	0.0375427
HS.336511	11.7876	2.17616	63.8505	0.00420971
HS.390407	2.34554	1.13695	4.83889	0.0210358
HS.125247	32.8864	1.17598	919.672	0.0398457
HS.150800	23.1155	1.55617	343.36	0.0225372
HS.560563	11.8889	1.04039	135.858	0.0463902
HS.377419	10.7545	1.9663	58.8206	0.00614584
HS.199657	8.0958	1.01442	64.6103	0.0484417
HS.544430	69.9358	1.74499	2802.9	0.0240947
HS.34558	2.12379	1.08455	4.15888	0.0280438
HS.545687	30.5039	1.41383	658.136	0.0291879
LOC730841	17.6409	1.64459	189.228	0.0177443
HS.4986	0.167096	0.0367408	0.759949	0.0206039
LOC729335	6.26085	1.13029	34.6797	0.0357117
HS.548146	27.675	1.0015	764.759	0.0498967
HS.444329	1.74092	1.14065	2.65707	0.0101696
HS.582516	142.929	4.38032	4663.71	0.00526032
HS.564967	0.0396807	0.00200436	0.785569	0.0341408
HS.518426	47.4035	2.26145	993.653	0.0129334
HS.561786	15.5652	1.10513	219.227	0.041948
HS.22305	0.0719158	0.00778562	0.664287	0.0203101
HS.571950	68.7886	2.15223	2198.59	0.0166842
HS.570636	10.9456	1.40723	85.136	0.0222322
HS.440343	0.195982	0.0431471	0.890183	0.0348053
HS.492187	3.60937	1.41697	9.19399	0.00713403
HS.257688	0.00653712	0.000162194	0.263474	0.00764905
HS.545887	254.275	12.3888	5218.93	0.000327563
HS.563783	75.7865	3.62283	1585.39	0.00527554
HS.540289	15.4228	2.55776	92.996	0.00284108
HS.569175	9.44813	1.76205	50.661	0.00876464
GPR172A	1.71582	1.04074	2.82881	0.034302
MYOZ2	9.09202	1.53365	53.9008	0.0150606
ILDR1	0.650414	0.452016	0.935894	0.020514
FANCE	0.642561	0.415834	0.992907	0.0463687
DEFB106B	45.294	1.77251	1157.42	0.0211028
CFHR2	22.5702	1.75901	289.602	0.0166784
DCI	0.289449	0.14771	0.567198	0.000303807
E2F1	4.2228	1.17844	15.1319	0.0269597
A1BG	15.2989	1.06992	218.762	0.0444569
PLCH2	0.540312	0.377847	0.772633	0.00074208
IGFBP7	1.54611	1.15216	2.07474	0.00368554
MALL	0.792065	0.637418	0.984231	0.0354324
HAND2	14.9166	1.14074	195.054	0.0393648
SCG5	1.38875	1.0517	1.83381	0.0205941
RRP8	3.15246	1.23753	8.03049	0.0160982
OR11H1	10.651	1.26977	89.3423	0.0292528
GPR4	2.26399	1.04972	4.8829	0.037188
LRIG3	0.366743	0.183772	0.731886	0.00443637
G6PC	48.417	1.81395	1292.32	0.0205944
PJCG6	0.351349	0.123487	0.999671	0.0499279
KIAA0415	2.7924	1.09605	7.11416	0.0313831
UCN	3.5829	1.07645	11.9255	0.0375224
HBG2	2.15936	1.25189	3.72464	0.00564647
C12ORF64	53.845	2.70824	1070.54	0.00897292
CCL1	23.7054	1.01836	551.819	0.0486907
PSMG2	0.443548	0.220854	0.890792	0.022312
FPR1	1.59817	1.00636	2.538	0.0469396
IMPA2	0.704811	0.530122	0.937065	0.0160722
ZDHHC1	0.585945	0.347276	0.988643	0.0452032
VWA3B	0.0265803	0.000879276	0.803519	0.0370021
FADS3	11.0995	1.39548	88.285	0.0229101
LOC440350	0.108373	0.0144174	0.814617	0.0308355
HBB	1.257	1.08652	1.45424	0.00209956
UTP20	8.61002	1.23765	59.8979	0.0296001
DEFB124	0.0215017	0.000986291	0.468751	0.0146136
CCL3L3	1.29917	1.05519	1.59957	0.0136583
KIF12	26.9852	2.71436	268.278	0.00492191
CD300LF	1.82271	1.02796	3.23193	0.0399452
NCF1C	2.03191	1.04817	3.93892	0.0357927
PLXNC1	6.89563	1.50989	31.4922	0.0127147
SAMD4A	3.63183	1.70866	7.71962	0.000801028
TPRXL	0.405153	0.216127	0.759502	0.00483275
FLJ43093	0.0607651	0.00683951	0.539864	0.0119678
F2RL3	9.54086	2.60185	34.9859	0.000668125
LRRC32	1.65246	1.07381	2.54294	0.0223864
TMEM47	1.5822	1.00319	2.4954	0.048421
TSSC1	0.312588	0.123624	0.790394	0.014012
GPX2	0.829171	0.714395	0.962387	0.0137276
DNAH12L	0.0463187	0.00344876	0.622084	0.0204421
TTTY14	0.0278534	0.00176599	0.439308	0.0109448
CLDN7	0.72913	0.55344	0.960594	0.0247187
FAM50B	0.496628	0.265257	0.929815	0.0287143
RAB43	5.15401	1.90359	13.9546	0.00125227
SNORD48	7.13349	1.14664	44.379	0.0351452
IL1F9	0.855855	0.733578	0.998515	0.047832
LOC492303	0.0619024	0.00412685	0.928531	0.0440482
NMU	0.703188	0.55317	0.893892	0.00402553
CGB5	1.76632	1.00239	3.11246	0.0490439
KIF21B	3.18627	1.13078	8.97815	0.028343
ENY2	1.82371	1.03518	3.21289	0.0375584
RASD2	1.5853	1.0116	2.48436	0.0444003
TRIM74	0.067744	0.0075139	0.610768	0.0164214
FTHL3	1.50667	1.03862	2.18564	0.0308035
GPR83	0.115125	0.0212987	0.622277	0.0120401
C21ORF129	0.166597	0.0359635	0.771742	0.0219508
CCDC13	29.4153	1.20271	719.426	0.0381608
KIAA0895L	0.0309199	0.00153512	0.622778	0.0232643
NAT11	0.0138581	0.000668148	0.287433	0.00567706
TUBB8	0.0443902	0.00205336	0.959644	0.0470076
PRELID1	2.03946	1.08204	3.84404	0.0275401
ARMET	1.94836	1.03414	3.67081	0.0390342
PHYHD1	0.213762	0.0716298	0.637919	0.00567787
CSRNP2	3.58813	1.22388	10.5196	0.0199075
CYR61	1.2933	1.00396	1.66602	0.0465301
KRTAP21-1	43.8025	3.38634	566.588	0.00380564
RGS2	1.55358	1.13449	2.12747	0.00602016
C20ORF106	15.3753	2.00473	117.921	0.00856139
INPP4B	1.58641	1.02899	2.44579	0.0366775
SLITRK4	2.53593	1.00581	6.39376	0.048581
CYTL1	2.1958	1.01127	4.76781	0.0467804
UBLCP1	2.26924	1.13628	4.53186	0.0202345
BGN	1.37224	1.06277	1.77183	0.0152318
RABAC1	1.71238	1.06213	2.76071	0.0272913
DERL1	2.05558	1.05521	4.00433	0.0341811
CCDC42	0.0581504	0.0049277	0.686216	0.0238839
SLFN13	0.473703	0.246477	0.910409	0.0249905
SREBF2	11.359	1.20931	106.694	0.0334819
C6ORF72	3.01897	1.18846	7.66891	0.0201815
PRAMEF4	0.0893457	0.012673	0.629896	0.015359
PRDX4	1.96121	1.13443	3.39055	0.0158855
ADH7	0.837805	0.732609	0.958107	0.00973458
CCDC129	0.0220982	0.00086207	0.566463	0.0212589
AUH	0.361884	0.140935	0.929228	0.034642
ACTN1	1.47421	1.08742	1.99858	0.0124281
FAP	1.58417	1.18801	2.11245	0.00172865
IL1RL1	2.55405	1.20976	5.39212	0.0139165
LOC389816	0.706486	0.539509	0.925141	0.011552
LOC390748	89.1019	3.49734	2270.05	0.00657067
OVOS2	0.225736	0.0515968	0.987593	0.0480933
NAIP	67.8911	3.91799	1176.42	0.00375173
DPH2	51.4477	1.66117	1593.38	0.0244672
RGNEF	0.0450386	0.00431558	0.470036	0.00957323
TBXAS1	1.79815	1.00153	3.22842	0.0494048
SEZ6L2	20.4715	1.08155	387.483	0.0441971
ZNF41	0.0315153	0.00135853	0.731095	0.031145
SHANK3	1.65554	1.00744	2.72056	0.0466776
TAS1R1	0.0276361	0.00129683	0.58894	0.0214959
ODZ3	1.30446	1.02067	1.66716	0.0337207
PCDHA12	28.7081	1.21203	679.983	0.0376128
INSC	16.3359	1.39859	190.807	0.0259159
CMYA3	13.0479	1.03201	164.966	0.0472217
IGSF5	0.0373655	0.00271863	0.51356	0.0139575
FLJ12949	0.256511	0.076842	0.856279	0.0269496
ERBB2	0.445241	0.298203	0.66478	7.61e-05
SUSD4	0.572102	0.360636	0.907567	0.0176964
SLC16A3	1.62157	1.1615	2.26387	0.00452038
FBXO25	0.0273173	0.00129436	0.576529	0.0206718
MS4A4A	1.97211	1.10595	3.51664	0.0213799
PTPN13	0.574813	0.399673	0.826702	0.00282293
DLGAP1	0.0595749	0.00437229	0.811742	0.0343045
MCHR2	12.9057	1.16446	143.034	0.0371576
WDR21A	2.2521	1.22422	4.143	0.00904245
GOPC	2.78705	1.15643	6.71691	0.0223837
HSD11B1	4.91141	1.67292	14.4191	0.00377471
GABBR1	2.44537	1.09335	5.46932	0.0294614
SSX4B	0.0483366	0.00380409	0.614188	0.0195022
PEAR1	2.63674	1.15734	6.00724	0.0210113
KEAP1	0.478607	0.236435	0.968829	0.0405623
LOC100130919	0.521333	0.283546	0.95853	0.0360582
FTHL16	1.73296	1.00766	2.98031	0.0468608
C21ORF126	8.80703	1.64073	47.274	0.0111656
LOC100127909	0.546599	0.359382	0.831345	0.00475306
DIPAS	18.2644	1.29945	256.716	0.0312236
LOC100130301	20.3918	1.92506	216.005	0.0122846
CCNYL2	9.55471	1.13392	80.5105	0.0379366
LOC100129218	117.824	4.57863	3032.01	0.00400089
FLJ37786	45.9323	2.45252	860.249	0.0104654
LOC100128098	3.67975	1.4083	9.6148	0.00784541
LOC100128374	13.2759	1.07098	164.567	0.0440774
LOC100130492	2.01664	1.00478	4.0475	0.048453
KRT18P30	0.0105078	0.00054143	0.203929	0.0026059
LOC100128781	0.187882	0.0400653	0.881049	0.0339565
C10ORF75	0.0870299	0.0140266	0.53999	0.00875104
FAM176A	1.48275	1.00773	2.18167	0.0456039
LOC645638	0.788242	0.659912	0.941527	0.00867693
LOC441131	2.4294	1.17734	5.01297	0.016319
LOC646034	6.06306	1.58366	23.2125	0.00850934
LOC392288	29.4373	1.12036	773.465	0.042549
LOC643768	0.0705384	0.00902549	0.551291	0.0114841
LOC100132493	9.40362	1.58798	55.6859	0.0135274
LOC100132535	1.42148	1.05881	1.90836	0.019271
LOC648927	0.0676417	0.00888229	0.515115	0.00931178
LOC644525	0.0145145	0.000467521	0.450615	0.0157464
LOC646936	2.87844	1.15539	7.17109	0.0232012
LOC389328	0.623489	0.421836	0.921542	0.0177961
LOC648665	11.818	1.58748	87.9795	0.0159014
LOC647597	0.317534	0.120293	0.838185	0.020537
LOC728060	5.07438	1.4772	17.4312	0.00989128
GAFA1	57.3259	1.31353	2501.85	0.0355953
LOC100133264	36.7618	2.3128	584.327	0.0106467
LOC642131	3.70133	1.39471	9.82271	0.0085877
LOC441416	45.6909	1.87272	1114.78	0.0190325
NCRNA00152	4.98244	1.02017	24.334	0.0471848
NAP1L6	29.4141	2.09942	412.11	0.012052
LOC730081	0.0403318	0.00477621	0.340575	0.00318315
RNFT2	11.2041	1.01367	123.838	0.0487194
LOC729200	2.54094	1.17765	5.4824	0.0174667
LOC730176	9.19459	1.17793	71.7705	0.0343313
LOC731109	0.0116647	0.000344099	0.395427	0.0132839
LOC729402	3.21732	1.28162	8.07659	0.0128345
LOC729799	5.67231	1.48484	21.6691	0.0111476
LOC730173	4.94544	1.0897	22.4442	0.0383333
LOC729667	0.047716	0.0037081	0.614013	0.0195879
LOC729666	3.8141	1.03501	14.0553	0.0442541
LOC729259	0.0290754	0.00133337	0.634017	0.024466
LOC729009	1.47195	1.0316	2.10026	0.0330463
PRAMEF13	16.1353	1.87264	139.027	0.0113773
LOC729768	2.27573	1.38605	3.7365	0.00115254
KIF22	0.524186	0.297841	0.922544	0.0251242
EYS	6.0109	1.05539	34.2348	0.043311
LOC392335	0.0381206	0.00251754	0.577222	0.0184576
LOC731779	10.5111	1.95483	56.5176	0.00612552
LOC100129716	20.7154	2.91616	147.155	0.00244653
ATAD2B	0.152965	0.0249606	0.937411	0.0423728
LOC729859	0.100476	0.0158615	0.636477	0.0147012
LOC91316	0.305042	0.0987331	0.942446	0.0391167
HIST1H3E	8.18883	1.52931	43.8478	0.0140422
LOC100134173	80.1916	4.35738	1475.82	0.0031732
ARD1B	0.0532946	0.00296172	0.959008	0.0467731
IMMP1L	52.4625	2.8657	960.435	0.00759139
RNU1-5	1.63363	1.12906	2.36369	0.00921507
UPLP	0.748253	0.565022	0.990905	0.042999
MEG8	14.9763	2.26043	99.2249	0.00502703
NYNRIN	0.717764	0.517068	0.99636	0.0475062
LOC728901	3.63913	1.28853	10.2778	0.0147474
LOC728908	1.98609	1.001	3.94063	0.0496671
FAM47E	0.0318517	0.00309621	0.327669	0.00375369
RNF207	0.201802	0.0439776	0.926022	0.0395102
SNORA76	3.53707	1.01921	12.2751	0.0465979
RNY1	1.7279	1.1475	2.60185	0.00882405
NCLN	1.97056	1.1137	3.48667	0.0198151
LOC730324	0.591765	0.36336	0.963742	0.0349982
CHADL	0.0626602	0.0118054	0.332585	0.0011435
LOC257054	17.7432	1.5509	202.991	0.0207294
LOC652725	17.1808	1.41061	209.256	0.0257674
PLGLB2	35.0292	2.15049	570.587	0.0124977
LOC100133409	53.0186	1.48609	1891.53	0.0294672
OAZ2	2.3751	1.05412	5.35146	0.0368758
C4ORF48	3.35048	1.20077	9.34881	0.0209203
LOC100216001	2.87519	1.08935	7.58866	0.0329418
LOC727967	3.73791	1.25233	11.1568	0.0181154
LOC100133565	2.59911	1.31578	5.13412	0.00595765
SNORA11B	0.105198	0.0134105	0.825225	0.032133
LOC100134766	21.6544	1.3225	354.565	0.0310893
C10ORF140	0.246796	0.0739803	0.823304	0.0228298
HBA1	1.31336	1.10671	1.55859	0.00180377
RNU1F1	2.78408	1.17788	6.58051	0.0196481
SNORA56	5.88325	1.02447	33.7859	0.0469148
TMSL3	1.74466	1.0203	2.98328	0.0420152
AEN	4.32805	1.44584	12.9558	0.00881794
ELTD1	2.3473	1.18063	4.66683	0.0149522
ZNF488	0.263388	0.0767347	0.904063	0.0339851
ANO3	0.0284831	0.00149448	0.542855	0.0179721
ZBTB7C	0.485865	0.321147	0.73507	0.000633181
RNY4	1.69161	1.07699	2.65698	0.0224945
LOC100131856	32.1142	2.53205	407.306	0.00743367
SCARNA18	9.05583	1.00484	81.6128	0.0494986
MEGF6	0.56558	0.343683	0.930742	0.0249378
HULC	4.48376	1.49514	13.4463	0.00741115
KANK4	1.57152	1.1433	2.16014	0.00535205
TMEM204	2.31502	1.1263	4.75831	0.0223994
C1ORF133	0.390379	0.167329	0.910757	0.0295376
EMX2OS	4.99381	1.22423	20.3705	0.0249611
GPX8	1.47667	1.00772	2.16387	0.0455663
ASAH2C	5.80751	1.29191	26.1064	0.0217934
SNORA58	14.3209	1.45222	141.223	0.0226385
LOC100134651	23.5177	1.30701	423.166	0.0322303
LOC727880	50.1323	1.42229	1767.04	0.0312576
SIGLEC14	1.66948	1.10528	2.52168	0.0148648
C2ORF55	0.606851	0.42738	0.861687	0.00523618
FDXACB1	48.229	4.01555	579.258	0.00224258
DDX60L	1.80712	1.05495	3.0956	0.0311812
LOC285205	18.3168	1.20979	277.324	0.0359645
ASAP1IT1	3.15149	1.05392	9.42373	0.0399817
LOC729379	0.0247873	0.0011857	0.518185	0.017134
SNORA38	13.9636	1.18651	164.332	0.0360897
RNU1G2	1.70896	1.16225	2.51284	0.00644282
LOC100131986	31.5115	1.35091	735.04	0.0317823
FOXI3	97.7631	8.4437	1131.92	0.000245146
LOC100133999	2.84705	1.09626	7.39394	0.0316572
LOC100133627	3.38542	1.07077	10.7035	0.0378572
LOC100134032	47.5304	1.4798	1526.65	0.029157
RNU1A3	2.22474	1.28869	3.8407	0.00409994
TMEM59L	9.20644	1.18896	71.2881	0.0335286
C1ORF130	0.085751	0.0102492	0.717443	0.0234302
LOC654433	3.86521	1.7242	8.66482	0.00102852
RNU1-3	1.72233	1.17717	2.51996	0.00510951
CNPY1	0.0344844	0.00120056	0.990516	0.0493533
SNORD1C	0.0108413	0.000337441	0.348312	0.0105971
LOC100132347	9.88276	1.97937	49.3435	0.00523535
LOC652750	14.7896	1.40428	155.762	0.0249223
BSPRY	0.533974	0.318173	0.896141	0.0175453
LOC100134560	14.2472	1.76256	115.163	0.0127198
C11ORF20	18.3895	1.11184	304.159	0.0419498
FAM22D	11.2011	1.13385	110.653	0.0386906
C1ORF194	0.0987734	0.0134817	0.723662	0.0227103
LOC169834	0.149982	0.0487372	0.461548	0.000939366
LOC100127952	30.0718	1.24603	725.755	0.036137
C18ORF18	0.166869	0.0403612	0.689904	0.013415
LOC100129375	27.3542	1.24404	601.47	0.0358658
LOC100130413	15.6911	1.4542	169.311	0.0232982
LOC100128337	2.58197	1.26801	5.25748	0.00893744
GAPDHL6	1.56666	1.08654	2.25893	0.0161944
LOC100129117	10.9092	1.13075	105.251	0.0388085
LOC100130701	10.2784	1.15259	91.6586	0.0368725
LOC100128252	0.368714	0.149387	0.910053	0.0304314
LOC100129434	50.7904	1.8398	1402.15	0.0203363
LOC100129781	2.05154	1.18063	3.56489	0.0108043
LOC100130229	1.67659	1.05766	2.65771	0.0279164
LOC727997	15.9806	1.21774	209.716	0.0348631
LOC728162	0.0142409	0.000556937	0.364139	0.0101462
LOC642567	1.96196	1.21984	3.15556	0.00544341
LOC441487	38.4134	2.17393	678.767	0.0127769
LOC392301	0.18547	0.0487594	0.70549	0.013445
LOC654780	0.284336	0.0881769	0.916875	0.0352703
LOC649346	51.9155	3.10348	868.453	0.00599774
LOC646049	30.214	1.46105	624.811	0.0274336
LOC391359	0.153988	0.0365487	0.648788	0.0107859
LOC647012	29.675	3.44208	255.835	0.00203846
LOC100132910	18.0943	1.00852	324.64	0.0493307
LOC645548	25.9576	1.19519	563.756	0.0381259
LOC441442	0.23947	0.0876019	0.654617	0.00534013
LOC100131061	29.4773	1.37102	633.772	0.030653
LOC390940	0.364052	0.17204	0.770364	0.0082383
LOC100132942	0.399058	0.204147	0.780062	0.00722545
LOC441009	5.5746	1.12018	27.7422	0.0358547
LOC729841	2.53929	1.1581	5.56777	0.0199983
LOC728453	0.423534	0.208038	0.86225	0.0178568
LOC729313	0.081661	0.00687945	0.969338	0.0471851
LOC729212	247.84	7.36576	8339.19	0.00211844
LOC730861	62.558	1.31639	2972.9	0.0357726
LOC728558	0.0380441	0.00157929	0.916458	0.0440407
LOC729350	0.0517741	0.00421039	0.636654	0.0207425
LOC729806	16.1188	2.60975	99.5562	0.00276639
ZNF788	2.42803	1.21293	4.86039	0.0122415
LOC728971	40.4341	1.82912	893.827	0.0191679
DLEU7	472.31	21.7317	10265	8.86e-05
TAOK3	3.83359	1.23321	11.9172	0.0202219
GAN	0.274002	0.0911539	0.823631	0.0211383
MIR583	42.7686	1.49393	1224.4	0.0281991
MIR302C	2.00771	1.1979	3.36496	0.00816204
RNU6-1	1.79475	1.01946	3.15964	0.0426862
MIR223	17.6362	1.4178	219.379	0.0256548
MIR1974	1.32284	1.00651	1.73857	0.0447999
MIR557	17.954	1.06886	301.581	0.0448323
MIR106A	23.5445	1.65519	334.912	0.0197024
MIR1281	0.0443344	0.00258113	0.761505	0.0317327
RNU4-1	1.8756	1.15	3.059	0.0117365
MIR300	11.7613	1.5519	89.1346	0.0170669
VTRNA1-1	2.65589	1.05	6.71783	0.0391109
MIR1275	3.50435	1.43121	8.58044	0.00605717
RNU6-15	1.79412	1.01258	3.17889	0.0451991
MIR939	3.61266	1.11391	11.7166	0.0323814
MIR1229	18.8082	1.46186	241.986	0.0243672
MIR708	34.0285	1.03341	1120.5	0.0478836
