# Supplementary material for: An Integrated Analysis of Prognostic Signature and Immune Microenvironment in Tongue Squamous Cell Carcinoma
Source: Front Oncol. 2022 Jul 13;12:891716. doi: 10.3389/fonc.2022.891716 (PMC9326056; doi:10.3389/fonc.2022.891716)
Supplement: Supplementary Table 5 — The interacted genes from turquoise co-expression module, TCGA and GSE65858 datasets. [file Table_5.xlsx]

## Sheet: Sheet1
Biomarkers indicates better survival	Biomarkers indicates poor survival
PLXNB1	ZNF281
PITX1	MYO1B
N4BP3	BASP1
SH2D4A	CSF2
RALGPS1	DSE
NKX2-3	GOPC
SIGIRR	DCBLD1
PPFIBP2	KDELR2
LMF1	FKBP14
IL34	INHBA
ZFP3	CALU
HLF	MSC
SLC25A23	INTS8
FAM83E	MTDH
SIM2	DERL1
	NEK6
	PLAU
	SERPINH1
	OAF
	ITGA5
	PXN
	HSPH1
	SNAPC1
	ACTN1
	SCG5
	CMIP
	AXL
	PVR
	MAP7D3
