# Supplementary material for: An Integrated Analysis of Prognostic Signature and Immune Microenvironment in Tongue Squamous Cell Carcinoma
Source: Front Oncol. 2022 Jul 13;12:891716. doi: 10.3389/fonc.2022.891716 (PMC9326056; doi:10.3389/fonc.2022.891716)
Supplement: Supplementary Table 6 — The Coefficient of risk model based on the Lasso Cox regression. [file Table_6.xlsx]

## Sheet: Table 6 geneCoef new 11
Gene	Coef
PLXNB1	-0.089382
N4BP3	-0.028011
KDELR2	0.0560929
INTS8	0.0160696
PLAU	0.0562716
PPFIBP2	-0.0428279
OAF	0.0805967
LMF1	-0.0329074
IL34	-0.0426008
ZFP3	-0.021609
MAP7D3	0.0546886
